# Supplementary material for: Metal-free synthesis of carboxamides via the Lossen rearrangement
Source: Royal Society of Chemistry journal article supplement (doi:10.1039/d4qo02155j), 2025-01-01

## Supporting Information

### Metal-free synthesis of carboxamides via Lossen rearrangement

Chong Li,\* Yi-Fei Liu, Wei Yang, Lian-Jie Zhao, Lin-Yuan Song, Yu-Shuang Deng, Ke-Yu Mou, Jing-Wen Wang, Sheng Cao, and Feng Li\*

College of Food Science and Pharmaceutical Engineering, Zaozhuang University  
Zaozhuang, Shandong 277160, P. R. China

| Contents:                                                                        | Page    |
|----------------------------------------------------------------------------------|---------|
| <b>1. General Information</b> .....                                              | S2      |
| <b>2. General Procedure</b> .....                                                | S2-S3   |
| <b>3. Optimization Studies of <math>\beta</math>-Ketophosphorus Ylides</b> ..... | S3      |
| <b>4. Optimization Studies of Imidazolidindiones</b> .....                       | S3      |
| <b>5. Gram-Scale Reactions</b> .....                                             | S3-S4   |
| <b>6. Investigation of the Reaction Mechanism</b> .....                          | S4-S5   |
| <b>7. Characterization Data of New Product</b> .....                             | S5-S20  |
| <b>8. References</b> .....                                                       | S20     |
| <b>9. NMR Spectra of Products</b> .....                                          | S20-S90 |

## 1. General Information

$^1\text{H}$  and  $^{13}\text{C}$  NMR spectra were recorded on a Bruker AVANCE NEO 400 spectrometer (400 MHz for  $^1\text{H}$ , 101 MHz for  $^{13}\text{C}$ , and 162 MHz for  $^{31}\text{P}$ ) in  $\text{CDCl}_3$  or  $\text{DMSO}-d_6$ . Chemical shifts ( $\delta$ ) were measured in ppm relative to TMS  $\delta = 0$  for  $^1\text{H}$ , or to chloroform  $\delta = 77.0$  for  $^{13}\text{C}$  as internal standard.  $^{31}\text{P}$  NMR spectra were recorded on the same instrument. Data are reported as follows: Chemical shift, multiplicity (s = singlet, d = doublet, t = triplet, q = quartet, m = multiplet), and Coupling constants,  $J$ , are reported in hertz. Mass data were measured with Waters Xevo TQ-XS mass spectrometer. The starting materials were purchased from Aldrich, Acros Organics, J&K Chemicals, or TCI and used without further purification. Solvents were dried and purified according to the "Purification of Laboratory Chemicals book" procedure. Column chromatography was performed on silica gel (particle size 200-400 mesh ASTM). The hydroxylamine derivatives were prepared according to the literature<sup>[1]</sup>.

## 2. General Procedure

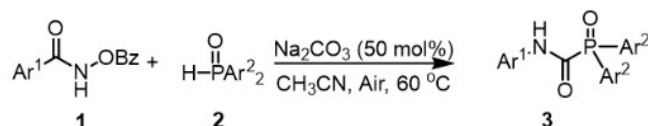

**Conditions:** In a 20 ml Schlenk tube containing a magnetic stir bar, 1 (0.2 mmol), 2 (0.4 mmol),  $\text{Na}_2\text{CO}_3$  (50 mol %) in 4 mL  $\text{CH}_3\text{CN}$  under Air at 60 °C for 10 h. After completion, the reaction was quenched by adding a saturated aqueous solution of  $\text{NaHCO}_3$  (2 mL), concentrated under reduced pressure. The residue was diluted with EtOAc (20 mL), washed sequentially with saturated aqueous solution of  $\text{NaHCO}_3$  (10 mL) and brine (10 mL), dried over anhydrous  $\text{Na}_2\text{SO}_4$ , filtered and concentrated under vacuum. The residue was purified by flash chromatography on silica gel to afford the desired compound 3.

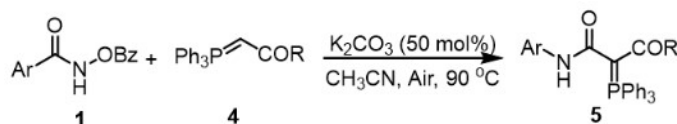

**Conditions:** In a 20 ml Schlenk tube containing a magnetic stir bar, 1 (0.2 mmol), 4 (0.24 mmol),  $\text{K}_2\text{CO}_3$  (50 mol %) in 4 mL  $\text{CH}_3\text{CN}$  under Air at 90 °C for 10 h. After completion, the reaction was quenched by adding a saturated aqueous solution of  $\text{NaHCO}_3$  (2 mL), concentrated under reduced pressure. The residue was diluted with EtOAc (20 mL), washed sequentially with saturated aqueous solution of  $\text{NaHCO}_3$  (10 mL) and brine (10 mL), dried over anhydrous  $\text{Na}_2\text{SO}_4$ , filtered and concentrated under vacuum. The residue was purified by flash chromatography on silica gel to afford the desired compound 5.

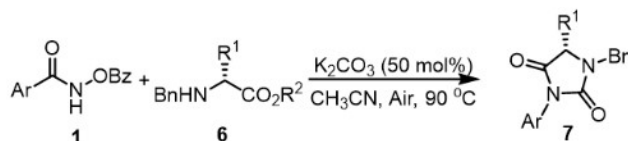

**Conditions:** In a 20 ml Schlenk tube containing a magnetic stir bar, 1 (0.2 mmol), 6 (0.24 mmol),  $\text{K}_2\text{CO}_3$  (50 mol %) in 4 mL  $\text{CH}_3\text{CN}$  under Air at 90 °C for 10 h. After

completion, the reaction was quenched by adding a saturated aqueous solution of NaHCO<sub>3</sub> (2 mL), concentrated under reduced pressure. The residue was diluted with EtOAc (20 mL), washed sequentially with saturated aqueous solution of NaHCO<sub>3</sub> (10 mL) and brine (10 mL), dried over anhydrous Na<sub>2</sub>SO<sub>4</sub>, filtered and concentrated under vacuum. The residue was purified by flash chromatography on silica gel to afford the desired compound 7.

### 3. Optimization Studies of $\beta$ -Ketophosphorus Ylides<sup>a</sup>

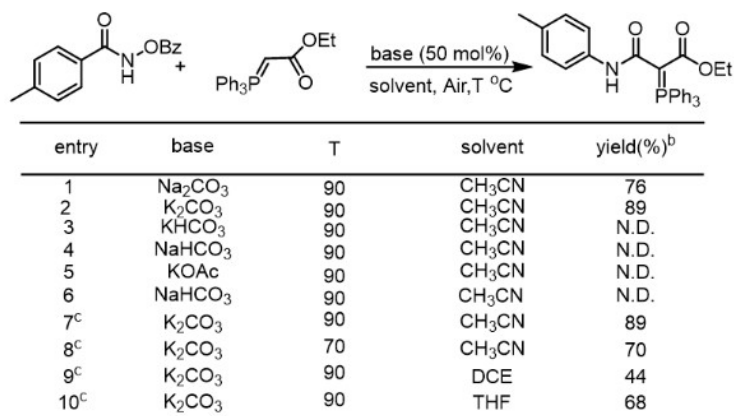

<sup>a</sup> The reaction was performed with 0.2 mmol of *N*-(benzoyloxy)-4-methylbenzamide, P-ylide (2.0 eq.), and K<sub>2</sub>CO<sub>3</sub> (50 mol%) in 4 mL CH<sub>3</sub>CN under Air at 90 °C. <sup>b</sup> Isolated yield. <sup>c</sup> P-ylide (1.2 eq.)

### 4. Optimization Studies of Imidazolidindiones<sup>a</sup>

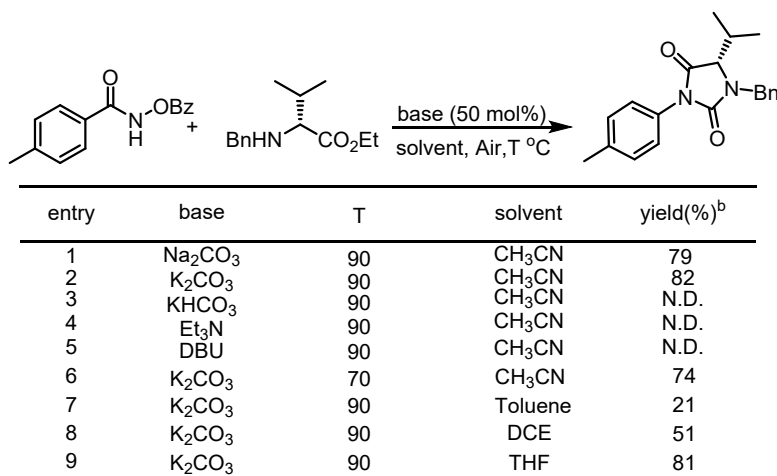

<sup>a</sup> The reaction was performed with 0.2 mmol of **1**, **6** (1.2 eq.), and K<sub>2</sub>CO<sub>3</sub> (50 mol%) in 4 mL CH<sub>3</sub>CN under Air at 90 °C <sup>b</sup> Isolated yield.

### 5. Gram-Scale Reactions

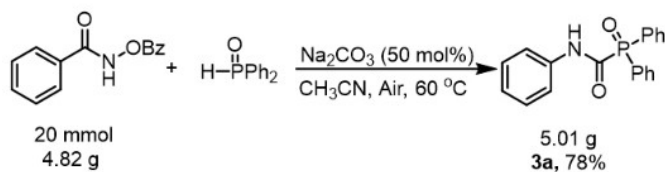

**Conditions:** In a 200 ml round-bottom flask containing a magnetic stir bar, *N*-(benzoyloxy)benzamide (20 mmol), diphenylphosphine oxide (2.0 eq.), Na<sub>2</sub>CO<sub>3</sub> (50 mol %) in 100 mL CH<sub>3</sub>CN under Air at 60 °C for 10 h. After completion, the reaction

was quenched by adding a saturated aqueous solution of NaHCO<sub>3</sub> (200 mL), concentrated under reduced pressure. The residue was diluted with EtOAc (200 mL), washed sequentially with saturated aqueous solution of NaHCO<sub>3</sub> (100 mL) and brine (100 mL), dried over anhydrous Na<sub>2</sub>SO<sub>4</sub>, filtered and concentrated under vacuum. The residue was purified by flash chromatography on silica gel to afford the desired compound 3a.

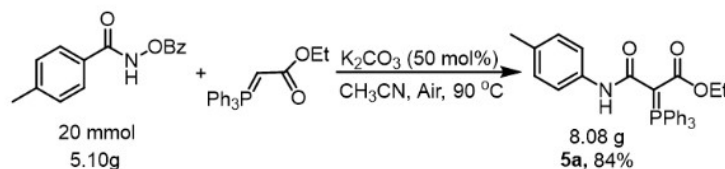

**Conditions:** In a 200 ml round-bottom flask containing a magnetic stir bar, *N*-(benzoyloxy)-4-methylbenzamide (20 mmol), P-ylide (1.2 eq.), K<sub>2</sub>CO<sub>3</sub> (50 mol %) in 100 mL CH<sub>3</sub>CN under Air at 90 °C for 10 h. After completion, the reaction was quenched by adding a saturated aqueous solution of NaHCO<sub>3</sub> (200 mL), concentrated under reduced pressure. The residue was diluted with EtOAc (200 mL), washed sequentially with saturated aqueous solution of NaHCO<sub>3</sub> (100 mL) and brine (100 mL), dried over anhydrous Na<sub>2</sub>SO<sub>4</sub>, filtered and concentrated under vacuum. The residue was purified by flash chromatography on silica gel to afford the desired compound 5a.

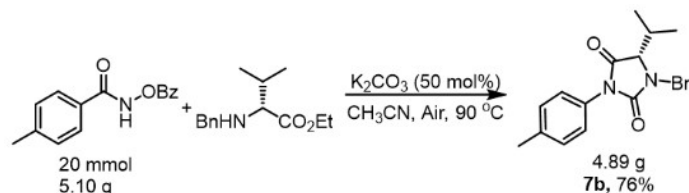

**Conditions:** In a 200 ml Schlenk tube containing a magnetic stir bar, *N*-(benzoyloxy)-4-methylbenzamide (20 mmol), ethyl benzyl-D-valinate (1.2 eq.), K<sub>2</sub>CO<sub>3</sub> (50 mol %) in 120 mL CH<sub>3</sub>CN under Air at 90 °C for 10 h. After completion, the reaction was quenched by adding a saturated aqueous solution of NaHCO<sub>3</sub> (200 mL), concentrated under reduced pressure. The residue was diluted with EtOAc (200 mL), washed sequentially with saturated aqueous solution of NaHCO<sub>3</sub> (100 mL) and brine (100 mL), dried over anhydrous Na<sub>2</sub>SO<sub>4</sub>, filtered and concentrated under vacuum. The residue was purified by flash chromatography on silica gel to afford the desired compound 7b.

## 6. Investigation of the Reaction Mechanism

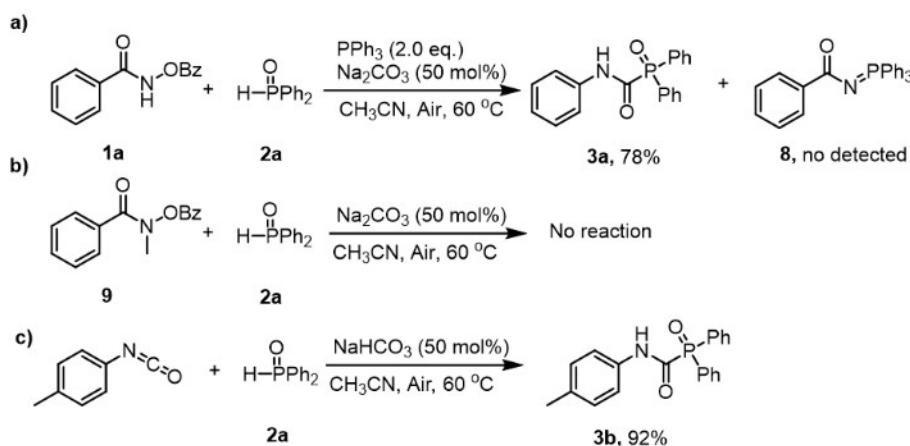

**Condition a:** In a 20 ml round-bottom flask containing a magnetic stir bar, *N*-(benzyloxy)benzamide (0.2 mmol), diphenylphosphine oxide (2.0 eq.), Na<sub>2</sub>CO<sub>3</sub> (50 mol %), PPh<sub>3</sub> (2.0 eq.) in 4 mL CH<sub>3</sub>CN under Air at 60 °C for 10 h. After completion, the reaction was quenched by adding a saturated aqueous solution of NaHCO<sub>3</sub> (2 mL), concentrated under reduced pressure. The residue was diluted with EtOAc (20 mL), washed sequentially with saturated aqueous solution of NaHCO<sub>3</sub> (10 mL) and brine (10 mL), dried over anhydrous Na<sub>2</sub>SO<sub>4</sub>, filtered and concentrated under vacuum. The residue was purified by flash chromatography on silica gel to afford the desired compound 3a, TLC detected no product **8**.

**Condition b:** In a 20 ml round-bottom flask containing a magnetic stir bar, **9** (0.2 mmol), diphenylphosphine oxide (2.0 eq.), Na<sub>2</sub>CO<sub>3</sub> (50 mol %) in 4 mL CH<sub>3</sub>CN under Air at 60 °C for 10 h. There was no reaction was detected.

**Condition c:** In a 20 ml round-bottom flask containing a magnetic stir bar, *p*-Tolyl isocyanate (0.2 mmol), diphenylphosphine oxide (2.0 eq.), Na<sub>2</sub>CO<sub>3</sub> (50 mol %) in 4 mL CH<sub>3</sub>CN under Air at 60 °C for 10 h. After completion, the reaction was quenched by adding a saturated aqueous solution of NaHCO<sub>3</sub> (2 mL), concentrated under reduced pressure. The residue was diluted with EtOAc (20 mL), washed sequentially with saturated aqueous solution of NaHCO<sub>3</sub> (10 mL) and brine (10 mL), dried over anhydrous Na<sub>2</sub>SO<sub>4</sub>, filtered and concentrated under vacuum. The residue was purified by flash chromatography on silica gel to afford the desired compound 3a.

## 7. Characterization Data of New Product

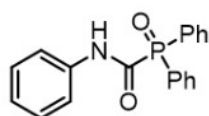

### 1-(diphenylphosphoryl)-*N*-phenylformamide (**3a**)

<sup>1</sup>H NMR (400 MHz, CDCl<sub>3</sub>) δ 10.01 (s, 1H), 8.15 – 7.85 (m, 4H), 7.75 (d, *J* = 8.0 Hz, 2H), 7.56 (td, *J* = 7.3, 1.4 Hz, 2H), 7.53 – 7.42 (m, 4H), 7.31 (t, *J* = 8.0 Hz, 2H), 7.15 (d, *J* = 7.4 Hz, 1H). <sup>13</sup>C NMR (101 MHz, CDCl<sub>3</sub>) δ 167.9 (d, *J* = 123.3 Hz), 136.9 (d, *J* = 9.5 Hz), 132.7 (d, *J* = 2.8 Hz), 131.8, 131.7, 129.3, 128.9, 128.7, 128.6, 128.3, 125.4, 120.0. <sup>31</sup>P NMR (162 MHz, CDCl<sub>3</sub>) δ 15.6. HRMS (ESI-TOF) *m/z*: [M + H]<sup>+</sup> Calcd for C<sub>19</sub>H<sub>17</sub>NO<sub>2</sub>P<sup>+</sup>: 322.0991, found 322.0991.

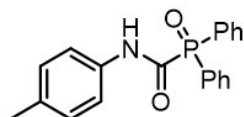

### 1-(diphenylphosphoryl)-*N*-(*p*-tolyl)formamide (**3b**)

<sup>1</sup>H NMR (400 MHz, CDCl<sub>3</sub>) δ 9.57 (s, 1H), 8.13 – 7.93 (m, 3H), 7.58 (dd, *J* = 11.6, 4.8 Hz, 4H), 7.49 (td, *J* = 7.5, 3.2 Hz, 4H), 7.14 (d, *J* = 8.3 Hz, 2H), 2.31 (s, 3H). <sup>13</sup>C NMR (101 MHz, CDCl<sub>3</sub>) δ 167.6 (d, *J* = 123.0 Hz), 135.3, 134.2 (d, *J* = 9.6 Hz), 132.7, 132.7, 131.8, 131.7, 129.5, 129.3, 128.8, 128.6, 128.3, 119.8, 20.9. <sup>31</sup>P NMR (162 MHz, CDCl<sub>3</sub>) δ 15.6. HRMS (ESI-TOF) *m/z*: [M + H]<sup>+</sup> Calcd for C<sub>20</sub>H<sub>19</sub>NO<sub>2</sub>P<sup>+</sup>: 336.1148, found 336.1154.

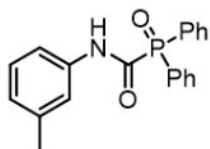

**1-(diphenylphosphoryl)-N-(m-tolyl)formamide (3c)**

$^1\text{H}$  NMR (400 MHz,  $\text{CDCl}_3$ )  $\delta$  9.54 (s, 1H), 8.06 – 7.78 (m, 4H), 7.64 – 7.46 (m, 3H), 7.43-7.38 (m, 5H), 7.15 (dd,  $J = 16.0, 8.2$  Hz, 1H), 6.90 (d,  $J = 7.6$  Hz, 1H), 2.24 (s, 3H).  $^{13}\text{C}$  NMR (101 MHz,  $\text{CDCl}_3$ )  $\delta$  166.8 (d,  $J = 123.0$  Hz), 138.1, 135.7 (d,  $J = 9.5$  Hz), 131.8, 131.8, 130.8, 130.7, 128.2, 127.9, 127.8, 127.7, 127.2, 125.4, 119.5, 116.0, 20.4.  $^{31}\text{P}$  NMR (162 MHz,  $\text{CDCl}_3$ )  $\delta$  15.7. HRMS (ESI-TOF)  $m/z$ :  $[\text{M} + \text{H}]^+$  Calcd for  $\text{C}_{20}\text{H}_{19}\text{NO}_2\text{P}^+$ : 336.1148, found 336.1154.

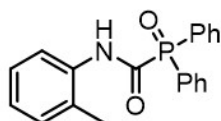

**1-(diphenylphosphoryl)-N-(o-tolyl)formamide (3d)**

$^1\text{H}$  NMR (400 MHz,  $\text{CDCl}_3$ )  $\delta$  9.52 (s, 1H), 7.88-7.84 (m, 5H), 7.54 – 7.31 (m, 6H), 7.19 – 7.02 (m, 2H), 6.97 (t,  $J = 7.3$  Hz, 1H), 2.22 (s, 3H).  $^{13}\text{C}$  NMR (101 MHz,  $\text{CDCl}_3$ )  $\delta$  167.9 (d,  $J = 122.5$  Hz), 134.6 (d,  $J = 9.0$  Hz), 132.9 (d,  $J = 2.8$  Hz), 131.8, 131.7, 130.8, 130.0, 129.4, 129.1, 128.9, 128.8, 128.4, 128.3, 126.8, 126.1, 122.2, 17.8.  $^{31}\text{P}$  NMR (162 MHz,  $\text{CDCl}_3$ )  $\delta$  15.7. HRMS (ESI-TOF)  $m/z$ :  $[\text{M} + \text{H}]^+$  Calcd for  $\text{C}_{20}\text{H}_{19}\text{NO}_2\text{P}^+$ : 336.1148, found 336.1154.

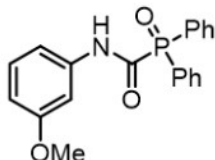

**1-(diphenylphosphoryl)-N-(3-methoxyphenyl)formamide (3e)**

$^1\text{H}$  NMR (400 MHz,  $\text{CDCl}_3$ )  $\delta$  9.60 (s, 1H), 8.11 – 7.84 (m, 4H), 7.69 – 7.41 (m, 8H), 7.27 – 7.17 (m, 2H), 6.78 – 6.66 (m, 1H), 3.77 (s, 3H).  $^{13}\text{C}$  NMR (101 MHz,  $\text{CDCl}_3$ )  $\delta$  168.0 (d,  $J = 122.9$  Hz), 160.1, 137.9, 137.8, 132.8, 131.8, 131.7, 129.8, 129.1, 128.8, 128.7, 128.1, 112.0, 111.9, 105.2, 55.3.  $^{31}\text{P}$  NMR (162 MHz,  $\text{CDCl}_3$ )  $\delta$  15.8. HRMS (ESI-TOF)  $m/z$ :  $[\text{M} + \text{Na}]^+$  Calcd for  $\text{C}_{20}\text{H}_{18}\text{NO}_3\text{PNa}^+$ : 374.0917, found 374.0925

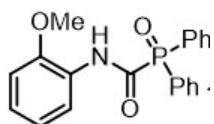

**1-(diphenylphosphoryl)-N-(2-methoxyphenyl)formamide (3f)**

$^1\text{H}$  NMR (400 MHz, DMSO)  $\delta$  9.99 (s, 1H), 8.11 (d,  $J = 7.9$  Hz, 1H), 7.93 – 7.84 (m, 4H), 7.77 – 7.68 (m, 2H), 7.66 – 7.60 (m, 4H), 7.19 (dd,  $J = 7.3, 1.5$  Hz, 1H), 7.14 (dd,  $J = 8.3, 1.3$  Hz, 1H), 7.03 – 6.88 (m, 1H), 3.91 (s, 3H).  $^{13}\text{C}$  NMR (101 MHz, DMSO)  $\delta$  168.1 (d,  $J = 122.2$  Hz), 149.5, 133.5, 133.5, 131.9, 131.8, 129.9, 129.6, 129.5, 128.9, 126.7, 126.0, 125.9, 121.0, 120.9, 111.9, 56.5.  $^{31}\text{P}$  NMR (162 MHz, DMSO)  $\delta$  14.8.

HRMS (ESI-TOF)  $m/z$ :  $[M+Na]^+$  Calcd for  $C_{20}H_{18}NO_3PNa^+$ : 374.0917, found 374.0925

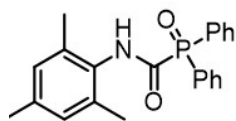

**1-(diphenylphosphoryl)-*N*-mesitylformamide (3g)**

$^1H$  NMR (400 MHz,  $CDCl_3$ )  $\delta$  8.90 (s, 1H), 7.97 (ddd,  $J = 12.1, 8.3, 1.3$  Hz, 4H), 7.59 (dd,  $J = 7.5, 1.6$  Hz, 2H), 7.55 – 7.47 (m, 4H), 6.88 (s, 2H), 2.26 (s, 3H), 2.13 (s, 6H).  $^{13}C$  NMR (101 MHz,  $CDCl_3$ )  $\delta$  168.3 (d,  $J = 132.8$  Hz), 134.7, 132.7, 132.7, 131.7, 131.6, 129.6, 129.0, 128.8, 128.7, 128.6, 20.9, 18.3.  $^{31}P$  NMR (162 MHz,  $CDCl_3$ )  $\delta$  16.2. HRMS (ESI-TOF)  $m/z$ :  $[M+H]^+$  Calcd for  $C_{22}H_{23}NO_2P^+$ : 364.1461, found 364.1464.

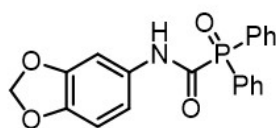

***N*-(benzo[*d*][1,3]dioxol-5-yl)-1-(diphenylphosphoryl)formamide (3h)**

$^1H$  NMR (400 MHz,  $CDCl_3$ )  $\delta$  9.47 (s, 1H), 7.87 (dd,  $J = 12.0, 7.4$  Hz, 4H), 7.52 (t,  $J = 7.0$  Hz, 2H), 7.43 (td,  $J = 7.4, 3.0$  Hz, 4H), 7.33 (d,  $J = 1.3$  Hz, 1H), 7.19 (s, 1H), 6.99 (dd,  $J = 8.3, 1.5$  Hz, 1H), 6.68 (d,  $J = 8.4$  Hz, 1H), 5.87 (s, 2H).  $^{13}C$  NMR (101 MHz,  $CDCl_3$ )  $\delta$  166.4 (d,  $J = 123.3$  Hz), 146.8, 144.1, 131.8, 131.8, 130.8, 130.7, 130.2, 130.1, 128.2, 127.8, 127.7, 127.2, 112.2, 107.1, 101.2, 100.4.  $^{31}P$  NMR (162 MHz,  $CDCl_3$ )  $\delta$  15.7. HRMS (ESI-TOF)  $m/z$ :  $[M+H]^+$  Calcd for  $C_{20}H_{17}NO_4P^+$ : 366.0890, found 366.0896.

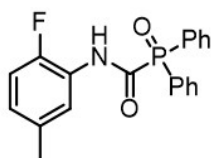

**1-(diphenylphosphoryl)-*N*-(2-fluoro-5-methylphenyl)formamide (3i)**

$^1H$  NMR (400 MHz,  $CDCl_3$ )  $\delta$  9.47 (s, 1H), 8.08 (d,  $J = 7.3$  Hz, 1H), 7.99 – 7.72 (m, 4H), 7.57 – 7.47 (m, 2H), 7.47 – 7.33 (m, 4H), 6.91 (dd,  $J = 10.4, 8.5$  Hz, 1H), 6.83 – 6.68 (m, 1H), 2.20 (s, 3H).  $^{13}C$  NMR (101 MHz,  $CDCl_3$ )  $\delta$  168.5 (d,  $J = 122.5$  Hz), 150.8 (d,  $J = 244.1$  Hz), 134.3, 134.3, 133.0, 132.9, 131.9, 131.8, 129.1, 128.9, 128.8, 128.1, 126.5, 126.4, 124.7, 124.6, 124.6, 122.1, 115.0, 114.8, 21.0.  $^{31}P$  NMR (162 MHz,  $CDCl_3$ )  $\delta$  15.7. HRMS (ESI-TOF)  $m/z$ :  $[M+H]^+$  Calcd for  $C_{20}H_{18}FNO_2P^+$ : 354.1054, found 354.1053.

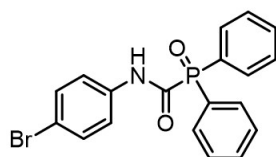

***N*-(4-bromophenyl)-1-(diphenylphosphoryl)formamide (3j)**

$^1\text{H}$  NMR (400 MHz,  $\text{CDCl}_3$ )  $\delta$  9.84 (s, 1H), 7.93 (ddd,  $J = 12.1, 8.3, 1.3$  Hz, 4H), 7.70 – 7.55 (m, 4H), 7.55 – 7.47 (m, 4H), 7.47 – 7.39 (m, 2H).  $^{13}\text{C}$  NMR (101 MHz,  $\text{CDCl}_3$ )  $\delta$  168.2 (d,  $J = 122.6$  Hz), 135.9, 135.8, 132.9, 132.9, 132.1, 131.8, 131.7, 129.1, 128.9, 128.8, 128.0, 121.6, 118.3.  $^{31}\text{P}$  NMR (162 MHz,  $\text{CDCl}_3$ )  $\delta$  15.9. HRMS (ESI-TOF)  $m/z$ :  $[\text{M} + \text{Na}]^+$  Calcd for  $\text{C}_{19}\text{H}_{15}\text{BrNO}_2\text{PNa}^+$ : 421.9916, found 421.9924.

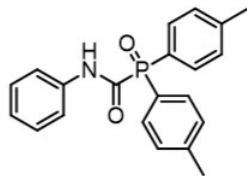

### 1-(di-*p*-tolylphosphoryl)-*N*-phenylformamide (3l)

$^1\text{H}$  NMR (400 MHz,  $\text{CDCl}_3$ )  $\delta$  9.58 (s, 1H), 7.95 – 7.76 (m, 4H), 7.69 (d,  $J = 7.9$  Hz, 2H), 7.43 – 7.23 (m, 6H), 7.16 (d,  $J = 7.4$  Hz, 1H), 2.40 (s, 6H).  $^{13}\text{C}$  NMR (101 MHz,  $\text{CDCl}_3$ )  $\delta$  168.4 (d,  $J = 122.7$  Hz), 143.4, 136.9, 136.8, 131.8, 131.7, 129.5, 129.4, 129.0, 126.0, 125.4, 125.0, 119.8, 21.6.  $^{31}\text{P}$  NMR (162 MHz,  $\text{CDCl}_3$ )  $\delta$  16.8. HRMS (ESI-TOF)  $m/z$ :  $[\text{M} + \text{Na}]^+$  Calcd for  $\text{C}_{21}\text{H}_{20}\text{NO}_2\text{PNa}^+$ : 372.1124, found 372.1133.

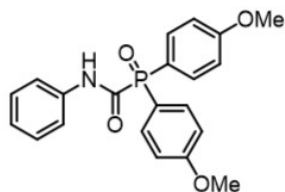

### 1-(bis(4-methoxyphenyl)phosphoryl)-*N*-phenylformamide (3m)

$^1\text{H}$  NMR (400 MHz,  $\text{CDCl}_3$ )  $\delta$  9.65 (s, 1H), 7.93 – 7.78 (m, 4H), 7.71 (d,  $J = 7.9$  Hz, 2H), 7.33 (t,  $J = 8.0$  Hz, 2H), 7.16 (d,  $J = 7.4$  Hz, 1H), 6.99 (dd,  $J = 8.9, 2.4$  Hz, 4H), 3.83 (s, 6H).  $^{13}\text{C}$  NMR (101 MHz,  $\text{CDCl}_3$ )  $\delta$  168.8 (d,  $J = 124.1$  Hz), 163.1, 136.9, 136.8, 133.8, 133.6, 129.0, 125.3, 120.4, 119.8, 119.4, 114.4, 114.2, 55.3.  $^{31}\text{P}$  NMR (162 MHz,  $\text{CDCl}_3$ )  $\delta$  16.8. HRMS (ESI-TOF)  $m/z$ :  $[\text{M} + \text{H}]^+$  Calcd for  $\text{C}_{21}\text{H}_{21}\text{NO}_4\text{P}^+$ : 404.1022, found 404.1032.

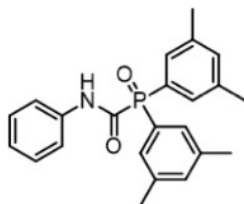

### 1-(bis(3,5-dimethylphenyl)phosphoryl)-*N*-phenylformamide (3n)

$^1\text{H}$  NMR (400 MHz, DMSO)  $\delta$  10.89 (s, 1H), 7.80 (d,  $J = 7.9$  Hz, 2H), 7.44 (d,  $J = 12.1$  Hz, 4H), 7.34 (t,  $J = 7.9$  Hz, 2H), 7.29 (s, 2H), 7.15 (s, 1H), 2.33 (s, 12H).  $^{13}\text{C}$  NMR (101 MHz, DMSO)  $\delta$  169.3 (d,  $J = 122.1$  Hz), 169.3 (d,  $J = 122.1$  Hz), 138.6 (d,  $J = 12.5$  Hz), 137.8 (d,  $J = 9.5$  Hz), 134.6, 130.7, 129.7, 129.3, 129.2, 129.2, 125.6, 121.3, 21.3.  $^{31}\text{P}$  NMR (162 MHz, DMSO)  $\delta$  14.9. HRMS (ESI-TOF)  $m/z$ :  $[\text{M} + \text{Na}]^+$  Calcd for  $\text{C}_{23}\text{H}_{24}\text{NO}_2\text{PNa}^+$ : 400.1437, found 400.1436.



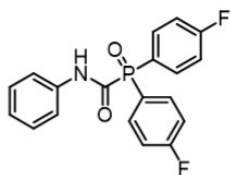

**1-(bis(4-fluorophenyl)phosphoryl)-N-phenylformamide (3o)**

$^1\text{H}$  NMR (400 MHz,  $\text{CDCl}_3$ )  $\delta$  9.56 (s, 1H), 8.05 – 7.87 (m, 4H), 7.69 (d,  $J = 7.9$  Hz, 2H), 7.35 (t,  $J = 8.0$  Hz, 2H), 7.25 – 7.11 (m, 5H).  $^{13}\text{C}$  NMR (101 MHz,  $\text{CDCl}_3$ )  $\delta$  167.6 (d,  $J = 125.3$  Hz), 164.5, 164.4, 136.6, 136.5, 134.5, 134.4, 134.3, 129.2, 125.8, 125.1, 125.0, 124.0, 119.9, 116.5 (d,  $J = 13.6$  Hz), 116.3 (d,  $J = 13.7$  Hz).  $^{31}\text{P}$  NMR (162 MHz,  $\text{CDCl}_3$ )  $\delta$  14.0. HRMS (ESI-TOF)  $m/z$ :  $[\text{M} + \text{Na}]^+$  Calcd for  $\text{C}_{19}\text{H}_{14}\text{F}_2\text{NO}_2\text{PNa}^+$ : 380.0622, found 380.0630.

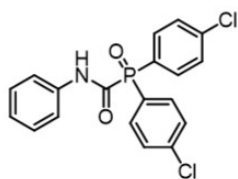

**1-(bis(4-chlorophenyl)phosphoryl)-N-phenylformamide (3p)**

$^1\text{H}$  NMR (400 MHz,  $\text{CDCl}_3$ )  $\delta$  9.54 (s, 1H), 7.87 (dd,  $J = 11.6, 8.5$  Hz, 4H), 7.68 (d,  $J = 8.0$  Hz, 2H), 7.49 (dd,  $J = 8.4, 2.3$  Hz, 4H), 7.35 (t,  $J = 7.9$  Hz, 2H), 7.19 (s, 1H).  $^{13}\text{C}$  NMR (101 MHz,  $\text{CDCl}_3$ )  $\delta$  167.2 (d,  $J = 125.2$  Hz), 139.9, 136.5, 136.4, 133.1, 133.0, 129.3, 129.2, 127.4, 126.4, 125.9, 120.0.  $^{31}\text{P}$  NMR (162 MHz,  $\text{CDCl}_3$ )  $\delta$  13.7. HRMS (ESI-TOF)  $m/z$ :  $[\text{M} + \text{Na}]^+$  Calcd for  $\text{C}_{19}\text{H}_{14}\text{Cl}_2\text{NO}_2\text{PNa}^+$ : 412.0031, found 412.0039.

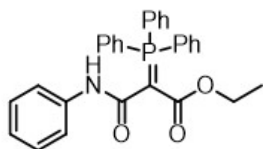

**ethyl 3-oxo-3-(phenylamino)-2-(triphenyl- $\lambda^5$ -phosphaneylidene)propanoate (5a)**

$^1\text{H}$  NMR (400 MHz,  $\text{CDCl}_3$ )  $\delta$  10.91 (s, 1H), 7.80 – 7.54 (m, 6H), 7.54 – 7.29 (m, 11H), 7.16 – 7.01 (m, 2H), 6.85 – 6.70 (m, 1H), 3.62 (q,  $J = 7.1$  Hz, 2H), 0.44 (t,  $J = 7.1$  Hz, 3H).  $^{13}\text{C}$  NMR (101 MHz,  $\text{CDCl}_3$ )  $\delta$  170.1, 170.0, 168.1, 168.0, 140.0, 139.9, 133.2, 133.1, 131.5, 131.5, 128.4, 128.3, 127.8, 126.9, 121.6, 119.3, 58.2, 56.7 (d,  $J = 127.8$  Hz), 13.51.  $^{31}\text{P}$  NMR (162 MHz,  $\text{CDCl}_3$ )  $\delta$  18.5. HRMS (ESI-TOF)  $m/z$ :  $[\text{M} + \text{H}]^+$  Calcd for  $\text{C}_{29}\text{H}_{27}\text{NO}_3\text{P}^+$ : 468.1723, found 468.1731.

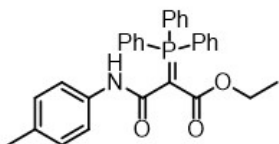

**ethyl 3-oxo-3-(p-tolylamino)-2-(triphenyl- $\lambda^5$ -phosphaneylidene)propanoate (5b)**

$^1\text{H}$  NMR (400 MHz,  $\text{CDCl}_3$ )  $\delta$  10.91 (s, 1H), 7.83 – 7.62 (m, 6H), 7.55 – 7.45 (m, 3H), 7.45 – 7.36 (m, 8H), 6.97 (d,  $J = 8.3$  Hz, 2H), 3.69 (q,  $J = 7.1$  Hz, 2H), 2.21 (s, 3H), 0.52 (t,  $J = 7.1$  Hz, 3H).  $^{13}\text{C}$  NMR (101 MHz,  $\text{CDCl}_3$ )  $\delta$  170.1, 169.9, 168.0, 167.9,

137.4, 137.4, 133.2, 133.1, 131.4, 131.4, 130.8, 128.9, 128.36, 128.2, 127.8, 126.9, 119.2, 58.1, 56.5 (d,  $J = 127.9$  Hz), 20.6, 13.5.  $^{31}\text{P}$  NMR (162 MHz,  $\text{CDCl}_3$ )  $\delta$  18.4. HRMS (ESI-TOF)  $m/z$ :  $[\text{M} + \text{H}]^+$  Calcd for  $\text{C}_{30}\text{H}_{29}\text{NO}_3\text{P}^+$ : 482.1880, found 482.1888.

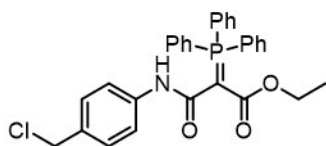

**ethyl 3-((4-(chloromethyl)phenyl)amino)-3-oxo-2-(triphenyl- $\lambda^5$ -phosphaneylidene)propanoate (5c)**

$^1\text{H}$  NMR (400 MHz,  $\text{CDCl}_3$ )  $\delta$  11.07 (s, 1H), 8.07 – 7.96 (m, 2H), 7.77 – 7.65 (m, 6H), 7.52 (ddd,  $J = 5.2, 3.1, 1.6$  Hz, 5H), 7.44 – 7.36 (m, 4H), 7.30 – 7.23 (m, 2H), 5.24 (s, 2H), 3.70 (q,  $J = 7.1$  Hz, 2H), 0.53 (t,  $J = 7.1$  Hz, 3H).  $^{13}\text{C}$  NMR (101 MHz,  $\text{CDCl}_3$ )  $\delta$  170.2, 170.1, 168.2, 168.1, 166.5, 140.2, 140.2, 133.3, 133.2, 132.8, 131.6, 131.6, 130.3, 129.6, 129.1, 128.9, 128.5, 128.4, 128.2, 127.7, 126.8, 119.3, 66.8, 58.3, 56.9 (d,  $J = 127.7$  Hz), 13.5.  $^{31}\text{P}$  NMR (162 MHz,  $\text{CDCl}_3$ )  $\delta$  18.5. HRMS (ESI-TOF)  $m/z$ :  $[\text{M} + \text{H}]^+$  Calcd for  $\text{C}_{30}\text{H}_{28}\text{ClNO}_3\text{P}^+$ : 516.1490, found 516.1500.

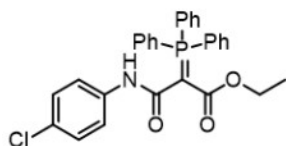

**Ethyl 3-((4-chlorophenyl)amino)-3-oxo-2-(triphenyl- $\lambda^5$ -phosphaneylidene)propanoate (5d)**

$^1\text{H}$  NMR (400 MHz,  $\text{CDCl}_3$ )  $\delta$  11.07 (s, 1H), 7.70 (ddd,  $J = 12.7, 5.2, 3.3$  Hz, 6H), 7.52 (ddt,  $J = 8.6, 3.1, 1.6$  Hz, 3H), 7.48 – 7.38 (m, 8H), 7.13 – 7.06 (m, 2H), 3.70 (q,  $J = 7.1$  Hz, 2H), 0.53 (t,  $J = 7.1$  Hz, 3H).  $^{13}\text{C}$  NMR (101 MHz,  $\text{CDCl}_3$ )  $\delta$  170.2, 170.1, 168.2, 168.1, 138.6, 138.5, 133.2, 133.1, 131.7, 131.6, 128.5, 128.4, 128.3, 127.5, 126.6, 126.3, 120.5, 58.3, 56.8 (d,  $J = 127.2$  Hz), 13.5.  $^{31}\text{P}$  NMR (162 MHz,  $\text{CDCl}_3$ )  $\delta$  18.6. HRMS (ESI-TOF)  $m/z$ :  $[\text{M} + \text{H}]^+$  Calcd for  $\text{C}_{29}\text{H}_{26}\text{ClNO}_3\text{P}^+$ : 502.1333, found 502.1338.

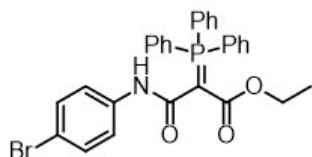

**ethyl 3-((4-bromophenyl)amino)-3-oxo-2-(triphenyl- $\lambda^5$ -phosphaneylidene)propanoate (5e)**

$^1\text{H}$  NMR (400 MHz,  $\text{CDCl}_3$ )  $\delta$  11.04 (s, 1H), 7.71 (dd,  $J = 12.7, 8.0$  Hz, 6H), 7.64 – 7.35 (m, 11H), 7.35 – 7.09 (m, 2H), 3.69 (q,  $J = 7.1$  Hz, 2H), 0.53 (t,  $J = 7.1$  Hz, 3H).  $^{13}\text{C}$  NMR (101 MHz,  $\text{CDCl}_3$ )  $\delta$  170.1, 168.1, 139.2, 133.3, 133.2, 131.7, 131.7, 131.4, 128.6, 128.5, 127.6, 126.7, 120.9, 113.9, 58.4, 56.9 (d,  $J = 127.2$  Hz), 13.6.  $^{31}\text{P}$  NMR (162 MHz,  $\text{CDCl}_3$ )  $\delta$  18.5. HRMS (ESI-TOF)  $m/z$ :  $[\text{M} + \text{H}]^+$  Calcd for  $\text{C}_{29}\text{H}_{26}\text{BrNO}_3\text{P}^+$ : 546.0828, found 546.0834.

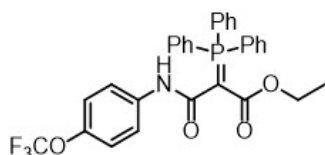

**ethyl 3-oxo-3-((4-(trifluoromethoxy)phenyl)amino)-2-(triphenyl- $\lambda^5$ -phosphane-ylidene)propanoate (5f)**

$^1\text{H}$  NMR (400 MHz,  $\text{CDCl}_3$ )  $\delta$  11.08 (s, 1H), 7.71 (ddd,  $J = 12.7, 5.2, 3.3$  Hz, 6H), 7.62 – 7.39 (m, 11H), 7.02 (d,  $J = 8.4$  Hz, 2H), 3.70 (q,  $J = 7.1$  Hz, 2H), 0.53 (t,  $J = 7.1$  Hz, 3H).  $^{13}\text{C}$  NMR (101 MHz,  $\text{CDCl}_3$ )  $\delta$  170.3, 170.2, 168.3, 168.2, 143.5, 138.9, 133.4, 133.3, 131.8, 131.7, 128.6, 128.5, 127.7, 126.7, 121.5, 120.2, 77.4, 58.4, 56.9 (d,  $J = 127.3$  Hz), 13.6.  $^{31}\text{P}$  NMR (162 MHz,  $\text{CDCl}_3$ )  $\delta$  18.5. HRMS (ESI-TOF)  $m/z$ :  $[\text{M} + \text{H}]^+$  Calcd for  $\text{C}_{30}\text{H}_{26}\text{F}_3\text{NO}_4\text{P}^+$ : 552.1546, found 552.1556.

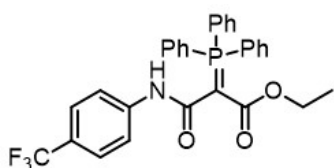

**ethyl 3-oxo-3-((4-(trifluoromethyl)phenyl)amino)-2-(triphenyl- $\lambda^5$ -phosphane-ylidene)propanoate (5g)**

$^1\text{H}$  NMR (400 MHz,  $\text{CDCl}_3$ )  $\delta$  11.20 (s, 1H), 7.70 – 7.57 (m, 6H), 7.52 (d,  $J = 8.5$  Hz, 2H), 7.49 – 7.43 (m, 3H), 7.42 – 7.35 (m, 6H), 7.33 (d,  $J = 8.6$  Hz, 2H), 3.63 (q,  $J = 7.1$  Hz, 2H), 0.45 (t,  $J = 7.1$  Hz, 3H).  $^{13}\text{C}$  NMR (101 MHz,  $\text{CDCl}_3$ )  $\delta$  170.3, 170.1, 168.3, 168.2, 143.2, 133.3, 133.2, 131.8, 131.7, 128.6, 128.5, 127.4, 126.5, 125.8, 125.7, 123.3, 123.2, 123.0, 118.7, 114.1, 58.6, 57.2 (d,  $J = 127.0$  Hz), 13.5.  $^{31}\text{P}$  NMR (162 MHz,  $\text{CDCl}_3$ )  $\delta$  18.6. HRMS (ESI-TOF)  $m/z$ :  $[\text{M} + \text{H}]^+$  Calcd for  $\text{C}_{30}\text{H}_{26}\text{F}_3\text{NO}_4\text{P}^+$ : 536.1597, found 536.1606.

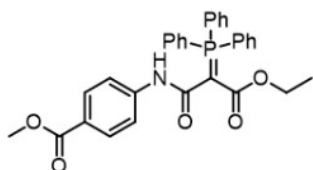

**methyl 4-(3-ethoxy-3-oxo-2-(triphenyl- $\lambda^5$ -phosphaneylidene)propanamido)benzoate (5h)**

$^1\text{H}$  NMR (400 MHz,  $\text{CDCl}_3$ )  $\delta$  11.27 (s, 1H), 7.79 (d,  $J = 8.8$  Hz, 2H), 7.69 – 7.59 (m, 6H), 7.54 – 7.42 (m, 5H), 7.41 – 7.33 (m, 6H), 3.74 (s, 3H), 3.63 (q,  $J = 7.1$  Hz, 2H), 0.46 (t,  $J = 7.1$  Hz, 3H).  $^{13}\text{C}$  NMR (101 MHz,  $\text{CDCl}_3$ )  $\delta$  170.1, 170.0, 168.2, 168.1, 166.9, 144.4, 133.2, 133.1, 131.7, 131.6, 130.4, 128.5, 128.4, 127.2, 126.3, 122.6, 118.1, 58.4, 57.3 (d,  $J = 126.5$  Hz), 51.5, 13.4.  $^{31}\text{P}$  NMR (162 MHz,  $\text{CDCl}_3$ )  $\delta$  18.7. HRMS (ESI-TOF)  $m/z$ :  $[\text{M} + \text{H}]^+$  Calcd for  $\text{C}_{31}\text{H}_{29}\text{NO}_5\text{P}^+$ : 526.1778, found 526.1785.

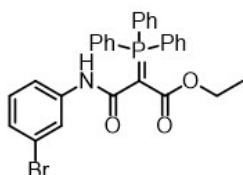

**ethyl 3-((3-bromophenyl)amino)-3-oxo-2-(triphenyl- $\lambda^5$ -phosphaneylidene)-propanoate (5i)**

$^1\text{H}$  NMR (400 MHz,  $\text{CDCl}_3$ )  $\delta$  11.03 (s, 1H), 7.71 (d,  $J = 1.5$  Hz, 1H), 7.68 – 7.56 (m, 6H), 7.50 – 7.31 (m, 9H), 7.31 – 7.21 (m, 1H), 6.99 – 6.88 (m, 2H), 3.61 (q,  $J = 7.1$  Hz, 2H), 0.44 (t,  $J = 7.1$  Hz, 3H).  $^{13}\text{C}$  NMR (101 MHz,  $\text{CDCl}_3$ )  $\delta$  170.2, 170.1, 168.1, 168.0, 141.4, 133.3, 133.2, 131.70, 131.7, 129.7, 128.6, 128.4, 127.5, 126.5, 124.5, 122.3, 121.9, 117.7, 58.4, 56.9 (d,  $J = 127.1$  Hz), 13.5.  $^{31}\text{P}$  NMR (162 MHz,  $\text{CDCl}_3$ )  $\delta$  18.7. HRMS (ESI-TOF)  $m/z$ :  $[\text{M} + \text{H}]^+$  Calcd for  $\text{C}_{29}\text{H}_{26}\text{BrNO}_3\text{P}^+$ : 546.0828, found 546.0834.

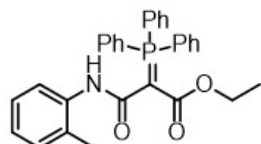

**ethyl 3-oxo-3-(o-tolylamino)-2-(triphenyl- $\lambda^5$ -phosphaneylidene)propanoate (5j)**

$^1\text{H}$  NMR (400 MHz,  $\text{CDCl}_3$ )  $\delta$  10.86 (s, 1H), 8.05 (d,  $J = 8.1$  Hz, 1H), 7.79 – 7.63 (m, 6H), 7.56 – 7.36 (m, 9H), 7.10 (d,  $J = 7.3$  Hz, 1H), 7.01 (t,  $J = 7.7$  Hz, 1H), 6.83 (td,  $J = 7.4, 0.9$  Hz, 1H), 3.72 (q,  $J = 7.1$  Hz, 2H), 2.40 (s, 3H), 0.51 (t,  $J = 7.1$  Hz, 3H).  $^{13}\text{C}$  NMR (101 MHz,  $\text{CDCl}_3$ )  $\delta$  170.3, 170.1, 168.1, 168.0, 138.5, 138.4, 133.2, 133.1, 131.5, 129.8, 128.4, 128.3, 127.9, 127.0, 126.4, 126.1, 121.7, 120.4, 58.2, 57.0 (d,  $J = 127.8$  Hz), 18.5, 13.5.  $^{31}\text{P}$  NMR (162 MHz,  $\text{CDCl}_3$ )  $\delta$  18.5. HRMS (ESI-TOF)  $m/z$ :  $[\text{M} + \text{H}]^+$  Calcd for  $\text{C}_{30}\text{H}_{29}\text{NO}_3\text{P}^+$ : 482.1880, found 482.1888.

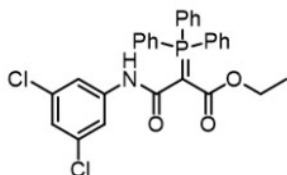

**ethyl 3-((3,5-dichlorophenyl)amino)-3-oxo-2-(triphenyl- $\lambda^5$ -phosphaneylidene)-propanoate (5k)**

$^1\text{H}$  NMR (400 MHz,  $\text{CDCl}_3$ )  $\delta$  11.25 (s, 1H), 7.77 – 7.64 (m, 6H), 7.59 – 7.50 (m, 3H), 7.50 – 7.41 (m, 8H), 6.85 (t,  $J = 1.8$  Hz, 1H), 3.69 (q,  $J = 7.1$  Hz, 2H), 0.52 (t,  $J = 7.1$  Hz, 3H).  $^{13}\text{C}$  NMR (101 MHz,  $\text{CDCl}_3$ )  $\delta$  170.3, 170.2, 168.1, 168.0, 141.9, 134.5, 133.3, 133.2, 131.8, 128.6, 128.5, 127.2, 126.2, 121.3, 117.2, 58.5, 57.0 (d,  $J = 126.6$  Hz), 13.5.  $^{31}\text{P}$  NMR (162 MHz,  $\text{CDCl}_3$ )  $\delta$  18.7. HRMS (ESI-TOF)  $m/z$ :  $[\text{M} + \text{H}]^+$  Calcd for  $\text{C}_{30}\text{H}_{29}\text{NO}_3\text{P}^+$ : 536.0944, found 536.0950.

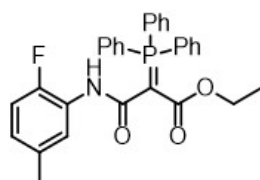

**ethyl 3-((2-fluoro-5-methylphenyl)amino)-3-oxo-2-(triphenyl- $\lambda^5$ -phosphane-ylidene) propanoate (5l)**

$^1\text{H}$  NMR (400 MHz,  $\text{CDCl}_3$ )  $\delta$  11.22 (s, 1H), 8.03 (dd,  $J = 7.7, 1.9$  Hz, 1H), 7.85 – 7.64 (m, 6H), 7.60 – 7.38 (m, 9H), 6.89 (dd,  $J = 11.0, 8.3$  Hz, 1H), 6.69 – 6.47 (m, 1H), 3.73

(q,  $J = 7.1$  Hz, 2H), 2.15 (s, 3H), 0.53 (t,  $J = 7.1$  Hz, 3H).  $^{13}\text{C}$  NMR (101 MHz,  $\text{CDCl}_3$ )  $\delta$  170.0, 169.9, 168.0, 167.9, 151.7, 149.4, 133.3, 133.3, 133.2, 131.6, 131.6, 128.5, 128.4, 128.4, 128.1, 128.0, 127.6, 126.6, 121.7, 121.6, 121.3, 113.9, 113.7, 58.3, 56.9 (d,  $J = 127.4$  Hz), 20.9, 13.5.  $^{31}\text{P}$  NMR (162 MHz,  $\text{CDCl}_3$ )  $\delta$  18.7. HRMS (ESI-TOF)  $m/z$ :  $[\text{M}+\text{H}]^+$  Calcd for  $\text{C}_{30}\text{H}_{28}\text{FNO}_3\text{P}^+$ : 500.1785, found 500.1793.

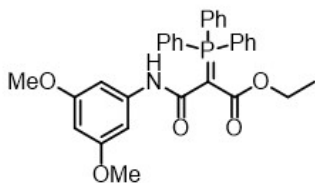

**ethyl 3-((3,5-dimethoxyphenyl)amino)-3-oxo-2-(triphenyl- $\lambda^5$ -phosphaneylidene)propanoate (5m)**

$^1\text{H}$  NMR (400 MHz,  $\text{CDCl}_3$ )  $\delta$  10.95 (s, 1H), 7.73 – 7.53 (m, 6H), 7.51 – 7.39 (m, 3H), 7.39 – 7.29 (m, 6H), 6.67 (d,  $J = 2.3$  Hz, 2H), 5.98 (t,  $J = 2.3$  Hz, 1H), 3.77 – 3.42 (m, 8H), 0.43 (t,  $J = 7.1$  Hz, 3H).  $^{31}\text{P}$  NMR (162 MHz,  $\text{CDCl}_3$ )  $\delta$  18.62.  $^{13}\text{C}$  NMR (101 MHz,  $\text{CDCl}_3$ )  $\delta$  170.2, 170.0, 168.0, 167.9, 160.7, 141.7, 141.7, 133.3, 133.2, 131.6, 131.5, 128.4, 128.3, 127.6, 126.7, 97.4, 94.7, 58.2, 56.7 (d,  $J = 127.3$  Hz), 55.2, 13.5.  $^{31}\text{P}$  NMR (162 MHz,  $\text{CDCl}_3$ )  $\delta$  18.6. HRMS (ESI-TOF)  $m/z$ :  $[\text{M}+\text{H}]^+$  Calcd for  $\text{C}_{31}\text{H}_{31}\text{NO}_5\text{P}^+$ : 528.1934, found 528.1940.

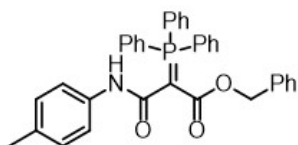

**benzyl 3-oxo-3-(*p*-tolylamino)-2-(triphenyl- $\lambda^5$ -phosphaneylidene)propanoate (5n)**

$^1\text{H}$  NMR (400 MHz,  $\text{CDCl}_3$ )  $\delta$  10.73 (s, 1H), 7.63 – 7.50 (m, 6H), 7.42 – 7.21 (m, 11H), 7.12 – 7.01 (m, 3H), 6.89 (d,  $J = 8.3$  Hz, 2H), 6.73 (dd,  $J = 7.5, 1.5$  Hz, 2H), 4.59 (s, 2H), 2.13 (s, 3H).  $^{13}\text{C}$  NMR (101 MHz,  $\text{CDCl}_3$ )  $\delta$  169.6 (d,  $J = 12.6$  Hz), 167.8 (d,  $J = 9.5$  Hz), 137.4, 137.3, 136.5, 133.1, 133.0, 131.5, 131.4, 131.0, 128.9, 128.4, 128.2, 128.0, 127.6, 127.4, 126.7, 119.4, 64.4, 56.7 (d,  $J = 127.8$  Hz), 20.7.  $^{31}\text{P}$  NMR (162 MHz,  $\text{CDCl}_3$ )  $\delta$  18.5. HRMS (ESI-TOF)  $m/z$ :  $[\text{M}+\text{H}]^+$  Calcd for  $\text{C}_{35}\text{H}_{31}\text{NO}_3\text{P}^+$ : 544.2036, found 544.2047.

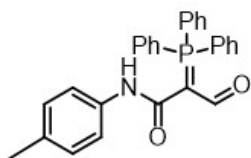

**3-oxo-*N*-(*p*-tolyl)-2-(triphenyl- $\lambda^5$ -phosphaneylidene)propenamide (5o)**

$^1\text{H}$  NMR (400 MHz,  $\text{CDCl}_3$ )  $\delta$  11.72 (s, 1H), 8.18 (d,  $J = 3.7$  Hz, 1H), 7.74 – 7.63 (m, 6H), 7.63 – 7.56 (m, 3H), 7.56 – 7.46 (m, 8H), 7.03 (d,  $J = 8.3$  Hz, 2H), 2.25 (s, 3H).  $^{13}\text{C}$  NMR (101 MHz,  $\text{CDCl}_3$ )  $\delta$  183.2, 182.9, 166.5, 166.4, 136.9, 133.8, 133.7, 132.7, 132.6, 131.7, 129.1, 129.0, 124.5, 123.6, 119.8, 78.5, 20.7.  $^{31}\text{P}$  NMR (162 MHz,  $\text{CDCl}_3$ )  $\delta$  22.1. HRMS (ESI-TOF)  $m/z$ :  $[\text{M}+\text{H}]^+$  Calcd for  $\text{C}_{28}\text{H}_{25}\text{NO}_2\text{P}^+$ : 438.1617, found 438.1625.

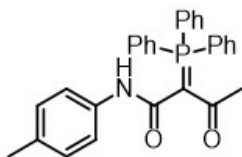

**3-oxo-*N*-(*p*-tolyl)-2-(triphenyl- $\lambda^5$ -phosphaneylidene)butanamide (5p)**

$^1\text{H}$  NMR (400 MHz,  $\text{CDCl}_3$ )  $\delta$  12.22 (s, 1H), 7.84 – 7.56 (m, 6H), 7.56 – 7.34 (m, 9H), 7.29 (d,  $J = 8.4$  Hz, 2H), 6.89 (d,  $J = 8.3$  Hz, 2H), 2.13 (s, 3H), 1.30 (s, 4H).  $^{13}\text{C}$  NMR (101 MHz,  $\text{CDCl}_3$ )  $\delta$  191.4, 191.2, 168.1, 168.0, 137.1, 137.1, 133.3, 133.2, 132.0, 131.9, 131.3, 128.9, 128.8, 127.9, 126.9, 119.2, 75.5, 29.4, 29.4, 20.7.  $^{31}\text{P}$  NMR (162 MHz,  $\text{CDCl}_3$ )  $\delta$  17.1. HRMS (ESI-TOF)  $m/z$ :  $[\text{M}+\text{H}]^+$  Calcd for  $\text{C}_{29}\text{H}_{27}\text{NO}_2\text{P}^+$ : 452.1774, found 452.1780.

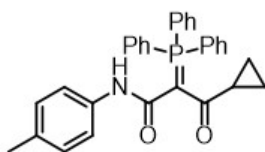

**3-cyclopropyl-3-oxo-*N*-(*p*-tolyl)-2-(triphenyl- $\lambda^5$ -phosphaneylidene)propenamide (5q)**

$^1\text{H}$  NMR (400 MHz,  $\text{CDCl}_3$ )  $\delta$  11.94 (s, 1H), 7.86 – 7.53 (m, 6H), 7.51 – 7.33 (m, 9H), 7.28 (d,  $J = 8.4$  Hz, 2H), 6.87 (d,  $J = 8.2$  Hz, 2H), 2.12 (s, 3H), 0.77 (qd,  $J = 7.7, 3.8$  Hz, 3H), -0.02 (dt,  $J = 32.0, 14.0$  Hz, 2H).  $^{13}\text{C}$  NMR (101 MHz,  $\text{CDCl}_3$ )  $\delta$  193.3 (d,  $J = 18.2$  Hz), 167.5 (d,  $J = 9.6$  Hz), 137.3, 133.3, 133.2, 131.8, 131.1, 128.9, 128.8, 128.7, 127.8, 126.8, 119.6, 75.2 (d,  $J = 120.2$  Hz), 20.7, 20.7, 9.6.  $^{31}\text{P}$  NMR (162 MHz,  $\text{CDCl}_3$ )  $\delta$  17.5. HRMS (ESI-TOF)  $m/z$ :  $[\text{M}+\text{H}]^+$  Calcd for  $\text{C}_{31}\text{H}_{29}\text{NO}_2\text{P}^+$ : 478.1930, found 478.1934.

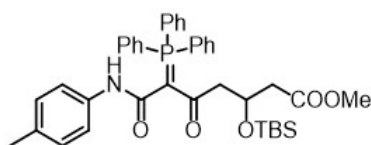

**methyl 3-((tert-butyldimethylsilyl)oxy)-5,7-dioxo-7-(*p*-tolylamino)-6-(triphenyl- $\lambda^5$ -phosphaneylidene)heptanoate (5r)**

$^1\text{H}$  NMR (400 MHz,  $\text{CDCl}_3$ )  $\delta$  12.15 (s, 1H), 7.82 – 7.70 (m, 6H), 7.55 (dd,  $J = 7.4, 1.4$  Hz, 3H), 7.51 – 7.46 (m, 6H), 7.38 (d,  $J = 8.3$  Hz, 2H), 6.99 (d,  $J = 8.3$  Hz, 2H), 4.62 (dd,  $J = 6.8, 5.0$  Hz, 1H), 3.59 (s, 3H), 2.37 (dd,  $J = 14.2, 4.7$  Hz, 1H), 2.26 (d,  $J = 10.0$  Hz, 3H), 2.22 – 2.11 (m, 1H), 1.74 (d,  $J = 55.8$  Hz, 2H), 0.75 (s, 9H), -0.00 (s, 3H), -0.06 (s, 3H).  $^{13}\text{C}$  NMR (101 MHz,  $\text{CDCl}_3$ )  $\delta$  171.6, 137.2, 133.5, 133.4, 132.1, 131.6, 129.1, 129.0, 128.9, 128.6, 128.5, 127.9, 127.0, 119.9, 67.2, 51.4, 48.2, 42.8, 25.8, 20.8, 17.9, 0.5 (d,  $J = 102.8$  Hz), -4.9 (d,  $J = 53.0$  Hz).  $^{31}\text{P}$  NMR (162 MHz,  $\text{CDCl}_3$ )  $\delta$  16.5. HRMS (ESI-TOF)  $m/z$ :  $[\text{M}+\text{H}]^+$  Calcd for  $\text{C}_{39}\text{H}_{47}\text{NO}_5\text{PSi}^+$ : 668.2956, found 668.2965.

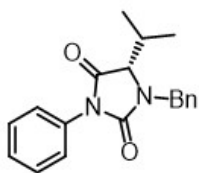

**1-benzyl-5-isopropyl-3-phenylimidazolidine-2,4-dione (7a)**

$^1\text{H}$  NMR (400 MHz,  $\text{CDCl}_3$ )  $\delta$  7.45 – 7.20 (m, 10H), 5.07 (d,  $J = 15.2$  Hz, 1H), 4.08 (d,  $J = 15.2$  Hz, 1H), 3.72 (d,  $J = 3.1$  Hz, 1H), 2.22 (ddd,  $J = 10.8, 7.0, 3.5$  Hz, 1H), 1.08 (d,  $J = 7.1$  Hz, 3H), 0.89 (d,  $J = 6.9$  Hz, 3H).  $^{13}\text{C}$  NMR (101 MHz,  $\text{CDCl}_3$ )  $\delta$  170.9, 155.9, 135.5, 131.7, 128.9, 128.2, 128.1, 128.0, 126.0, 62.9, 44.9, 28.6, 17.5, 16.0. HRMS (ESI-TOF)  $m/z$ :  $[\text{M} + \text{H}]^+$  Calcd for  $\text{C}_{19}\text{H}_{21}\text{N}_2\text{O}_2^+$ : 309.1598, found 309.1608.

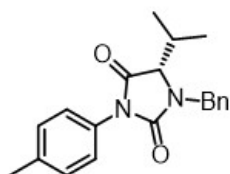

**1-benzyl-5-isopropyl-3-(p-tolyl)imidazolidine-2,4-dione (7b)**

$^1\text{H}$  NMR (400 MHz,  $\text{CDCl}_3$ )  $\delta$  7.35 – 7.11 (m, 9H), 5.14 (d,  $J = 15.2$  Hz, 1H), 4.15 (d,  $J = 15.3$  Hz, 1H), 3.78 (d,  $J = 3.1$  Hz, 1H), 2.36 (s, 3H), 2.29 (dtd,  $J = 14.0, 7.0, 3.2$  Hz, 1H), 1.15 (d,  $J = 7.1$  Hz, 3H), 0.96 (d,  $J = 6.9$  Hz, 3H).  $^{13}\text{C}$  NMR (101 MHz,  $\text{CDCl}_3$ )  $\delta$  170.9, 156.0, 138.0, 135.5, 129.5, 129.0, 128.9, 128.1, 128.0, 125.9, 62.9, 44.8, 28.5, 21.1, 17.4, 16.0. HRMS (ESI-TOF)  $m/z$ :  $[\text{M} + \text{H}]^+$  Calcd for  $\text{C}_{20}\text{H}_{23}\text{N}_2\text{O}_2^+$ : 323.1754, found 323.1760.

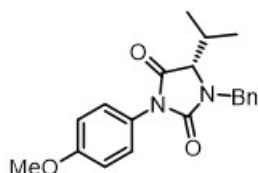

**1-benzyl-5-isopropyl-3-(4-methoxyphenyl)imidazolidine-2,4-dione (7c)**

$^1\text{H}$  NMR (400 MHz,  $\text{CDCl}_3$ )  $\delta$  7.50 – 7.21 (m, 7H), 7.10 – 6.72 (m, 2H), 5.14 (d,  $J = 15.2$  Hz, 1H), 4.16 (d,  $J = 15.2$  Hz, 1H), 3.90 – 3.67 (m, 4H), 2.30 (dtd,  $J = 14.0, 7.0, 3.1$  Hz, 1H), 1.15 (d,  $J = 7.0$  Hz, 3H), 0.97 (d,  $J = 6.9$  Hz, 3H).  $^{13}\text{C}$  NMR (101 MHz,  $\text{CDCl}_3$ )  $\delta$  171.12, 159.08, 156.18, 135.54, 128.89, 128.14, 128.03, 127.45, 124.33, 114.25, 62.90, 55.39, 44.85, 28.55, 17.46, 16.03. HRMS (ESI-TOF)  $m/z$ :  $[\text{M} + \text{H}]^+$  Calcd for  $\text{C}_{20}\text{H}_{23}\text{N}_2\text{O}_3^+$ : 339.1703, found 339.1709.

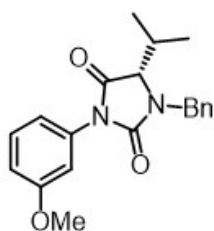

**1-benzyl-5-isopropyl-3-(3-methoxyphenyl)imidazolidine-2,4-dione (7d)**

$^1\text{H}$  NMR (400 MHz,  $\text{CDCl}_3$ )  $\delta$  7.46 – 7.26 (m, 6H), 6.95 (dddd,  $J = 24.0, 8.3, 2.1, 0.8$  Hz, 3H), 5.15 (d,  $J = 15.2$  Hz, 1H), 4.16 (d,  $J = 15.2$  Hz, 1H), 3.81 (s, 3H), 3.79 (d,  $J = 3.1$  Hz, 1H), 2.30 (dtd,  $J = 14.0, 7.0, 3.1$  Hz, 1H), 1.16 (d,  $J = 7.1$  Hz, 3H), 0.97 (d,  $J = 6.9$  Hz, 3H).  $^{13}\text{C}$  NMR (101 MHz,  $\text{CDCl}_3$ )  $\delta$  170.8, 159.9, 155.8, 135.5, 132.7, 129.6, 128.9, 128.2, 128.1, 118.3, 114.0, 111.8, 62.9, 55.3, 44.9, 28.6, 17.5, 16.0. HRMS (ESI-TOF)  $m/z$ :  $[\text{M}+\text{H}]^+$  Calcd for  $\text{C}_{20}\text{H}_{23}\text{N}_2\text{O}_3^+$ : 339.1703, found 339.1709.

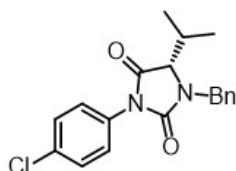

**1-benzyl-3-(4-chlorophenyl)-5-isopropylimidazolidine-2,4-dione (7e)**

$^1\text{H}$  NMR (400 MHz,  $\text{CDCl}_3$ )  $\delta$  7.47 – 7.27 (m, 9H), 5.15 (d,  $J = 15.2$  Hz, 1H), 4.16 (d,  $J = 15.2$  Hz, 1H), 3.80 (d,  $J = 3.1$  Hz, 1H), 2.31 (dtd,  $J = 14.0, 7.0, 3.1$  Hz, 1H), 1.16 (d,  $J = 7.1$  Hz, 3H), 0.96 (d,  $J = 6.9$  Hz, 3H).  $^{13}\text{C}$  NMR (101 MHz,  $\text{CDCl}_3$ )  $\delta$  170.6, 155.5, 135.3, 133.6, 130.2, 129.1, 129.0, 128.2, 127.2, 62.9, 44.9, 28.6, 17.5, 16.0. HRMS (ESI-TOF)  $m/z$ :  $[\text{M}+\text{H}]^+$  Calcd for  $\text{C}_{19}\text{H}_{20}\text{ClN}_2\text{O}_2^+$ : 343.1208, found 343.1213.

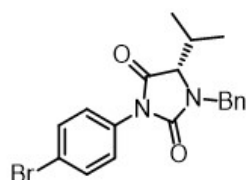

**1-benzyl-3-(4-bromophenyl)-5-isopropylimidazolidine-2,4-dione (7f)**

$^1\text{H}$  NMR (400 MHz,  $\text{CDCl}_3$ )  $\delta$  7.66 – 7.51 (m, 1H), 7.51 – 7.26 (m, 8H), 5.16 (dd,  $J = 15.2, 6.6$  Hz, 1H), 4.16 (dd,  $J = 15.2, 4.3$  Hz, 1H), 3.80 (t,  $J = 3.5$  Hz, 1H), 2.31 (dtd,  $J = 10.9, 7.0, 4.2$  Hz, 1H), 1.16 (d,  $J = 7.0$  Hz, 3H), 0.96 (d,  $J = 7.0$  Hz, 3H).  $^{13}\text{C}$  NMR (101 MHz,  $\text{CDCl}_3$ )  $\delta$  170.6, 155.5, 135.3, 132.1, 130.8, 129.0, 129.0, 128.2, 128.1, 128.1, 127.4, 126.1, 121.7, 63.0, 44.9, 28.7, 28.6, 17.5, 16.1, 16.0. HRMS (ESI-TOF)  $m/z$ :  $[\text{M}+\text{Na}]^+$  Calcd for  $\text{C}_{19}\text{H}_{19}\text{BrN}_2\text{NaO}_2^+$ : 409.0522, found 409.0528.

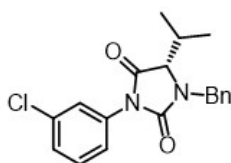

**1-benzyl-3-(3-chlorophenyl)-5-isopropylimidazolidine-2,4-dione (7g)**

$^1\text{H}$  NMR (400 MHz,  $\text{CDCl}_3$ )  $\delta$  7.44 – 7.36 (m, 1H), 7.35 – 7.18 (m, 8H), 5.06 (d,  $J = 15.2$  Hz, 1H), 4.07 (d,  $J = 15.2$  Hz, 1H), 3.72 (d,  $J = 3.1$  Hz, 1H), 2.22 (dtd,  $J = 14.0, 7.0, 3.2$  Hz, 1H), 1.07 (d,  $J = 7.1$  Hz, 3H), 0.88 (d,  $J = 6.9$  Hz, 3H).  $^{13}\text{C}$  NMR (101 MHz,  $\text{CDCl}_3$ )  $\delta$  170.5, 155.3, 135.3, 134.4, 132.8, 129.8, 129.0, 128.2, 128.1, 126.1, 124.0, 62.9, 44.8, 28.5, 17.5, 16.0. HRMS (ESI-TOF)  $m/z$ :  $[\text{M}+\text{H}]^+$  Calcd for  $\text{C}_{19}\text{H}_{20}\text{ClN}_2\text{O}_2^+$ : 343.1208, found 343.1213.



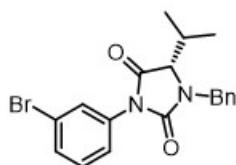

**1-benzyl-3-(3-bromophenyl)-5-isopropylimidazolidine-2,4-dione (7h)**

$^1\text{H}$  NMR (400 MHz,  $\text{CDCl}_3$ )  $\delta$  7.63 (t,  $J = 1.9$  Hz, 1H), 7.50 (ddd,  $J = 7.9, 1.8, 1.2$  Hz, 1H), 7.44 – 7.38 (m, 2H), 7.38 – 7.32 (m, 3H), 7.32 – 7.28 (m, 2H), 5.16 (d,  $J = 15.2$  Hz, 1H), 4.16 (d,  $J = 15.2$  Hz, 1H), 3.80 (d,  $J = 3.1$  Hz, 1H), 2.32 (dtd,  $J = 14.0, 7.0, 3.1$  Hz, 1H), 1.16 (d,  $J = 7.1$  Hz, 3H), 0.97 (d,  $J = 6.9$  Hz, 3H).  $^{13}\text{C}$  NMR (101 MHz,  $\text{CDCl}_3$ )  $\delta$  170.6, 155.3, 135.3, 132.9, 131.1, 130.2, 129.0, 128.9, 128.2, 124.6, 122.3, 62.9, 44.9, 28.6, 17.6, 16.1. HRMS (ESI-TOF)  $m/z$ :  $[\text{M} + \text{Na}]^+$  Calcd for  $\text{C}_{19}\text{H}_{19}\text{BrN}_2\text{NaO}_2^+$ : 409.0522, found 409.0528.

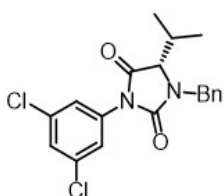

**1-benzyl-3-(3,5-dichlorophenyl)-5-isopropylimidazolidine-2,4-dione (7i)**

$^1\text{H}$  NMR (400 MHz,  $\text{CDCl}_3$ )  $\delta$  7.44 (d,  $J = 1.9$  Hz, 2H), 7.37 (dddd,  $J = 6.7, 5.7, 3.8, 2.0$  Hz, 4H), 7.28 (dd,  $J = 11.8, 5.4$  Hz, 2H), 5.15 (d,  $J = 15.2$  Hz, 1H), 4.15 (d,  $J = 15.2$  Hz, 1H), 3.80 (d,  $J = 3.2$  Hz, 1H), 2.31 (dtd,  $J = 14.0, 7.0, 3.2$  Hz, 1H), 1.16 (d,  $J = 7.1$  Hz, 3H), 0.96 (d,  $J = 6.9$  Hz, 3H).  $^{13}\text{C}$  NMR (101 MHz,  $\text{CDCl}_3$ )  $\delta$  170.2, 154.8, 135.1, 135.0, 133.5, 129.1, 128.3, 128.2, 128.0, 124.2, 62.9, 44.9, 28.6, 17.5, 16.0. HRMS (ESI-TOF)  $m/z$ :  $[\text{M} + \text{H}]^+$  Calcd for  $\text{C}_{19}\text{H}_{19}\text{Cl}_2\text{N}_2\text{O}_2^+$ : 377.0818, found 377.0821.

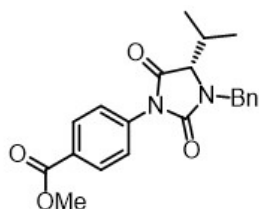

**methyl 4-(3-benzyl-4-isopropyl-2,5-dioxoimidazolidin-1-yl)benzoate (7j)**

$^1\text{H}$  NMR (400 MHz,  $\text{CDCl}_3$ )  $\delta$  8.20 – 8.06 (m, 2H), 7.66 – 7.51 (m, 2H), 7.44 – 7.28 (m, 5H), 5.18 (d,  $J = 15.2$  Hz, 1H), 4.17 (d,  $J = 15.2$  Hz, 1H), 3.93 (s, 3H), 3.82 (d,  $J = 3.1$  Hz, 1H), 2.33 (dtd,  $J = 14.0, 7.0, 3.2$  Hz, 1H), 1.17 (d,  $J = 7.0$  Hz, 3H), 0.98 (d,  $J = 6.9$  Hz, 3H).  $^{13}\text{C}$  NMR (101 MHz,  $\text{CDCl}_3$ )  $\delta$  170.5, 166.3, 155.3, 135.9, 135.3, 130.3, 129.2, 129.0, 128.3, 128.2, 125.4, 62.9, 52.3, 44.9, 28.6, 17.6, 16.1. HRMS (ESI-TOF)  $m/z$ :  $[\text{M} + \text{H}]^+$  Calcd for  $\text{C}_{21}\text{H}_{23}\text{N}_2\text{O}_4^+$ : 367.1652, found 367.1656.

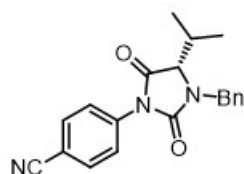

#### 4-(3-benzyl-4-isopropyl-2,5-dioxoimidazolidin-1-yl)benzonitrile (7k)

<sup>1</sup>H NMR (400 MHz, CDCl<sub>3</sub>) δ 7.72 – 7.56 (m, 4H), 7.35 – 7.20 (m, 5H), 5.08 (d, *J* = 15.2 Hz, 1H), 4.09 (d, *J* = 15.2 Hz, 1H), 3.75 (d, *J* = 3.1 Hz, 1H), 2.34 – 2.16 (m, 1H), 1.09 (d, *J* = 7.1 Hz, 3H), 0.88 (d, *J* = 6.9 Hz, 3H). <sup>13</sup>C NMR (101 MHz, CDCl<sub>3</sub>) δ 170.2, 154.8, 135.8, 135.0, 133.2, 132.7, 129.1, 128.3, 128.2, 125.9, 118.2, 111.1, 62.9, 44.9, 28.6, 17.5, 15.9. HRMS (ESI-TOF) *m/z*: [M+H]<sup>+</sup> Calcd for C<sub>20</sub>H<sub>20</sub>N<sub>3</sub>O<sub>2</sub><sup>+</sup>: 334.1550, found 334.1553.

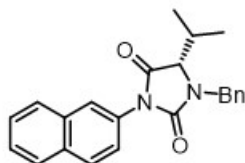

#### 1-benzyl-5-isopropyl-3-(naphthalen-2-yl)imidazolidine-2,4-dione (7l)

<sup>1</sup>H NMR (400 MHz, CDCl<sub>3</sub>) δ 7.87 – 7.80 (m, 2H), 7.76 (dd, *J* = 9.1, 5.0 Hz, 2H), 7.46 – 7.37 (m, 3H), 7.33 – 7.18 (m, 5H), 5.09 (d, *J* = 15.2 Hz, 1H), 4.09 (d, *J* = 15.2 Hz, 1H), 3.75 (d, *J* = 3.1 Hz, 1H), 2.24 (dtd, *J* = 14.0, 7.0, 3.1 Hz, 1H), 1.09 (d, *J* = 7.1 Hz, 3H), 0.92 (d, *J* = 6.9 Hz, 3H). <sup>13</sup>C NMR (101 MHz, CDCl<sub>3</sub>) δ 171.0, 156.0, 135.5, 133.1, 132.5, 129.2, 128.9, 128.8, 128.2, 128.1, 128.1, 127.6, 126.5, 126.4, 124.9, 123.7, 63.0, 44.9, 28.6, 17.5, 16.1. HRMS (ESI-TOF) *m/z*: [M+H]<sup>+</sup> Calcd for C<sub>23</sub>H<sub>23</sub>N<sub>2</sub>O<sub>2</sub><sup>+</sup>: 359.1754, found 359.1766.

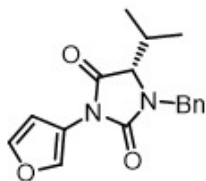

#### 1-benzyl-3-(furan-3-yl)-5-isopropylimidazolidine-2,4-dione (7m)

<sup>1</sup>H NMR (400 MHz, CDCl<sub>3</sub>) δ 7.45 – 7.27 (m, 6H), 6.49 (dd, *J* = 3.4, 2.1 Hz, 1H), 6.40 (dd, *J* = 3.4, 0.9 Hz, 1H), 5.13 (d, *J* = 15.2 Hz, 1H), 4.14 (d, *J* = 15.2 Hz, 1H), 3.80 (d, *J* = 3.2 Hz, 1H), 2.29 (dtd, *J* = 14.0, 7.0, 3.2 Hz, 1H), 1.15 (d, *J* = 7.1 Hz, 3H), 0.97 (d, *J* = 6.9 Hz, 3H). <sup>13</sup>C NMR (101 MHz, CDCl<sub>3</sub>) δ 170.1, 154.4, 141.5, 137.6, 135.1, 129.0, 128.2, 111.3, 106.5, 63.2, 44.9, 28.5, 17.5, 15.9. HRMS (ESI-TOF) *m/z*: [M+H]<sup>+</sup> Calcd for C<sub>17</sub>H<sub>19</sub>N<sub>2</sub>O<sub>3</sub><sup>+</sup>: 299.1390, found 299.1397.

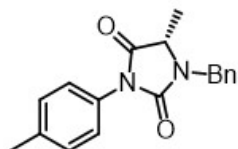

#### 1-benzyl-5-methyl-3-(p-tolyl)imidazolidine-2,4-dione (7n)

<sup>1</sup>H NMR (400 MHz, CDCl<sub>3</sub>) δ 7.44 – 7.20 (m, 9H), 5.05 (d, *J* = 15.2 Hz, 1H), 4.22 (d, *J* = 15.2 Hz, 1H), 3.92 (q, *J* = 6.9 Hz, 1H), 2.37 (s, 3H), 1.45 (d, *J* = 7.0 Hz, 3H). <sup>13</sup>C NMR (101 MHz, CDCl<sub>3</sub>) δ 172.5, 155.2, 138.0, 135.6, 129.6, 129.0, 128.9, 128.1, 128.1, 125.8, 54.5, 44.7, 21.1, 15.3. HRMS (ESI-TOF) *m/z*: [M+H]<sup>+</sup> Calcd for C<sub>18</sub>H<sub>19</sub>N<sub>2</sub>O<sub>2</sub><sup>+</sup>: 295.1441, found 295.1453.

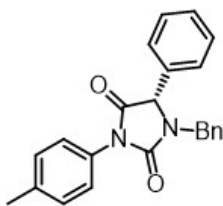

**1-benzyl-5-phenyl-3-(*p*-tolyl)imidazolidine-2,4-dione (7o)**

$^1\text{H}$  NMR (400 MHz,  $\text{CDCl}_3$ )  $\delta$  7.47 – 7.37 (m, 3H), 7.36 – 7.28 (m, 5H), 7.26 (dd,  $J$  = 11.5, 5.2 Hz, 4H), 7.21 – 7.13 (m, 2H), 5.21 (d,  $J$  = 14.9 Hz, 1H), 4.79 (s, 1H), 3.79 (d,  $J$  = 14.9 Hz, 1H), 2.35 (s, 3H).  $^{13}\text{C}$  NMR (101 MHz,  $\text{CDCl}_3$ )  $\delta$  170.1, 155.5, 138.0, 135.2, 132.5, 129.6, 129.3, 129.3, 129.0, 128.9, 128.5, 128.1, 127.6, 125.8, 62.7, 44.6, 21.1. HRMS (ESI-TOF)  $m/z$ :  $[\text{M}+\text{H}]^+$  Calcd for  $\text{C}_{23}\text{H}_{21}\text{N}_2\text{O}_2^+$ : 357.1598, found 357.1600.

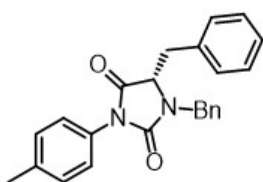

**1,5-dibenzyl-3-(*p*-tolyl)imidazolidine-2,4-dione (7p)**

$^1\text{H}$  NMR (400 MHz,  $\text{CDCl}_3$ )  $\delta$  7.41 – 7.24 (m, 6H), 7.24 – 7.08 (m, 6H), 6.94 (d,  $J$  = 8.0 Hz, 2H), 5.21 (d,  $J$  = 15.1 Hz, 1H), 4.15 (t,  $J$  = 4.4 Hz, 1H), 4.08 (d,  $J$  = 15.1 Hz, 1H), 3.29 – 3.12 (m, 2H), 2.33 (s, 3H).  $^{13}\text{C}$  NMR (101 MHz,  $\text{CDCl}_3$ )  $\delta$  171.2, 155.6, 138.2, 135.3, 134.2, 129.6, 129.0, 128.8, 128.6, 128.3, 128.2, 127.4, 126.0, 59.1, 45.0, 35.0, 21.1. HRMS (ESI-TOF)  $m/z$ :  $[\text{M}+\text{H}]^+$  Calcd for  $\text{C}_{24}\text{H}_{23}\text{N}_2\text{O}_2^+$ : 371.1754, found 371.1759.

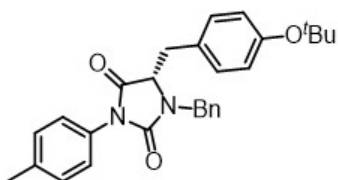

**1-benzyl-5-(4-(*tert*-butoxy)benzyl)-3-(*p*-tolyl)imidazolidine-2,4-dione (7q)**

$^1\text{H}$  NMR (400 MHz,  $\text{CDCl}_3$ )  $\delta$  7.34 (s, 3H), 7.29 – 7.12 (m, 4H), 7.12 – 7.00 (m, 2H), 7.00 – 6.71 (m, 4H), 5.23 (d,  $J$  = 15.0 Hz, 1H), 4.11 (dd,  $J$  = 14.0, 9.7 Hz, 2H), 3.31 – 2.91 (m, 2H), 2.33 (s, 3H), 1.34 (d,  $J$  = 3.2 Hz, 9H).  $^{13}\text{C}$  NMR (101 MHz,  $\text{CDCl}_3$ )  $\delta$  171.3, 155.6, 154.7, 138.2, 135.4, 130.1, 129.6, 129.0, 128.9, 128.8, 128.4, 128.2, 126.0, 124.2, 78.5, 59.2, 45.1, 34.3, 28.8, 21.1. HRMS (ESI-TOF)  $m/z$ :  $[\text{M}+\text{H}]^+$  Calcd for  $\text{C}_{28}\text{H}_{31}\text{N}_2\text{O}_3^+$ : 443.2329, found 443.2336.

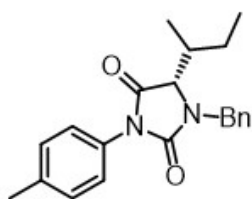

**1-benzyl-5-(*sec*-butyl)-3-(*p*-tolyl)imidazolidine-2,4-dione (7r)**

$^1\text{H}$  NMR (400 MHz,  $\text{CDCl}_3$ )  $\delta$  7.68 – 7.00 (m, 9H), 5.16 (d,  $J = 15.2$  Hz, 1H), 4.10 (d,  $J = 15.2$  Hz, 1H), 3.86 (d,  $J = 3.0$  Hz, 1H), 2.36 (s, 3H), 2.12 – 1.92 (m, 1H), 1.79 – 1.45 (m, 2H), 0.91 (dd,  $J = 15.8, 7.2$  Hz, 6H).  $^{13}\text{C}$  NMR (101 MHz,  $\text{CDCl}_3$ )  $\delta$  170.9, 156.0, 138.0, 135.5, 129.5, 129.0, 128.9, 128.2, 128.1, 125.9, 61.4, 44.5, 35.1, 24.8, 21.1, 13.3, 12.0. HRMS (ESI-TOF)  $m/z$ :  $[\text{M}+\text{H}]^+$  Calcd for  $\text{C}_{21}\text{H}_{25}\text{N}_2\text{O}_2^+$ : 337.1911, found 337.1918.

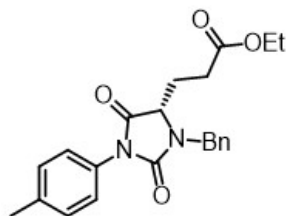

**ethyl-3-(3-benzyl-2,5-dioxo-1-(*p*-tolyl)imidazolidin-4-yl)propanoate (7s)**

$^1\text{H}$  NMR (400 MHz,  $\text{CDCl}_3$ )  $\delta$  7.45 – 7.17 (m, 9H), 5.07 (d,  $J = 15.2$  Hz, 1H), 4.14 (dt,  $J = 14.3, 10.0$  Hz, 3H), 3.99 (dd,  $J = 6.1, 3.0$  Hz, 1H), 2.50 – 2.25 (m, 6H), 2.25 – 2.05 (m, 1H), 1.24 (t,  $J = 7.2$  Hz, 3H).  $^{13}\text{C}$  NMR (101 MHz,  $\text{CDCl}_3$ )  $\delta$  172.2, 171.3, 155.6, 138.2, 135.4, 129.6, 129.0, 128.9, 128.4, 128.2, 125.9, 60.8, 57.3, 44.7, 28.0, 23.6, 21.1, 14.1. HRMS (ESI-TOF)  $m/z$ :  $[\text{M}+\text{H}]^+$  Calcd for  $\text{C}_{22}\text{H}_{25}\text{N}_2\text{O}_4^+$ : 381.1809, found 381.1821.

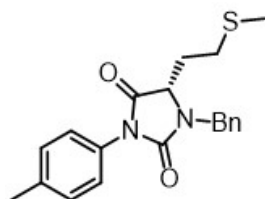

**1-benzyl-5-(2-(methylthio)ethyl)-3-(*p*-tolyl)imidazolidine-2,4-dione (7t)**

$^1\text{H}$  NMR (400 MHz,  $\text{CDCl}_3$ )  $\delta$  7.53 – 6.95 (m, 9H), 5.03 (d,  $J = 15.2$  Hz, 1H), 4.22 (d,  $J = 15.2$  Hz, 1H), 4.03 (dd,  $J = 6.2, 3.1$  Hz, 1H), 2.59 – 2.42 (m, 2H), 2.37 (s, 3H), 2.34 – 2.17 (m, 1H), 2.08 (ddd,  $J = 14.5, 7.3, 4.6$  Hz, 1H), 2.02 (s, 3H).  $^{13}\text{C}$  NMR (101 MHz,  $\text{CDCl}_3$ )  $\delta$  171.4, 155.8, 138.1, 135.4, 129.6, 129.0, 128.3, 128.2, 125.8, 57.5, 45.2, 28.0, 27.7, 21.1, 15.2. HRMS (ESI-TOF)  $m/z$ :  $[\text{M}+\text{H}]^+$  Calcd for  $\text{C}_{20}\text{H}_{23}\text{N}_2\text{O}_2\text{S}^+$ : 355.1475, found 355.1483.

**8. References**

- [1] (a) H. Wang, H. Jung, F. Song, S. Zhu, Z. Bai, D. Chen, G. He, S. Chang, G. Chen, *Nat. Chem.*, 2021, **13**, 378-385; (b) S. Lin, B. Lin, Z. Zhang, J. Chen, Y. Luo, Y. Xia, *Org. Lett.*, 2022, **24**, 3302-3306.

## 9. NMR Spectra of Products

$^1\text{H}$  NMR (400 MHz,  $\text{CDCl}_3$ ) of compound **3a**

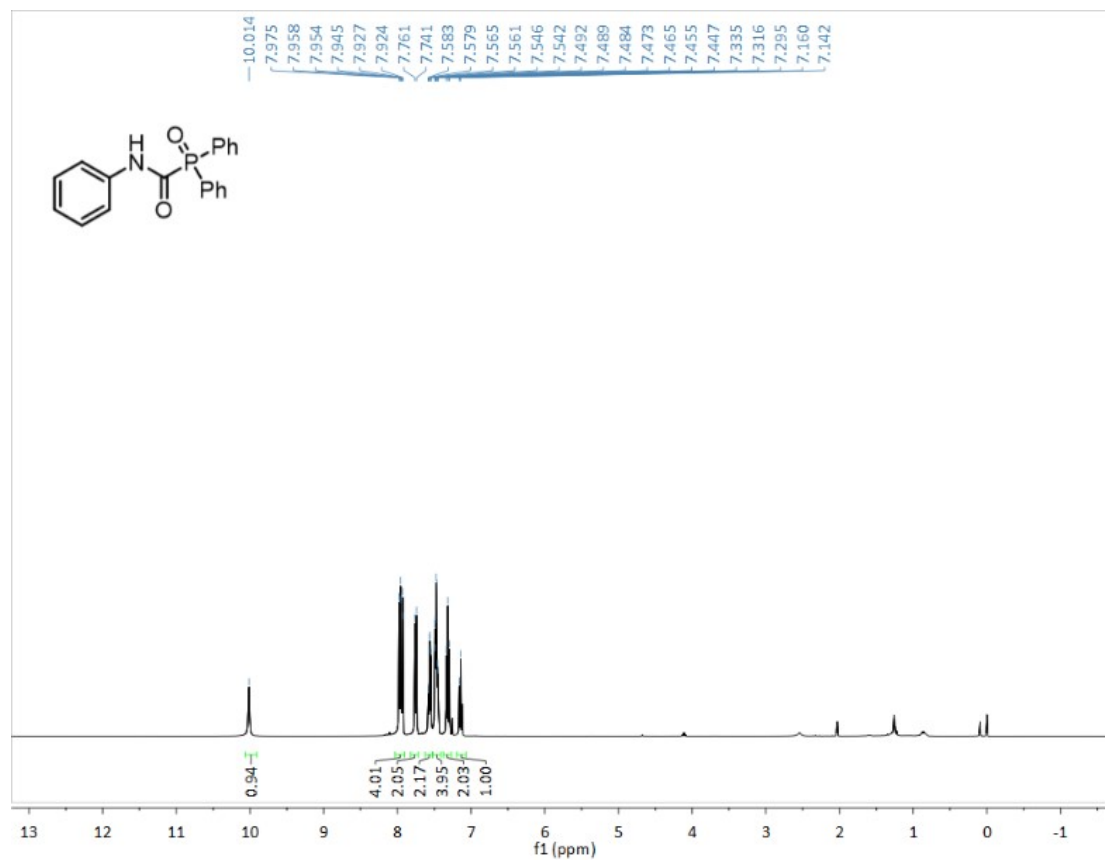

$^{13}\text{C}$  NMR (101 MHz,  $\text{CDCl}_3$ ) of compound **3a**

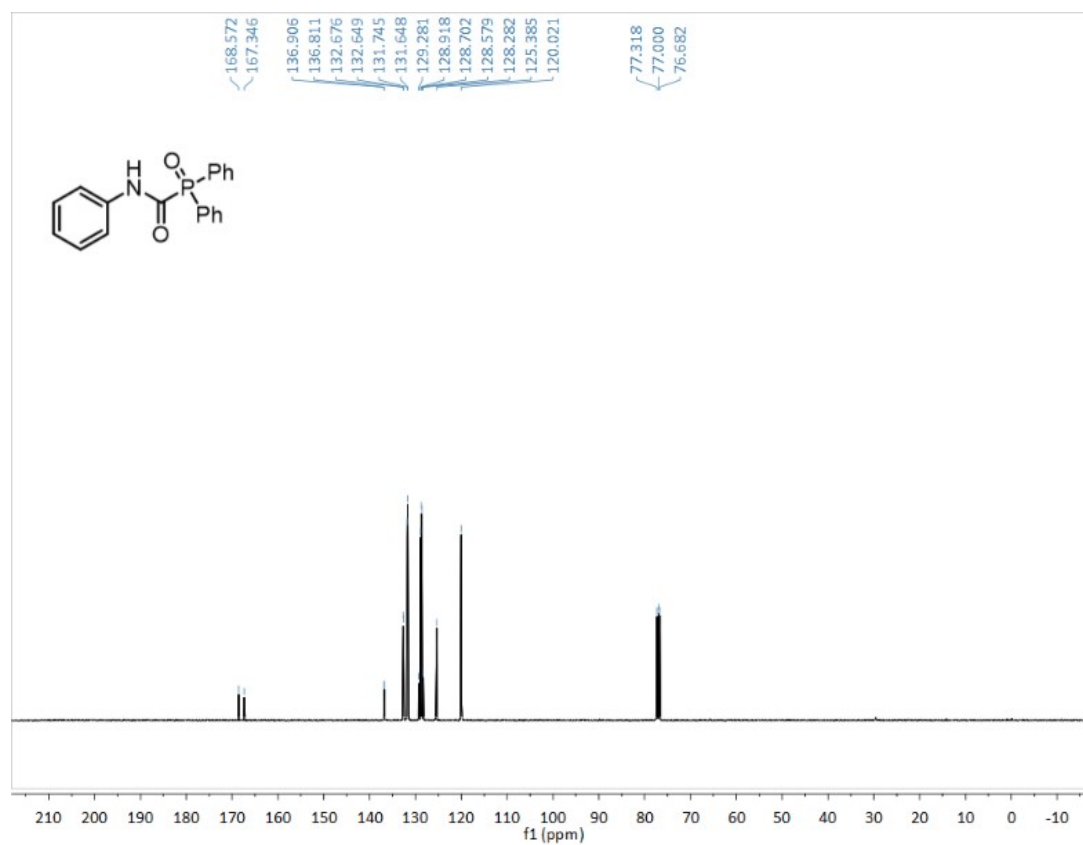

$^{31}\text{P}$  NMR (162 MHz,  $\text{CDCl}_3$ ) of compound **3a**

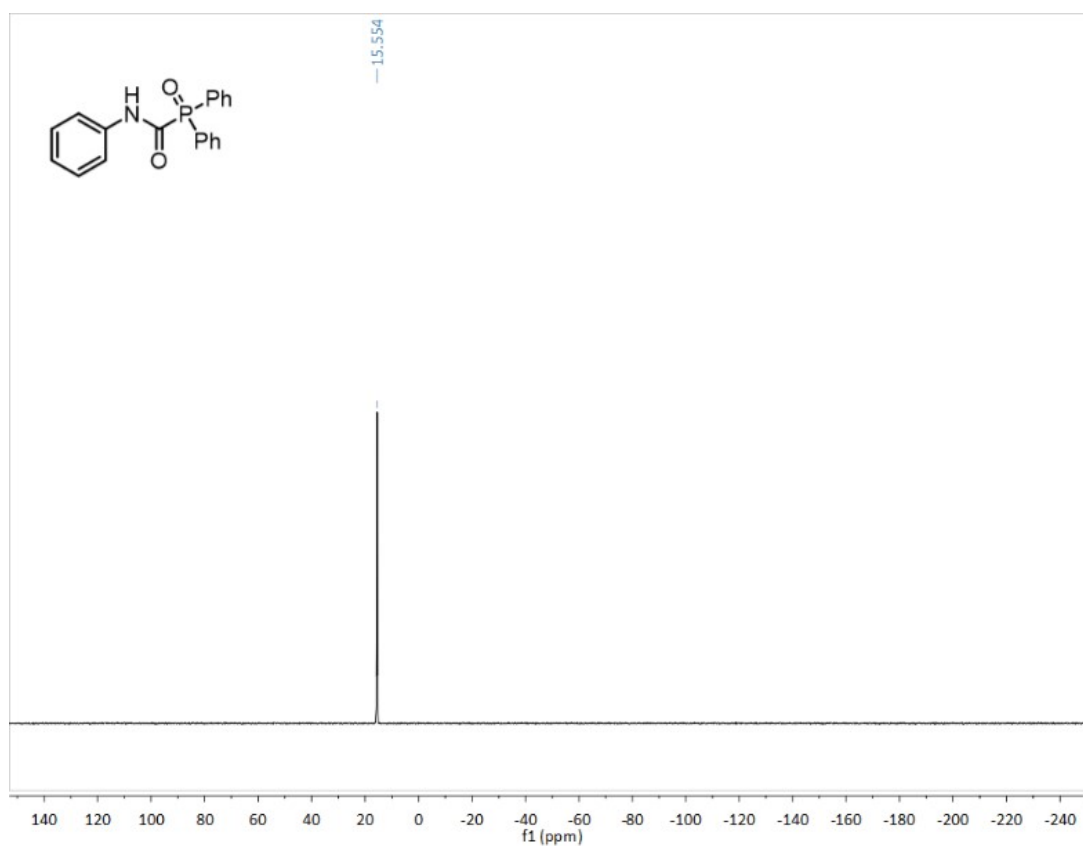

$^1\text{H}$  NMR (400 MHz,  $\text{CDCl}_3$ ) of compound **3b**

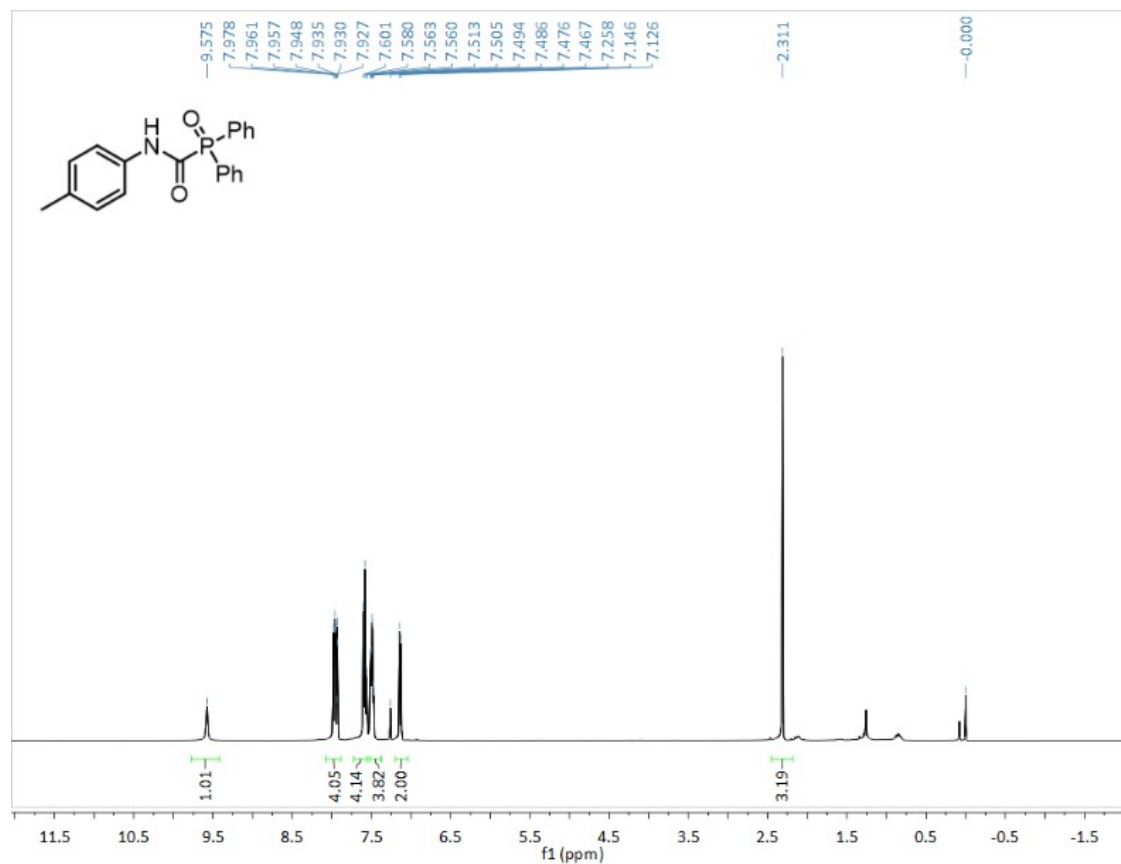

$^{13}\text{C}$  NMR (101 MHz,  $\text{CDCl}_3$ ) of compound **3b**

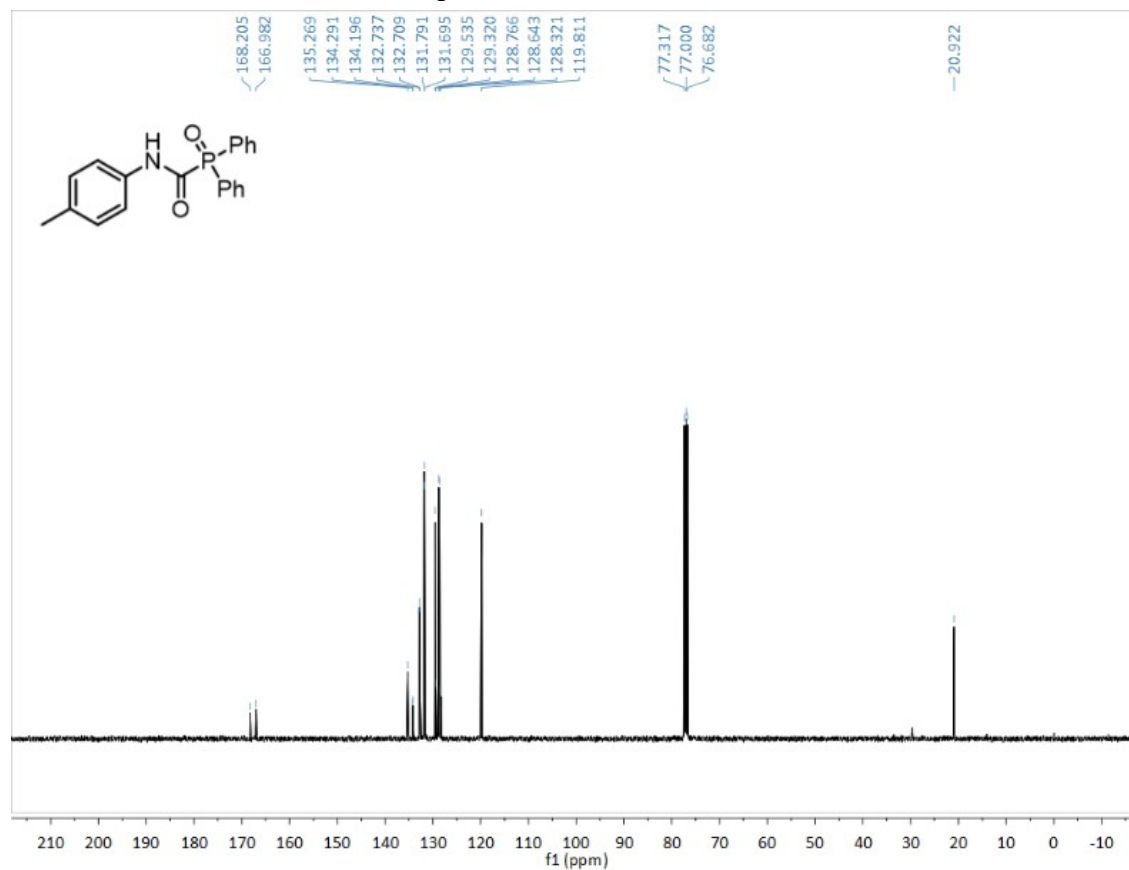

$^{31}\text{P}$  NMR (162 MHz,  $\text{CDCl}_3$ ) of compound **3b**

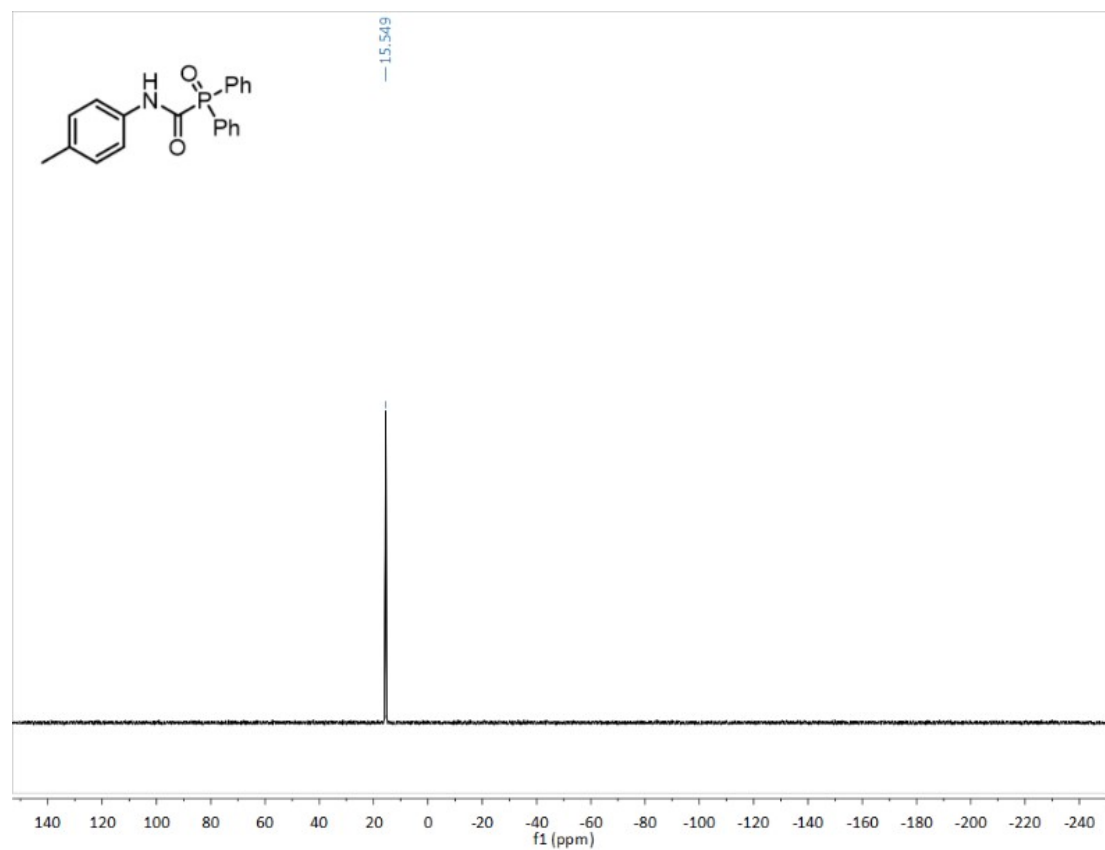

<sup>1</sup>H NMR (400 MHz, CDCl<sub>3</sub>) of compound **3c**

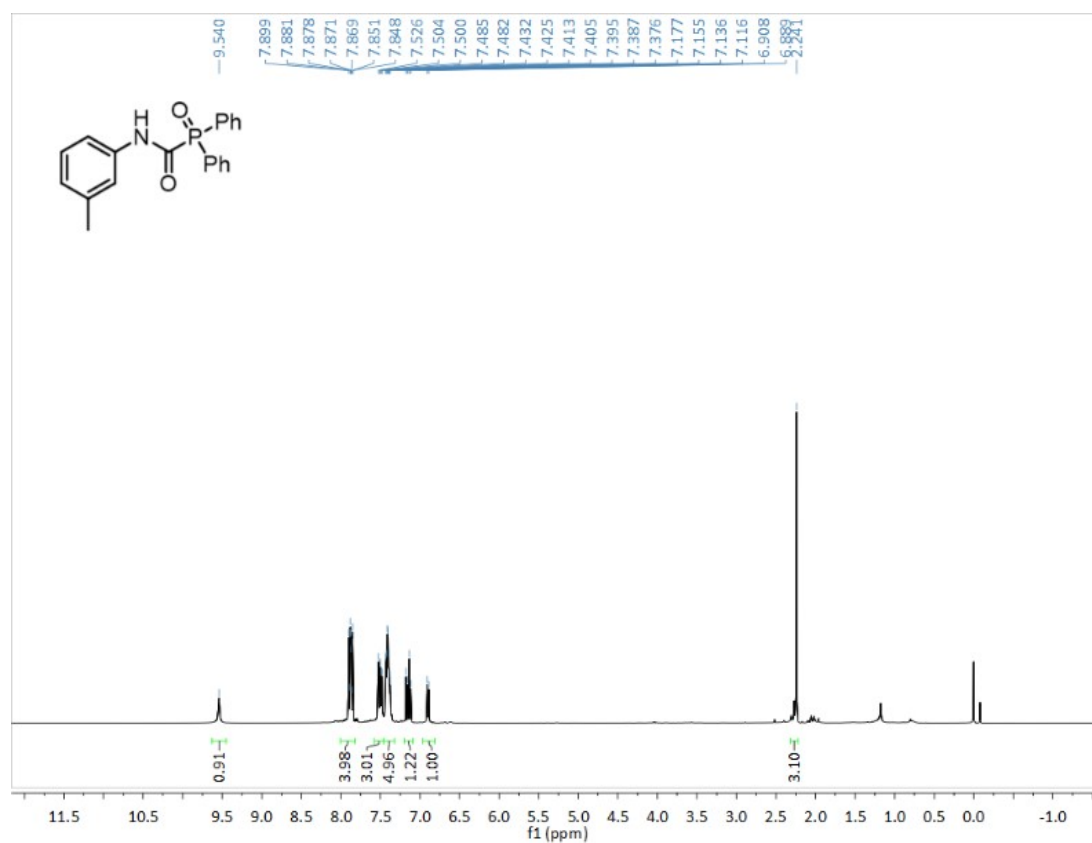

<sup>13</sup>C NMR (101 MHz, CDCl<sub>3</sub>) of compound **3c**

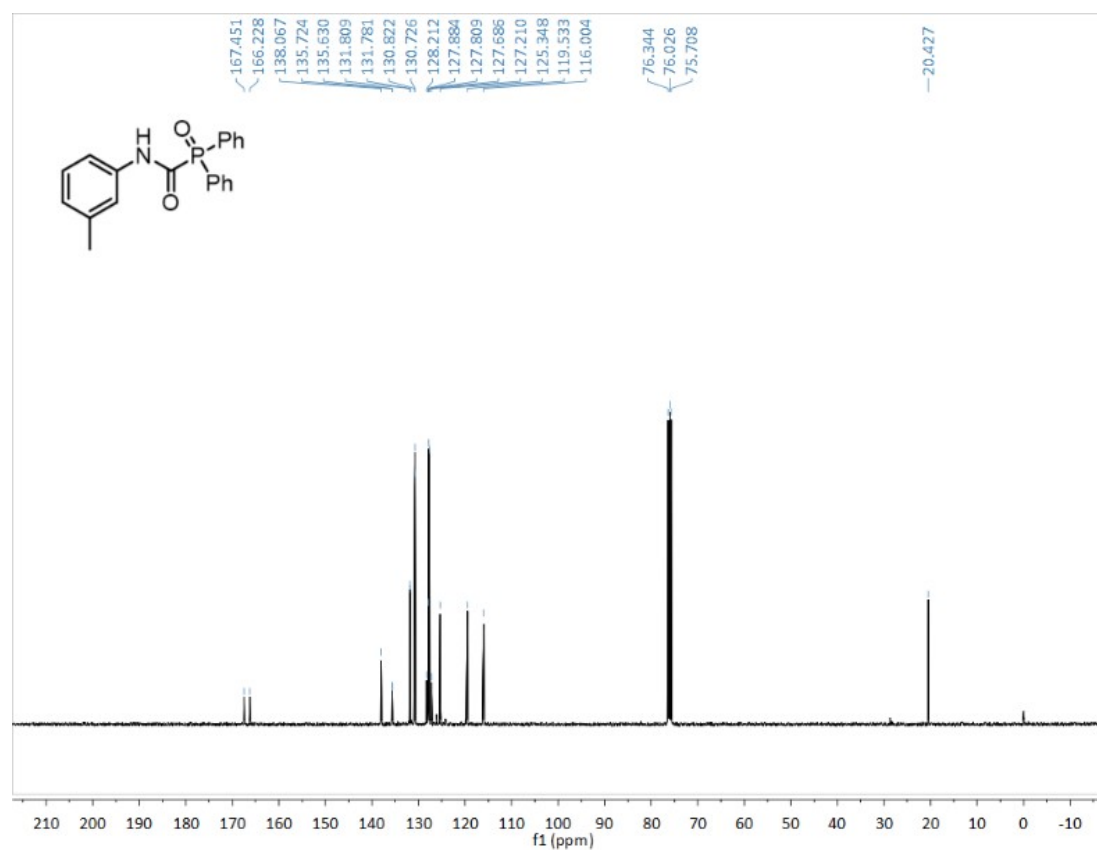



$^{31}\text{P}$  NMR (162 MHz,  $\text{CDCl}_3$ ) of compound **3c**

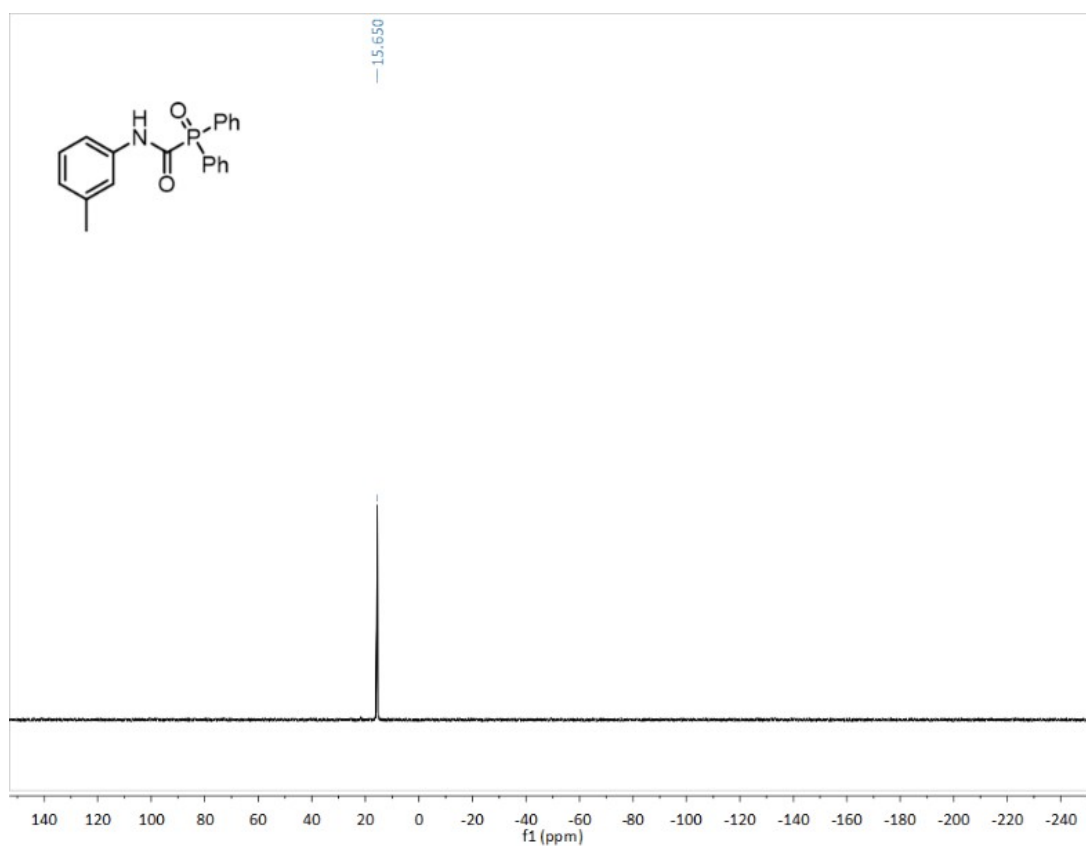

$^1\text{H}$  NMR (400 MHz,  $\text{CDCl}_3$ ) of compound **3d**

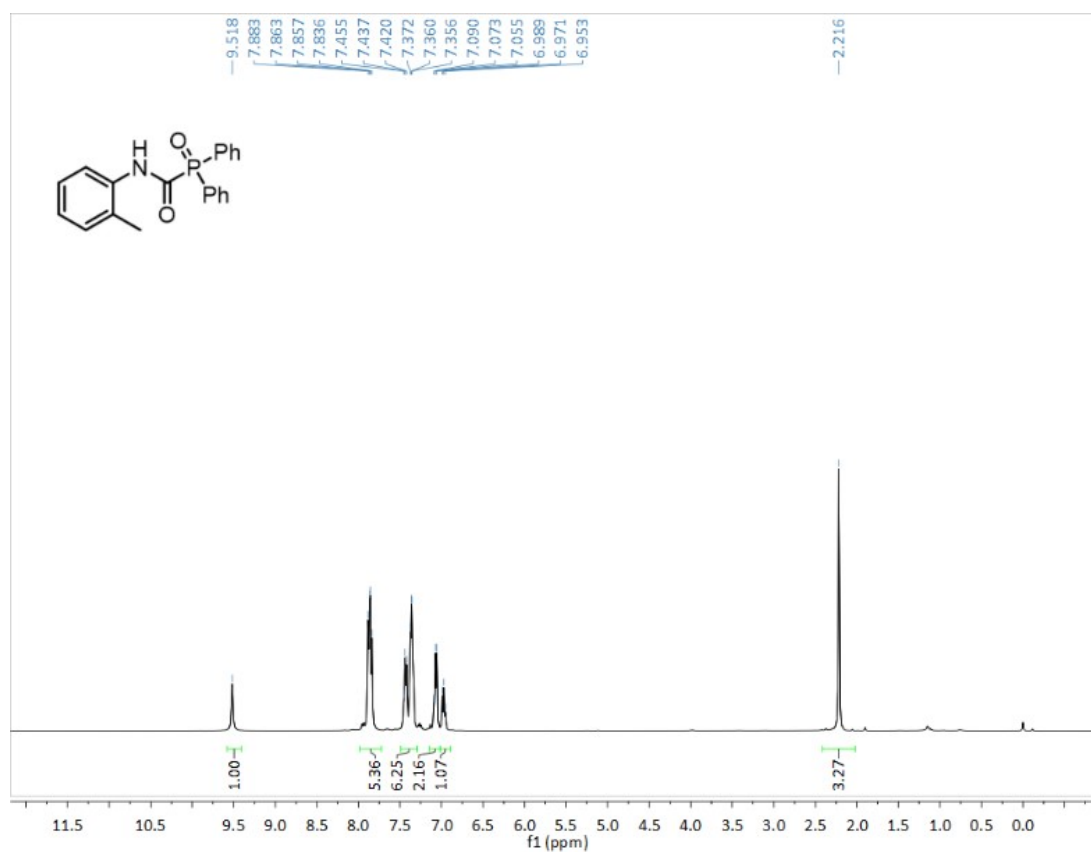

$^{13}\text{C}$  NMR (101 MHz,  $\text{CDCl}_3$ ) of compound **3d**

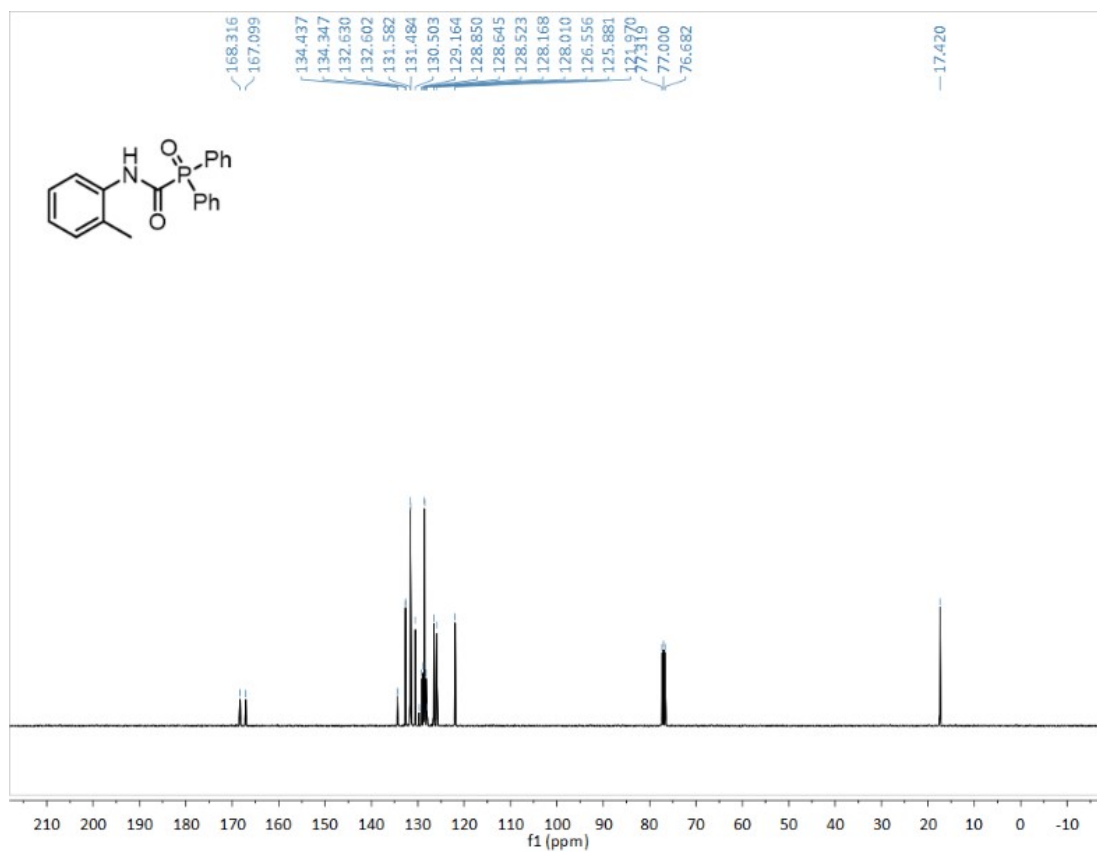

$^{31}\text{P}$  NMR (162 MHz,  $\text{CDCl}_3$ ) of compound **3d**

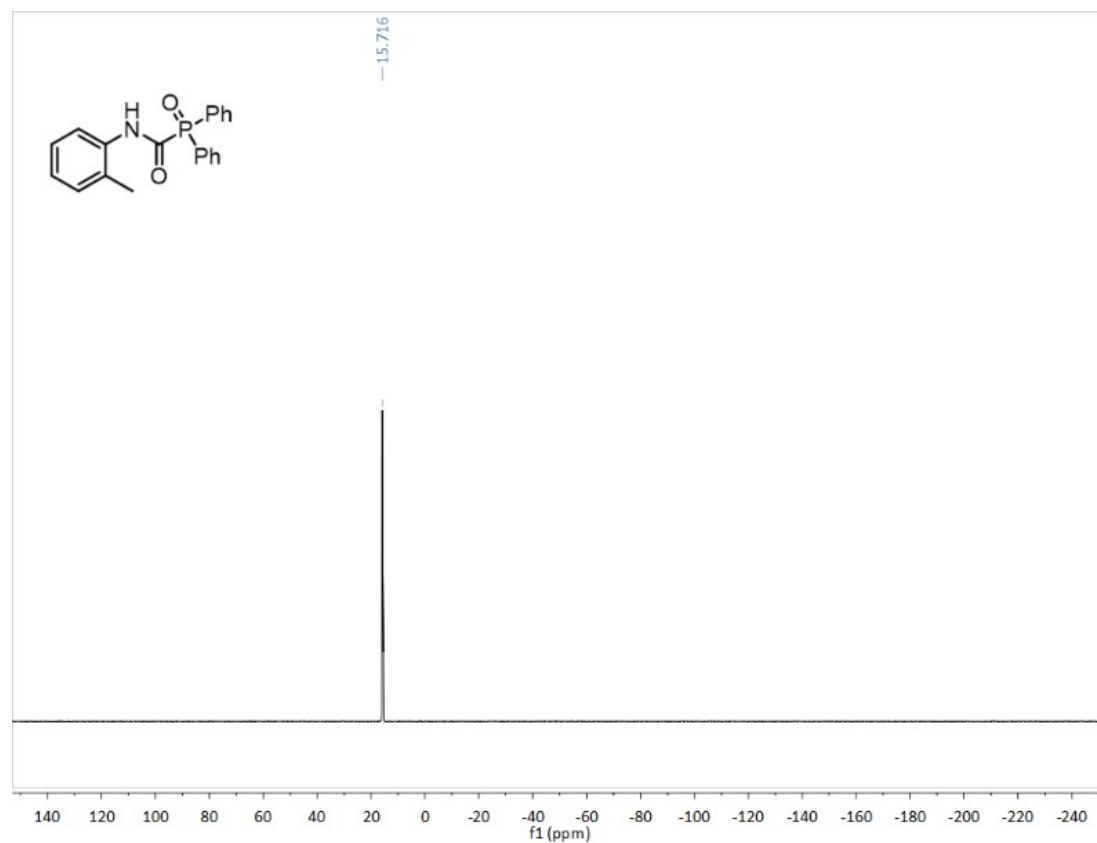

$^1\text{H}$  NMR (400 MHz,  $\text{CDCl}_3$ ) of compound **3e**

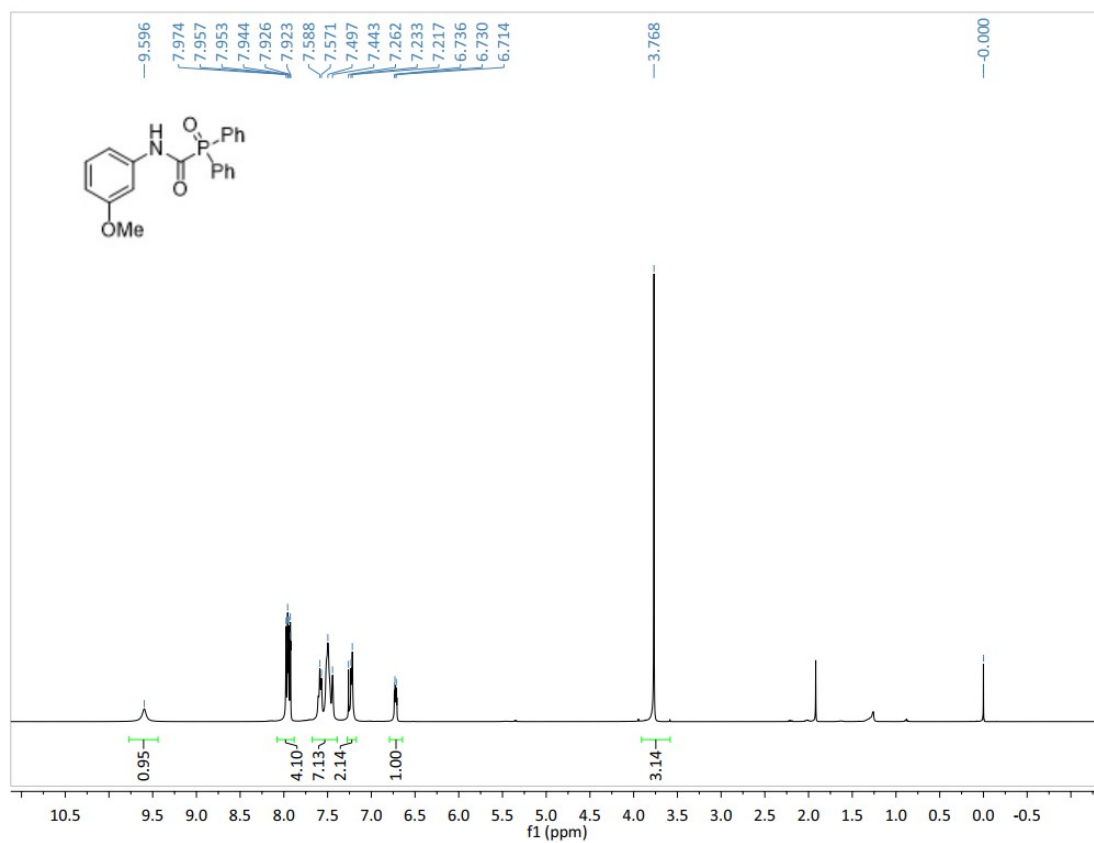

$^{13}\text{C}$  NMR (101 MHz,  $\text{CDCl}_3$ ) of compound **3e**

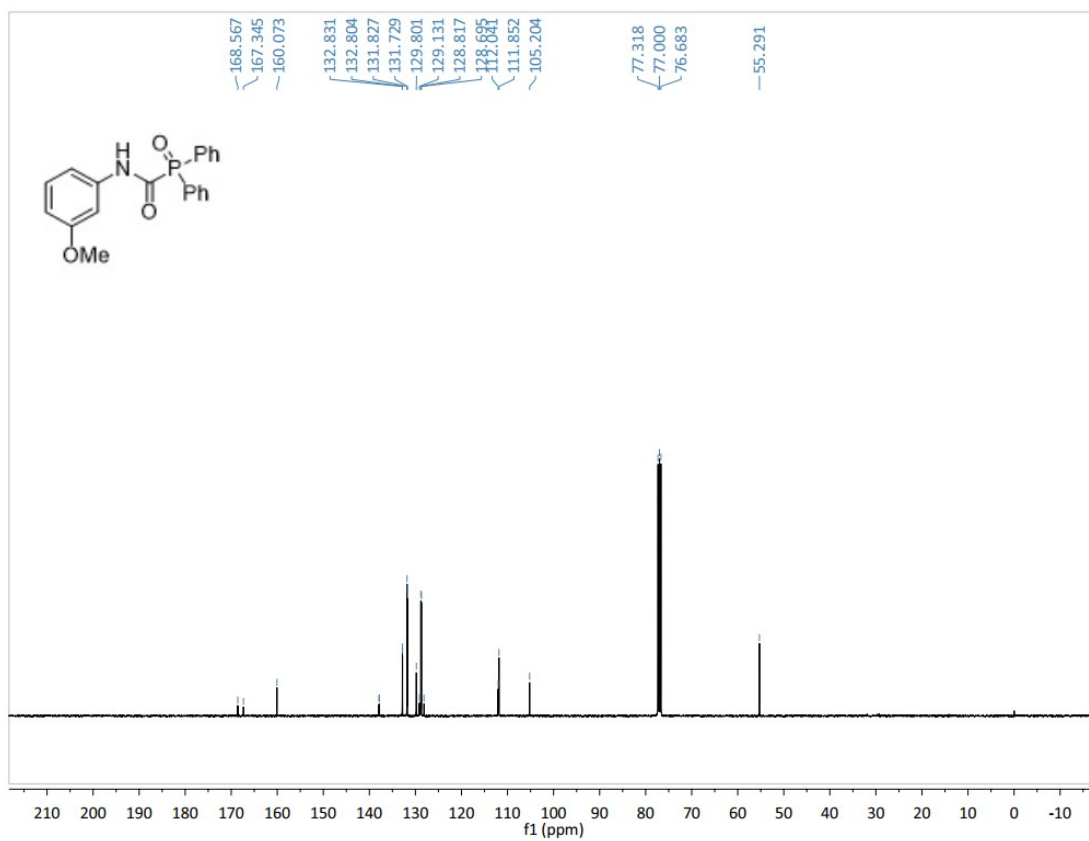

$^{31}\text{P}$  NMR (162 MHz,  $\text{CDCl}_3$ ) of compound **3e**

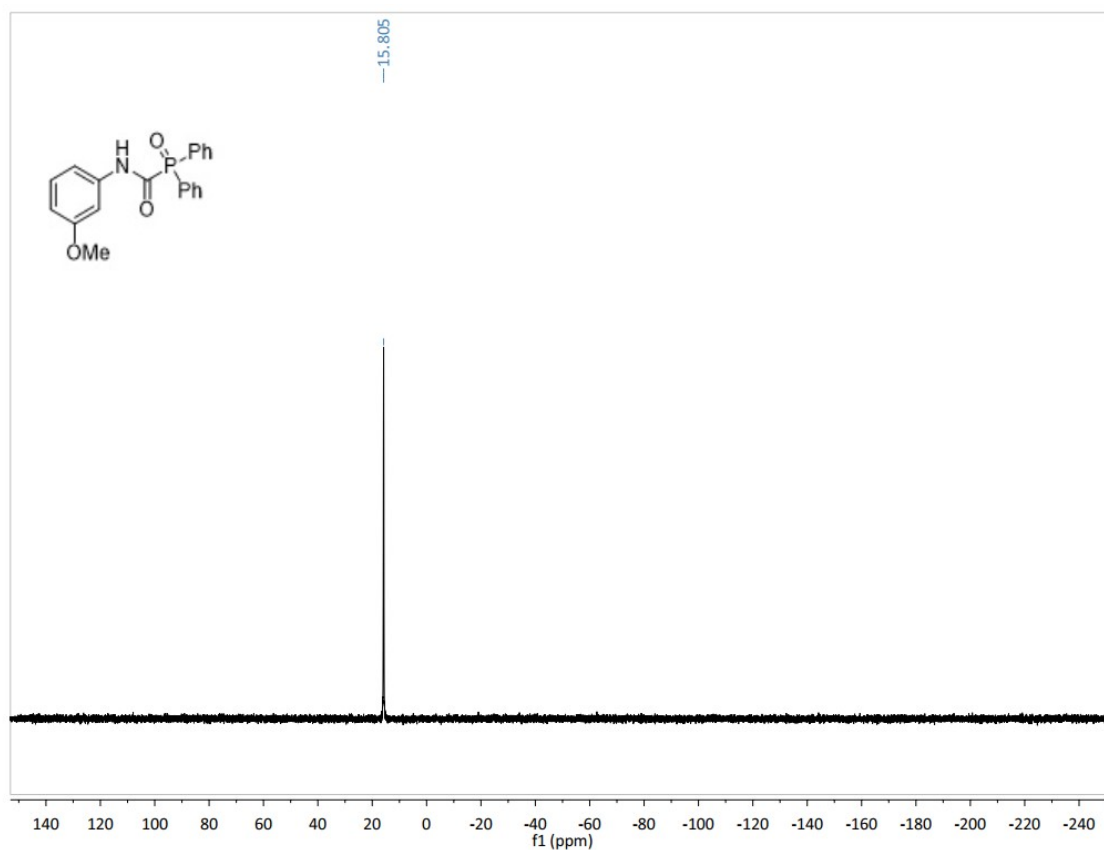

$^1\text{H}$  NMR (400 MHz, DMSO) of compound **3f**

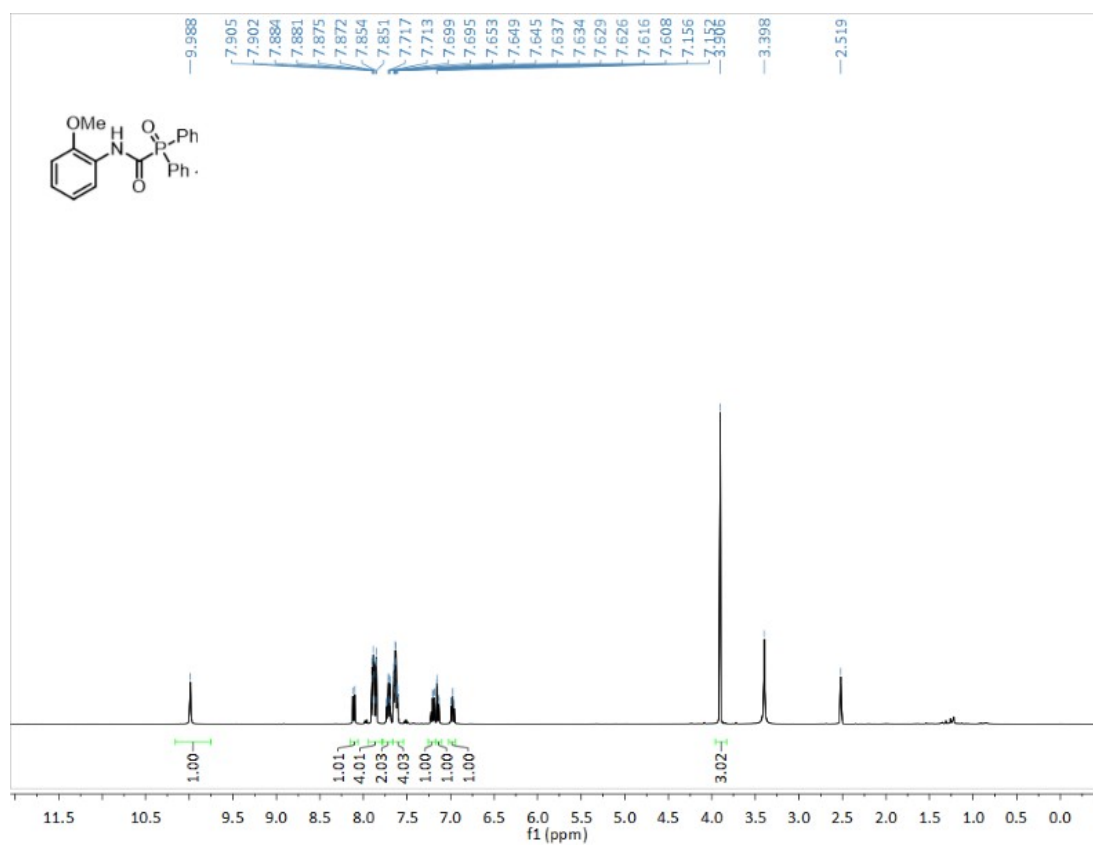

<sup>13</sup>C NMR (101 MHz, DMSO) of compound **3f**

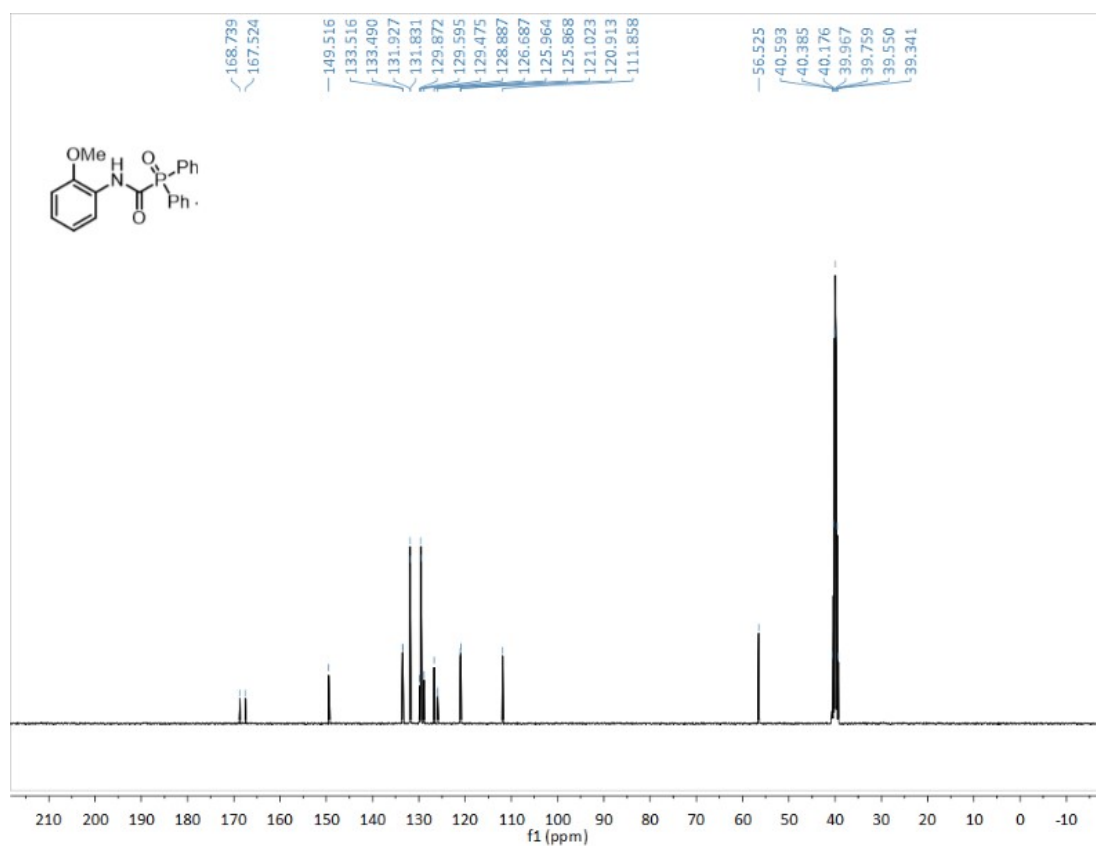

<sup>31</sup>P NMR (162 MHz, DMSO) of compound **3f**

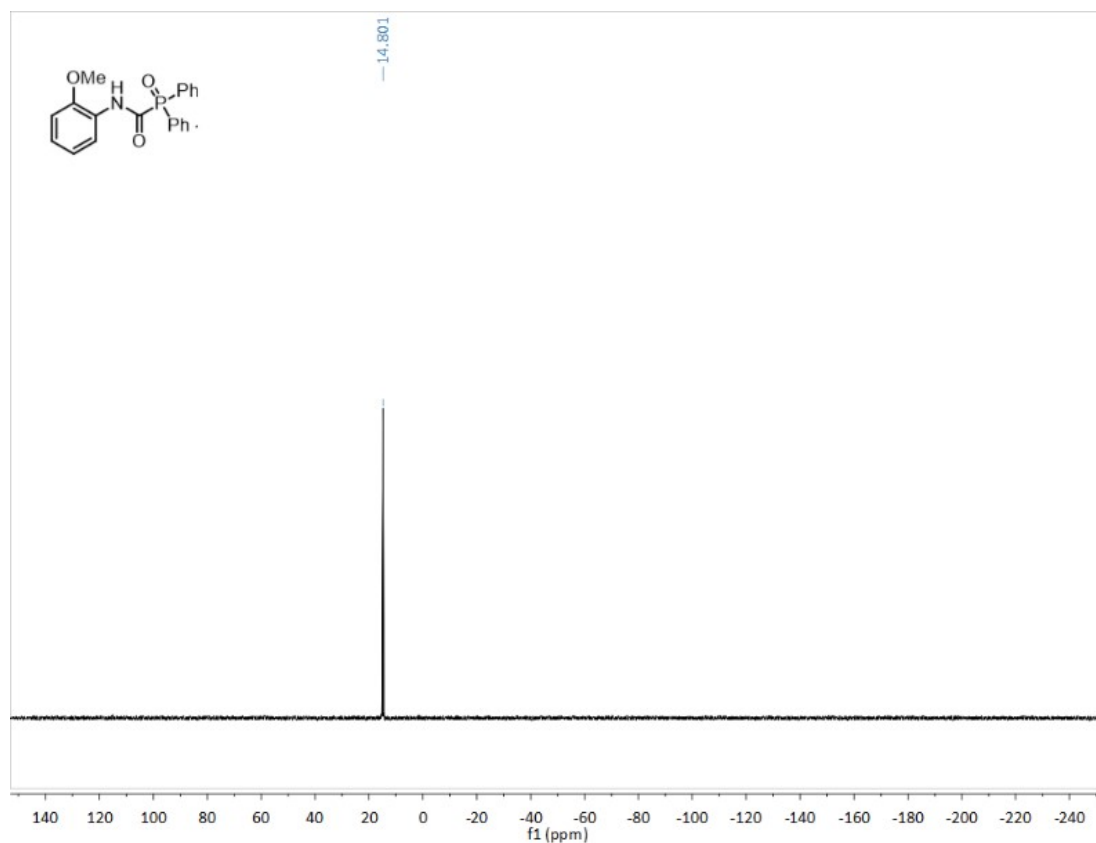

<sup>1</sup>H NMR (400 MHz, CDCl<sub>3</sub>) of compound **3g**

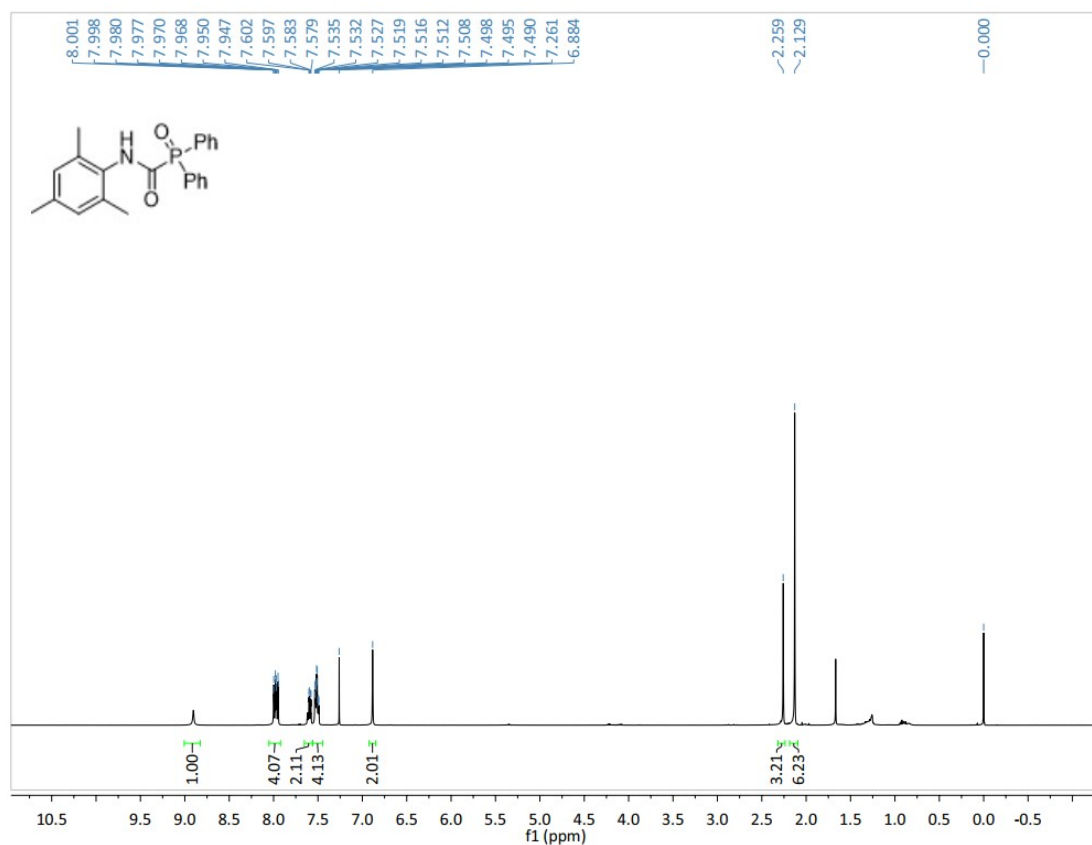

<sup>13</sup>C NMR (101 MHz, CDCl<sub>3</sub>) of compound **3g**

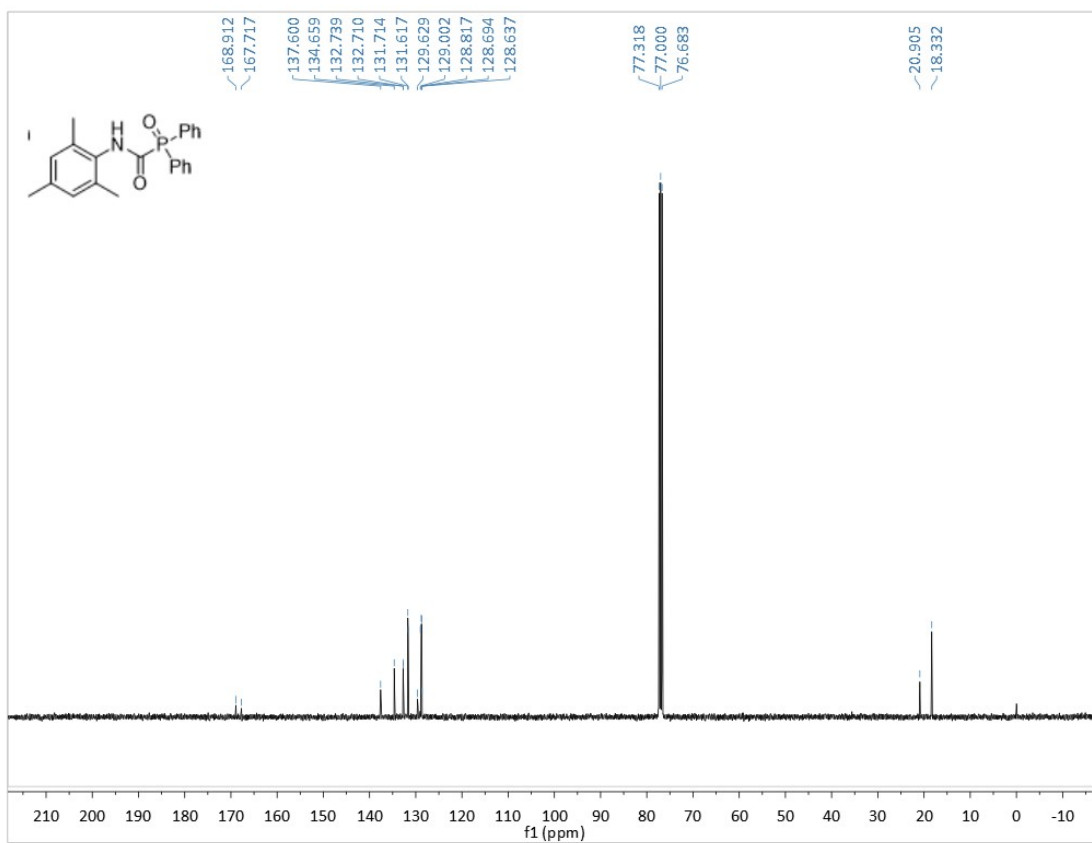

$^{31}\text{P}$  NMR (162 MHz,  $\text{CDCl}_3$ ) of compound **3g**

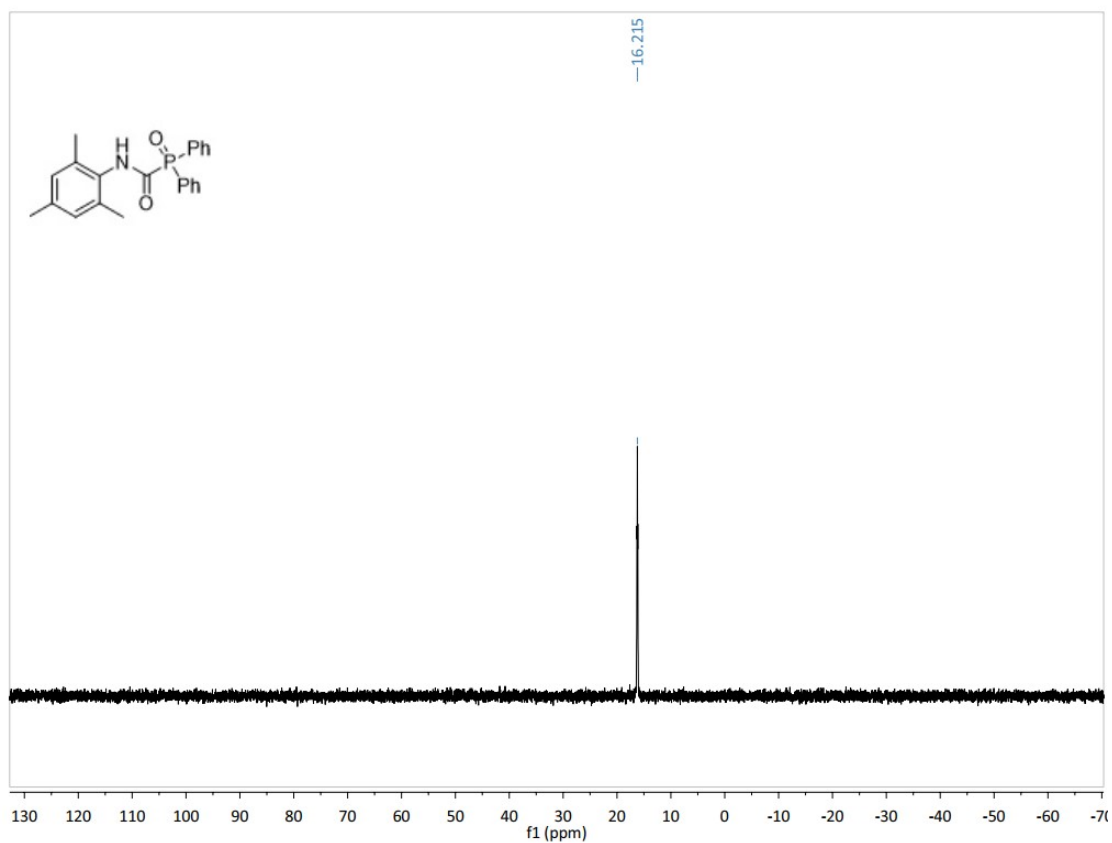

$^1\text{H}$  NMR (400 MHz,  $\text{CDCl}_3$ ) of compound **3h**

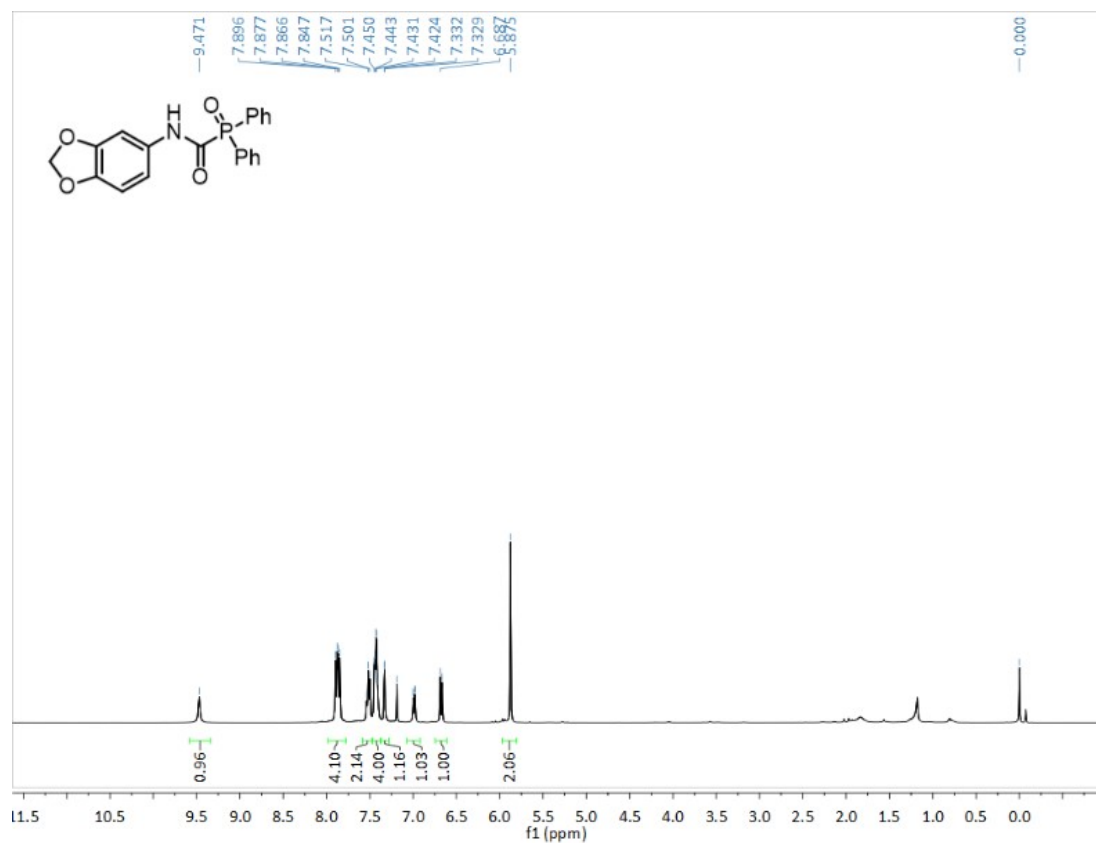

$^{13}\text{C}$  NMR (101 MHz,  $\text{CDCl}_3$ ) of compound **3h**

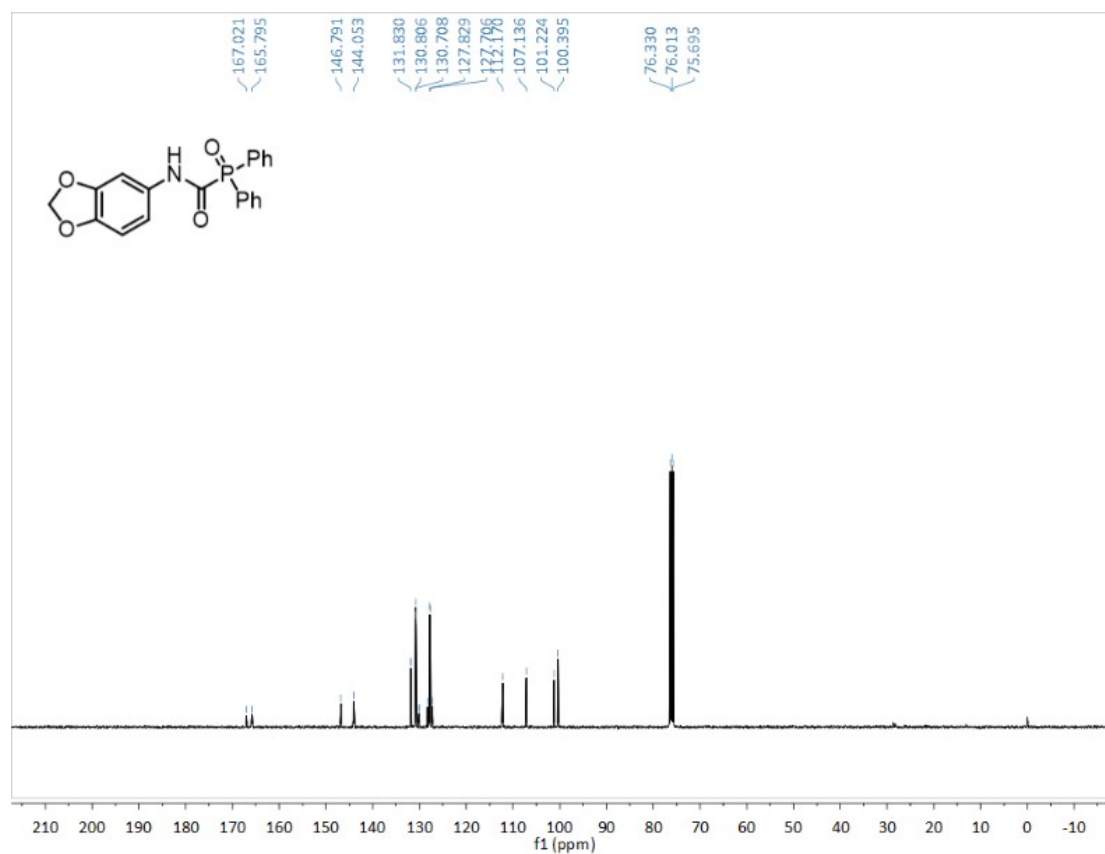

$^{31}\text{P}$  NMR (162 MHz,  $\text{CDCl}_3$ ) of compound **3h**

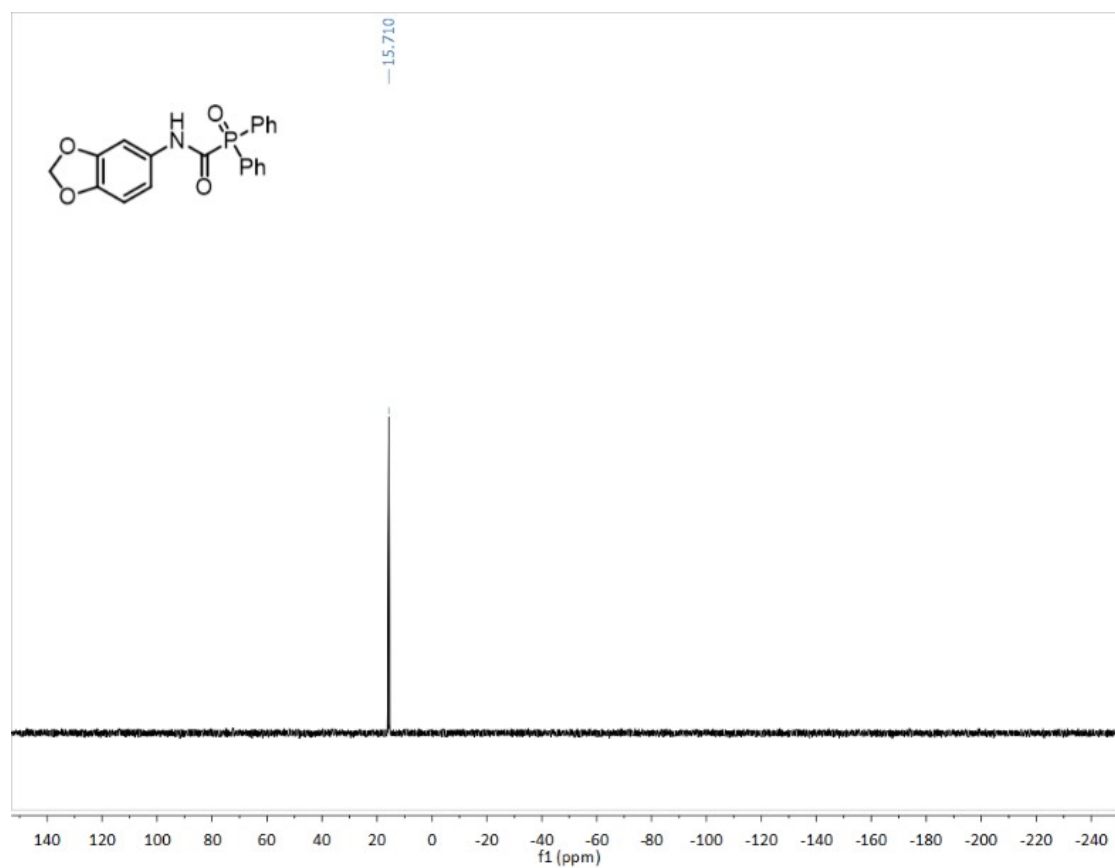



<sup>1</sup>H NMR (400 MHz, CDCl<sub>3</sub>) of compound **3i**

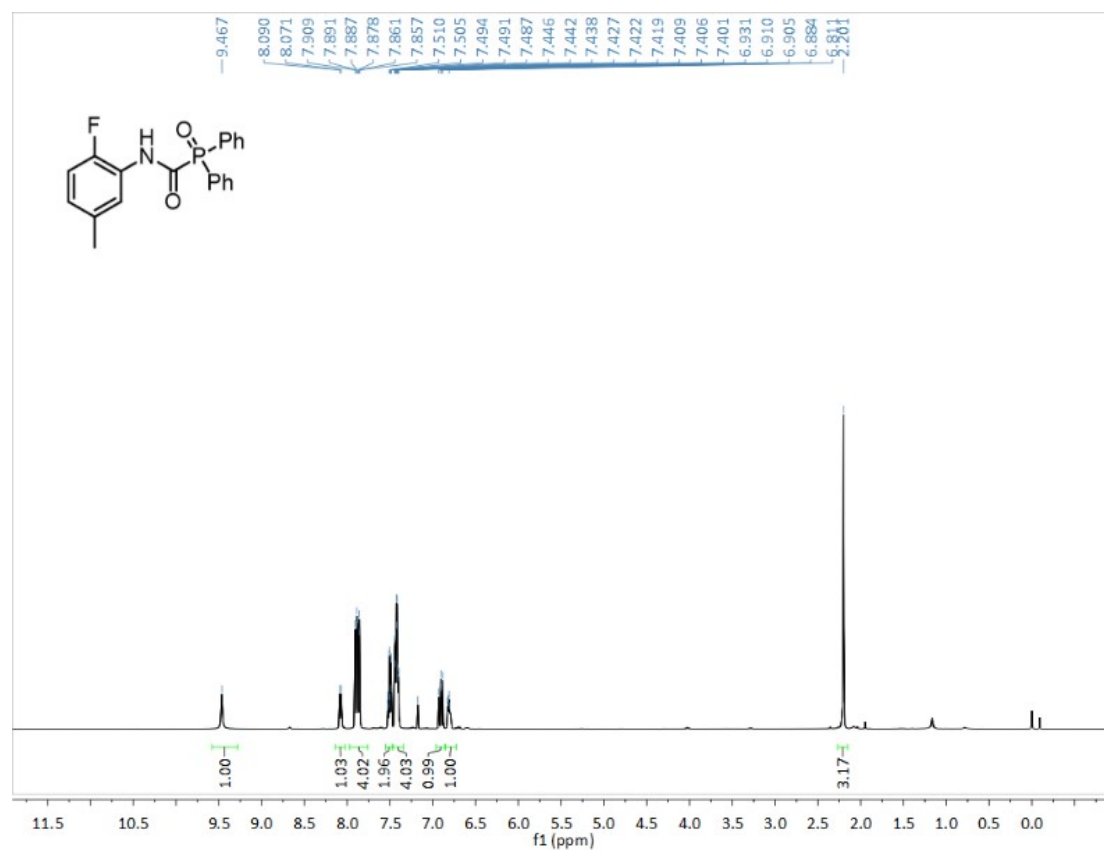

<sup>13</sup>C NMR (101 MHz, CDCl<sub>3</sub>) of compound **3i**

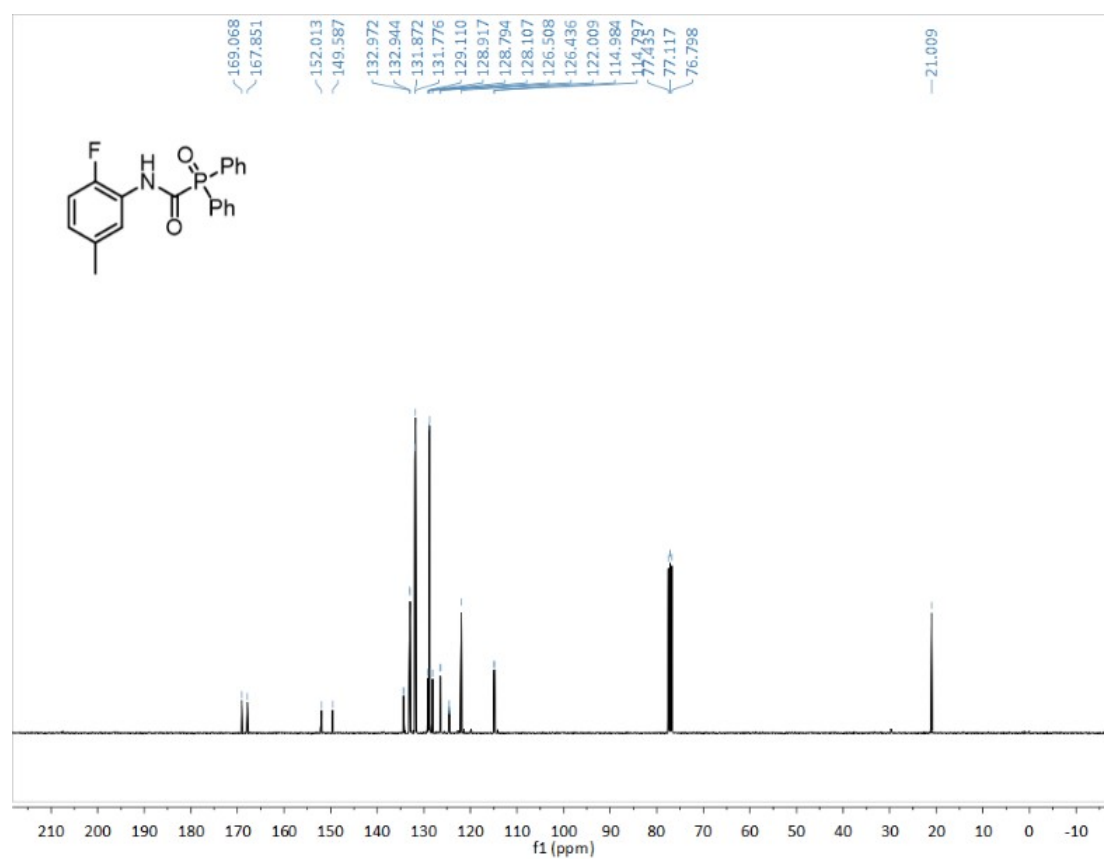

$^{31}\text{P}$  NMR (162 MHz,  $\text{CDCl}_3$ ) of compound **3i**

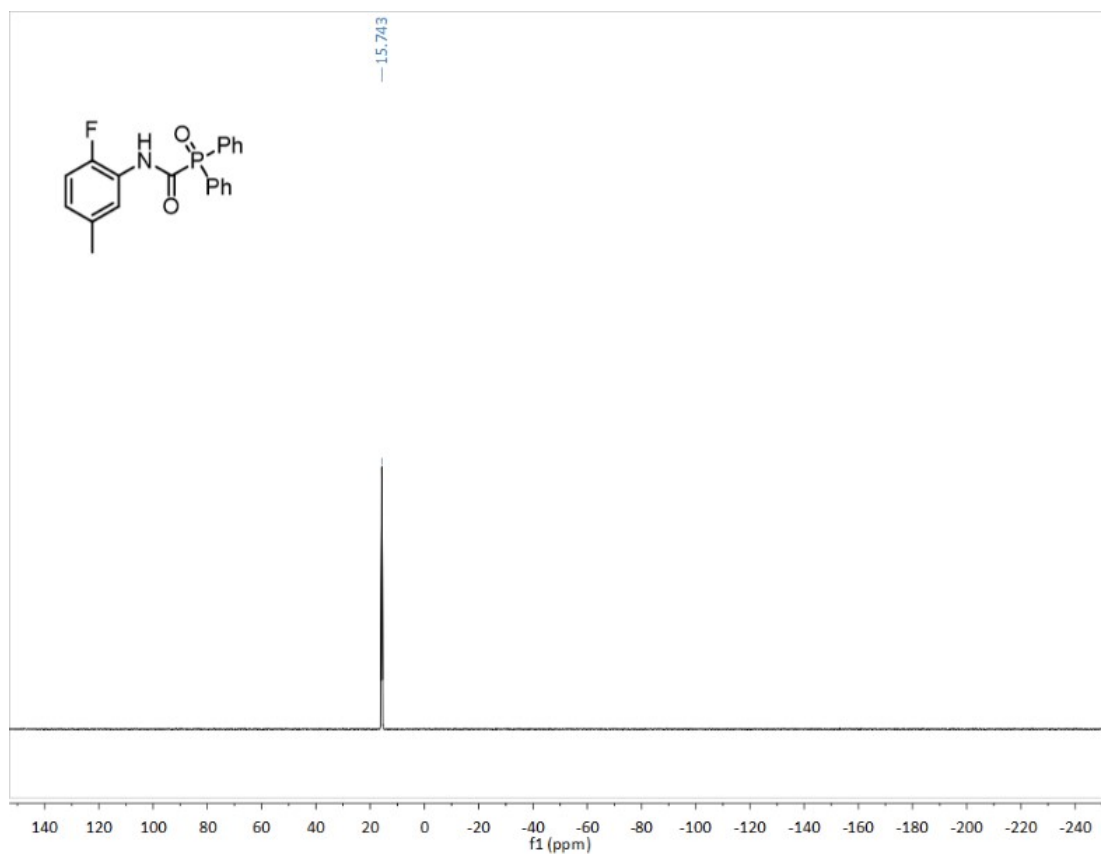

$^1\text{H}$  NMR (400 MHz,  $\text{CDCl}_3$ ) of compound **3j**

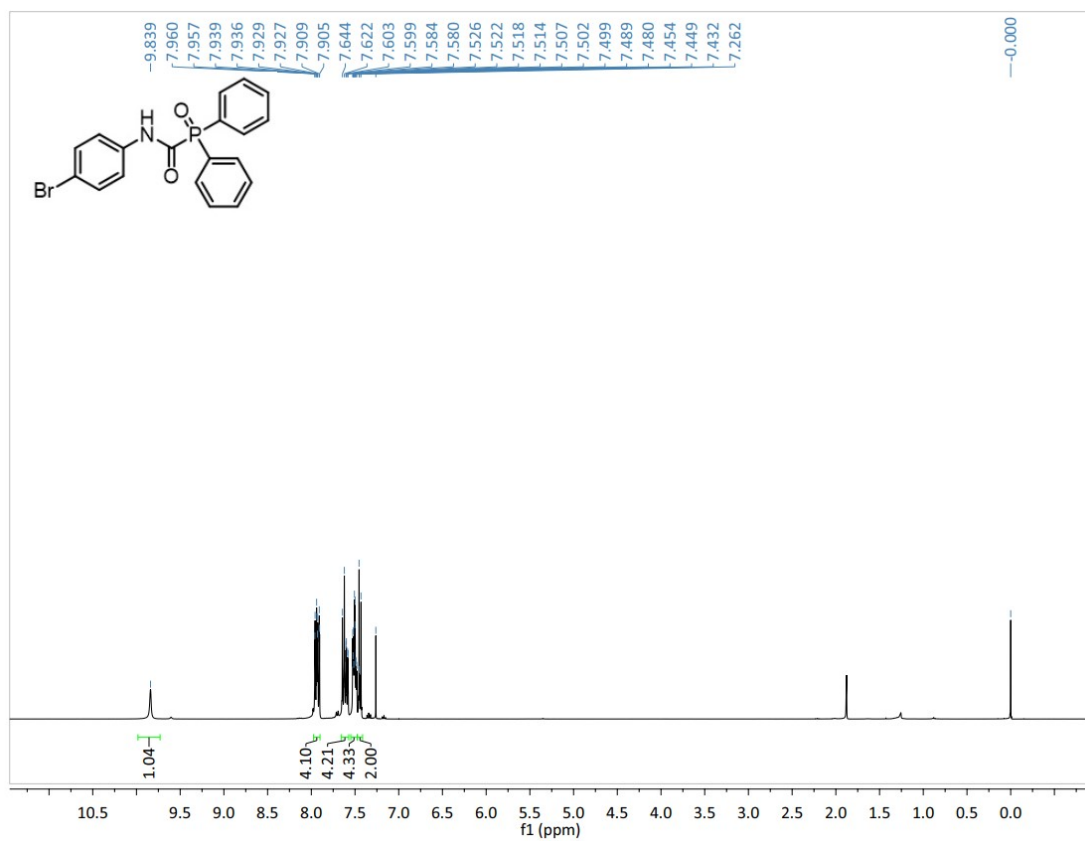

$^{13}\text{C}$  NMR (101 MHz,  $\text{CDCl}_3$ ) of compound **3j**

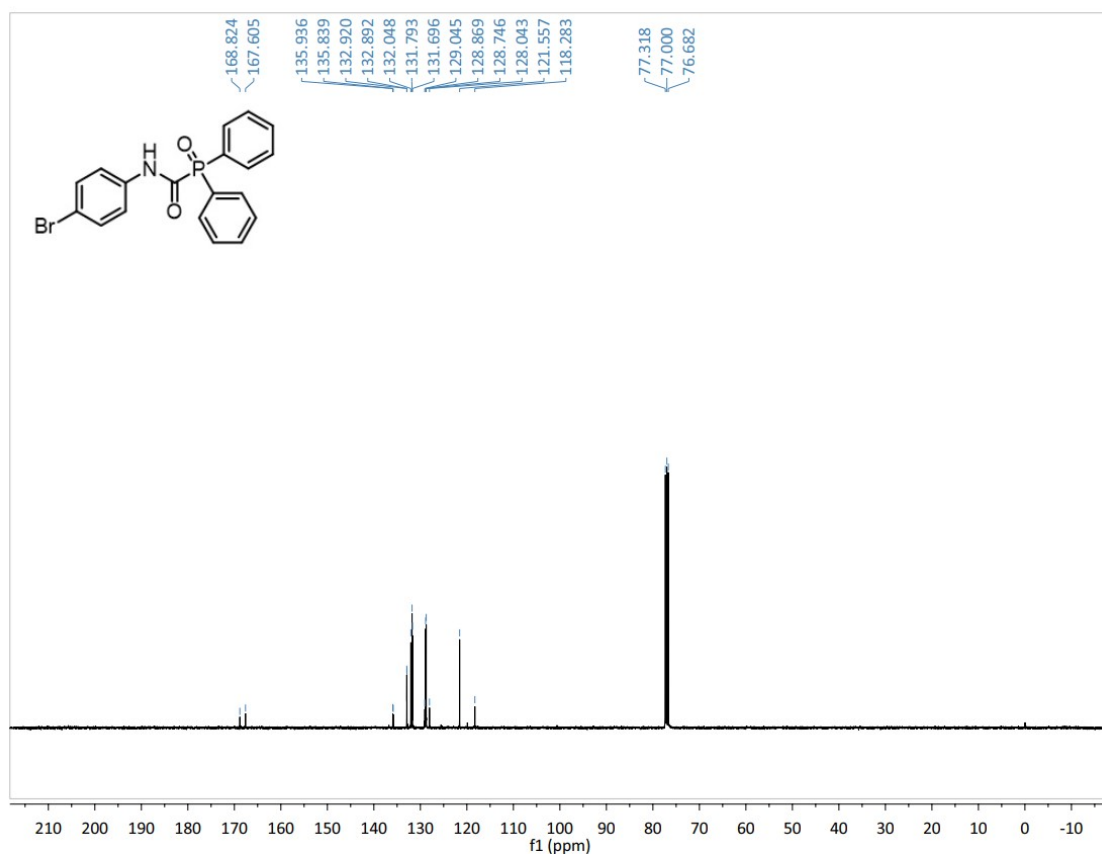

$^{31}\text{P}$  NMR (162 MHz,  $\text{CDCl}_3$ ) of compound **3j**

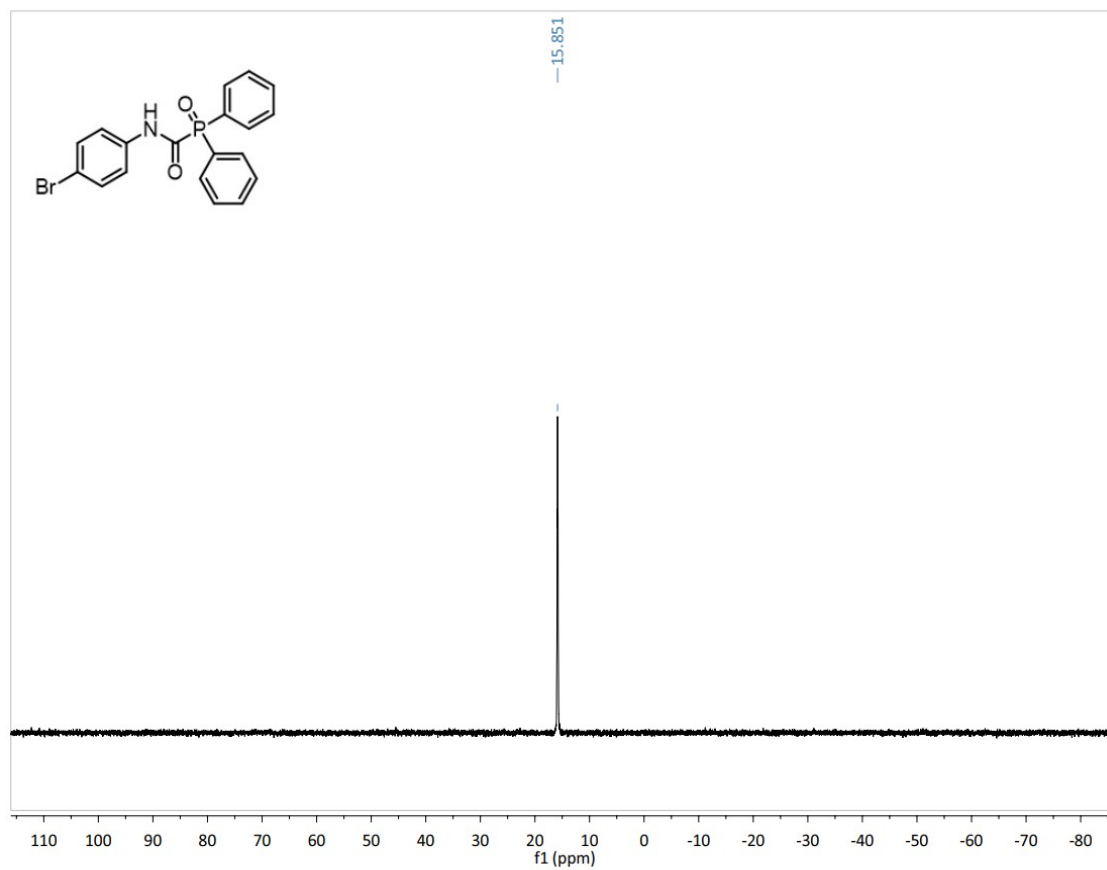

<sup>1</sup>H NMR (400 MHz, CDCl<sub>3</sub>) of compound **31**

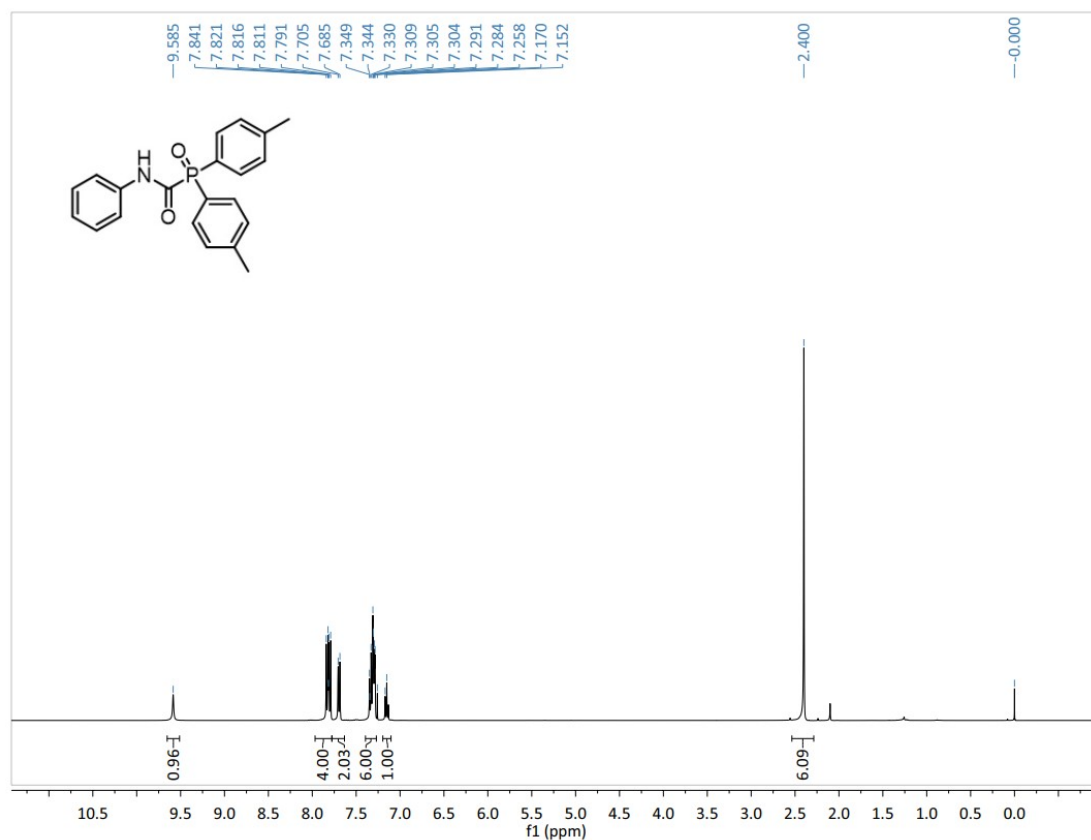

<sup>13</sup>C NMR (101 MHz, CDCl<sub>3</sub>) of compound **31**

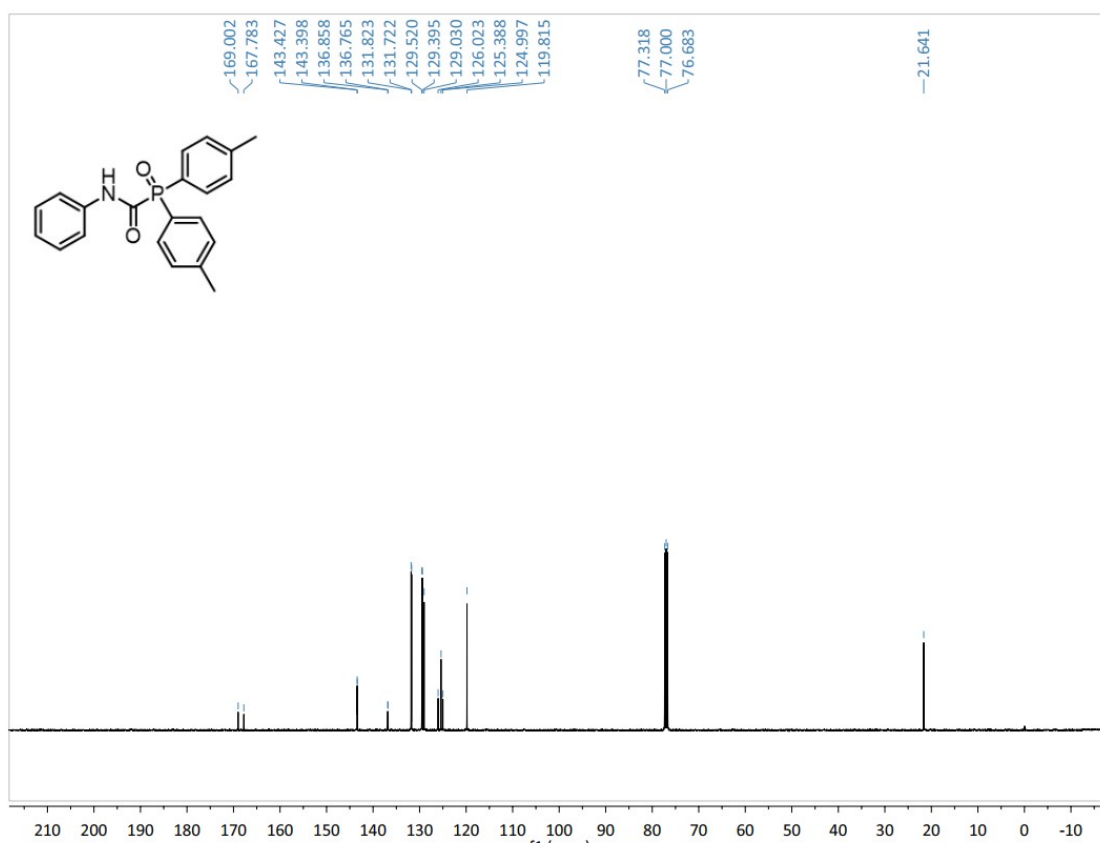

$^{31}\text{P}$  NMR (162 MHz,  $\text{CDCl}_3$ ) of compound **3l**

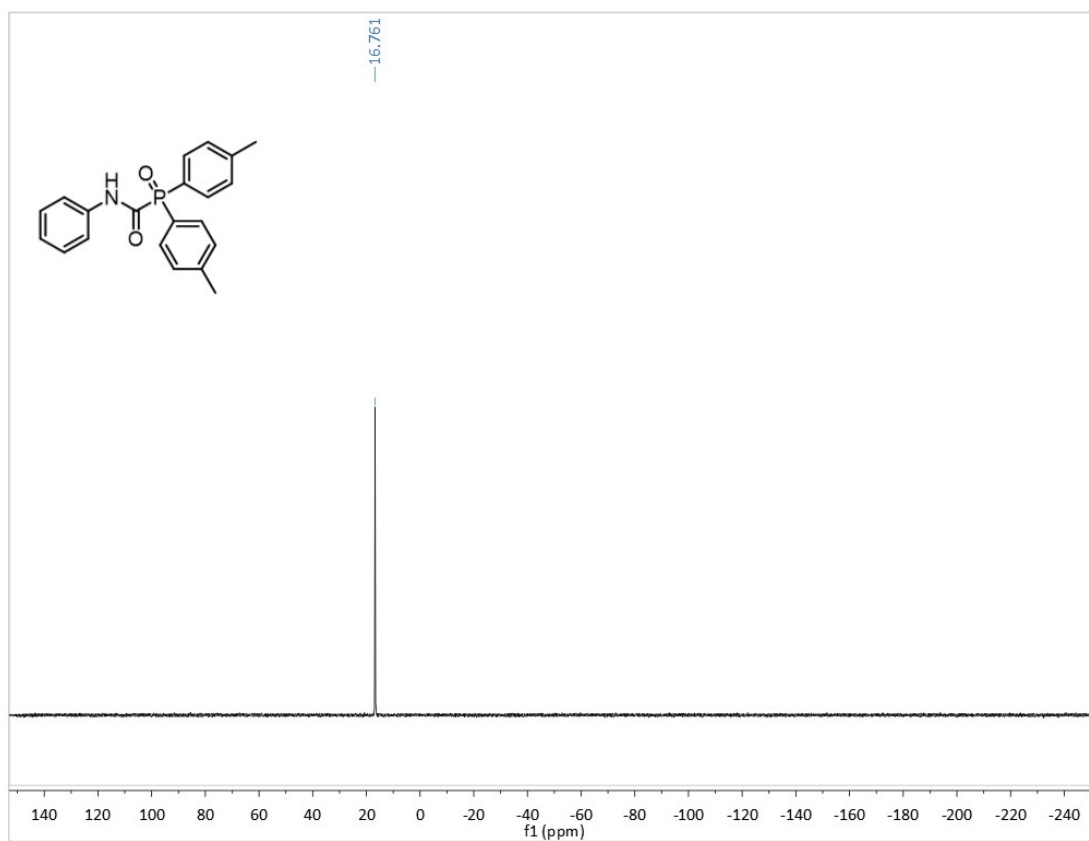

$^1\text{H}$  NMR (400 MHz,  $\text{CDCl}_3$ ) of compound **3m**

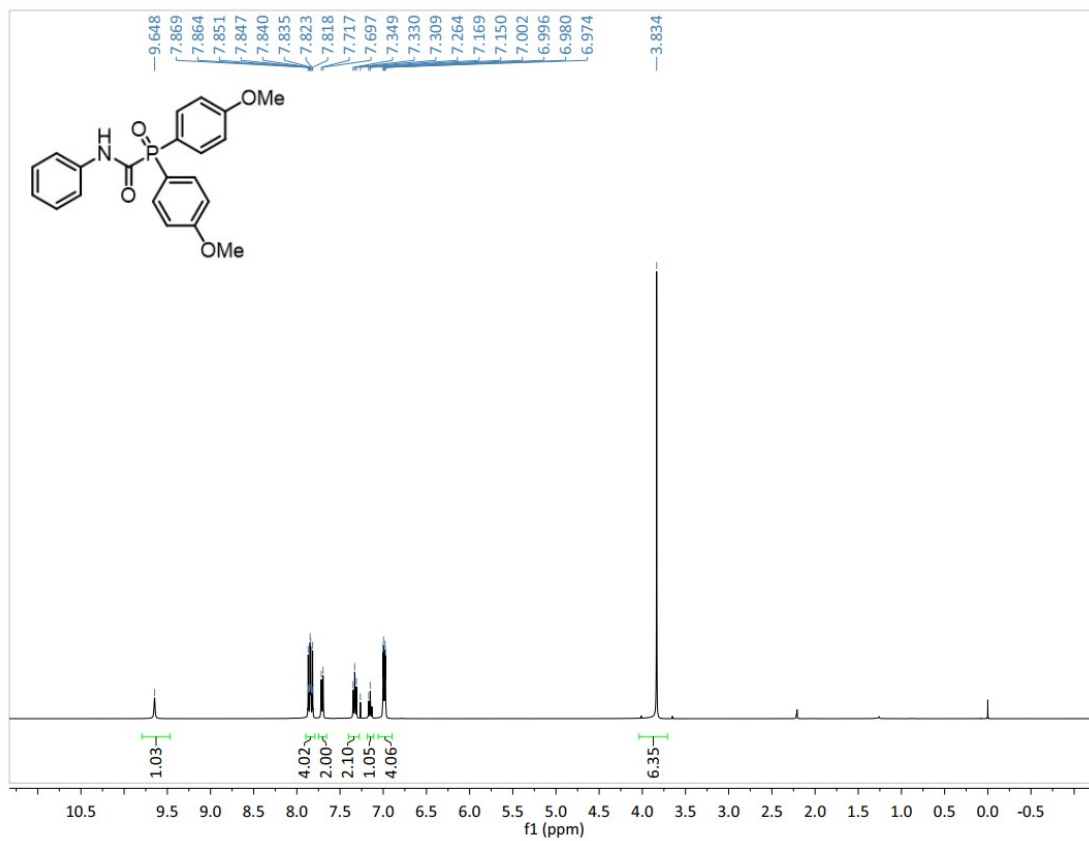

$^{13}\text{C}$  NMR (101 MHz,  $\text{CDCl}_3$ ) of compound **3m**

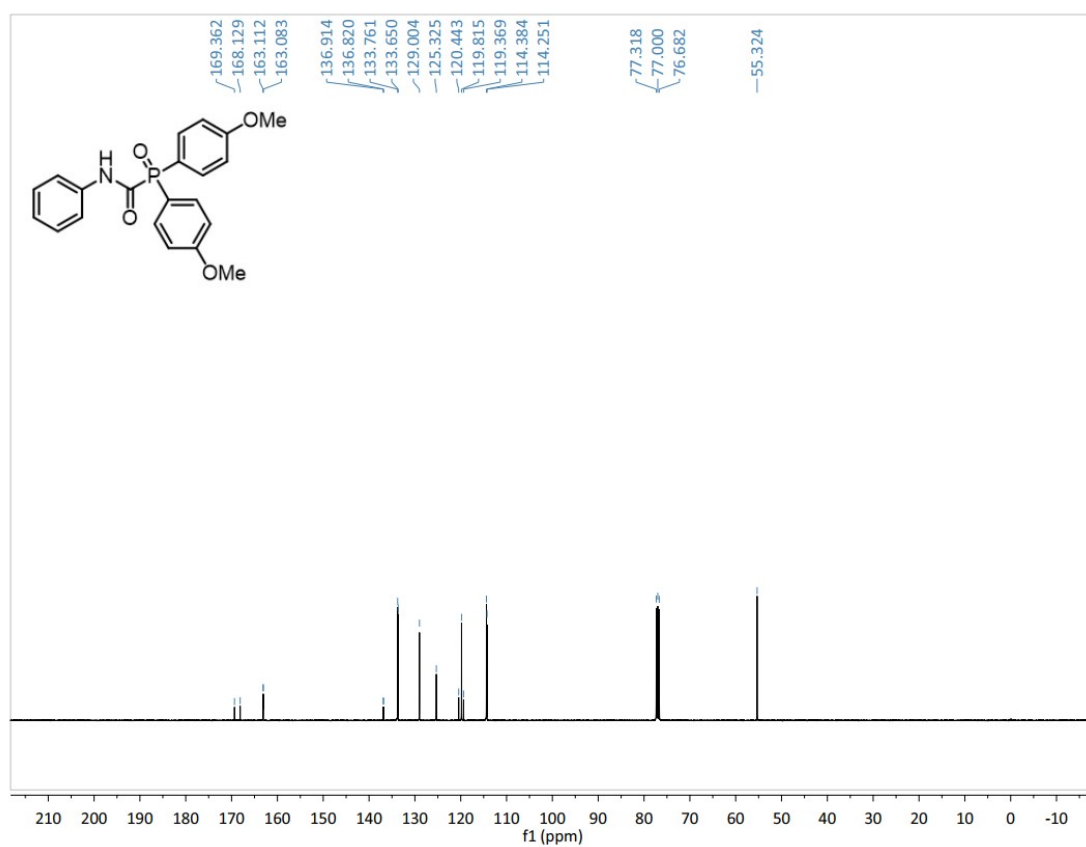

$^{31}\text{P}$  NMR (162 MHz,  $\text{CDCl}_3$ ) of compound **3m**

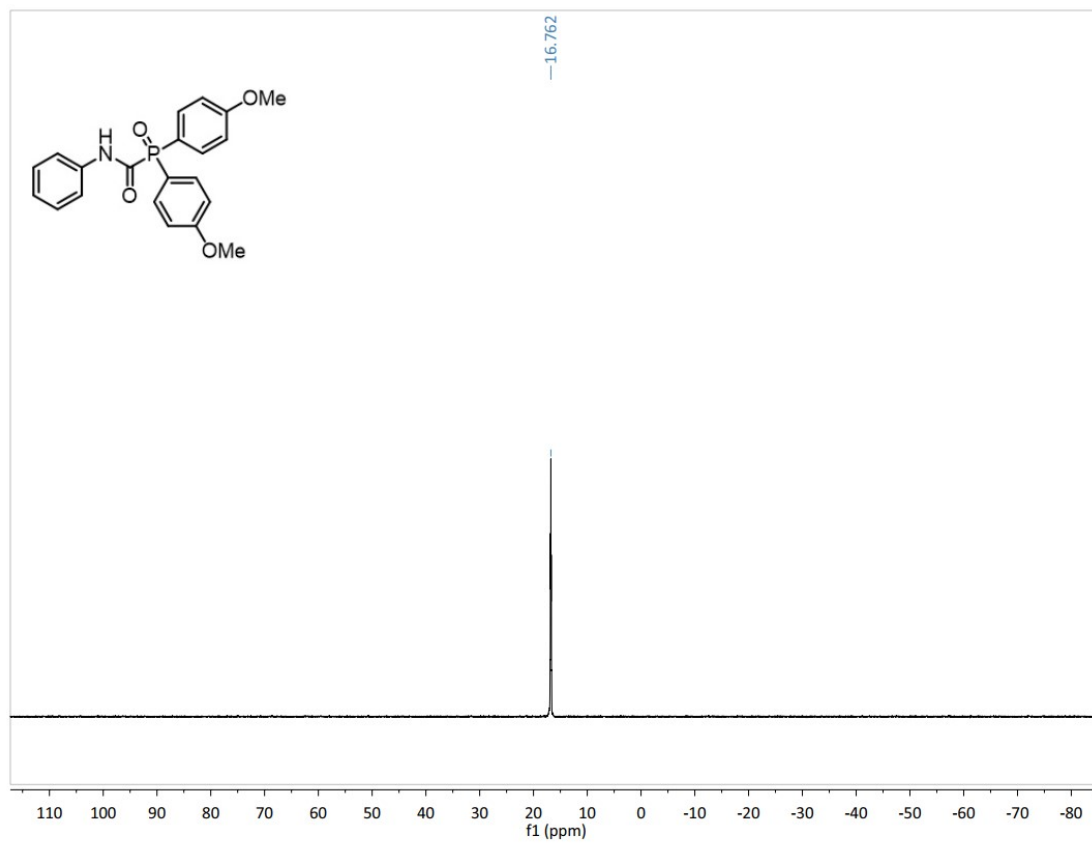

<sup>1</sup>H NMR (400 MHz, DMSO) of compound **3n**

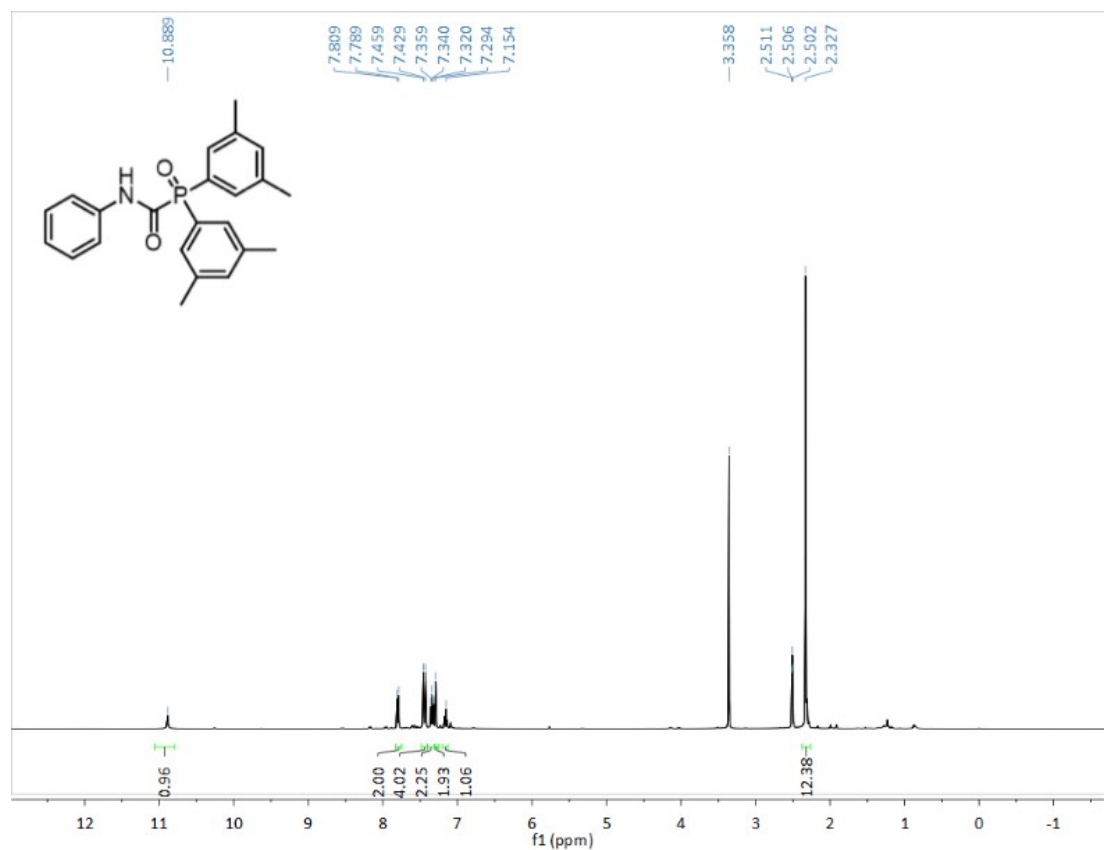

<sup>13</sup>C NMR (101 MHz, DMSO) of compound **3n**

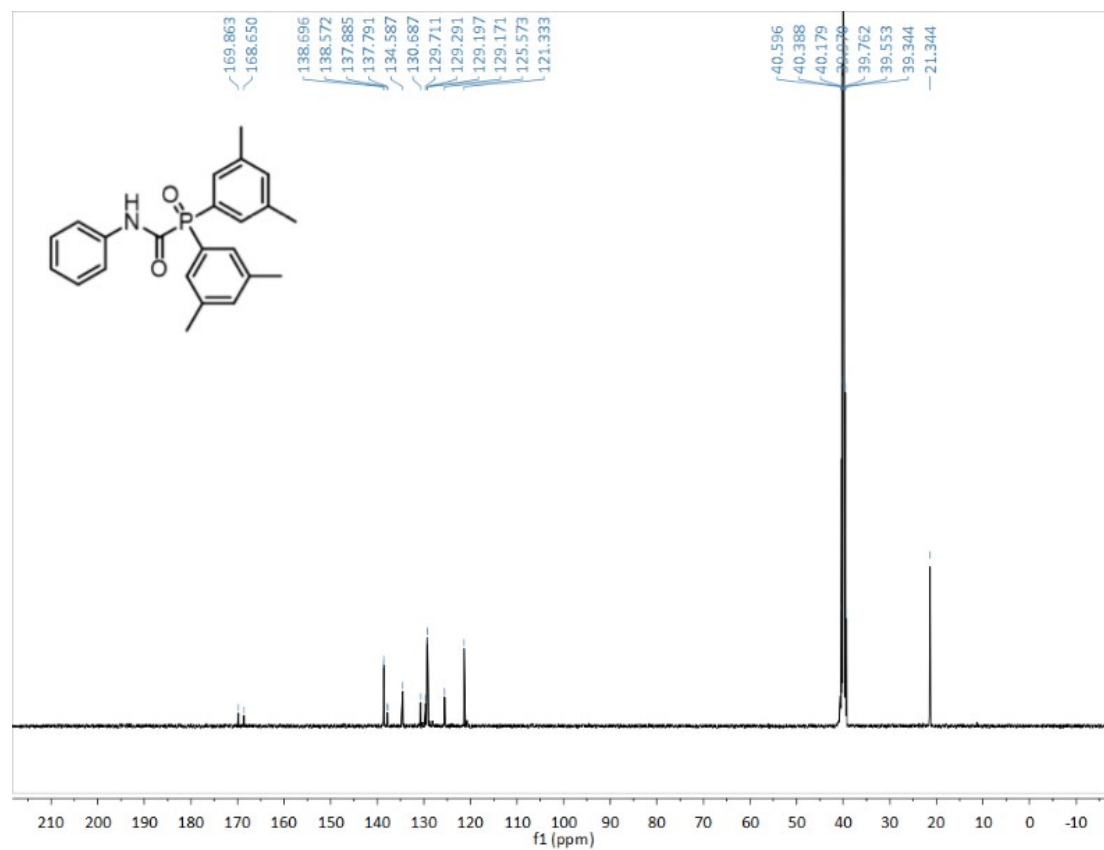

$^{31}\text{P}$  NMR (162 MHz, DMSO) of compound **3n**

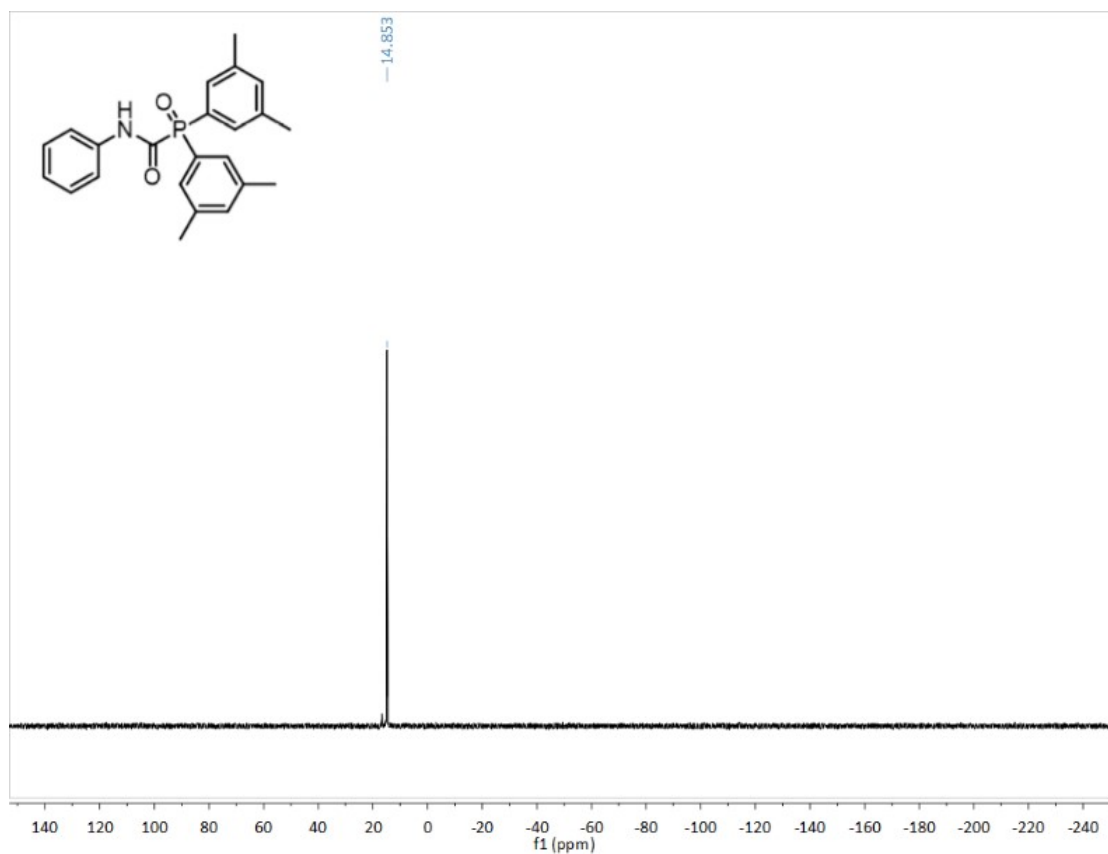

$^1\text{H}$  NMR (400 MHz,  $\text{CDCl}_3$ ) of compound **3o**

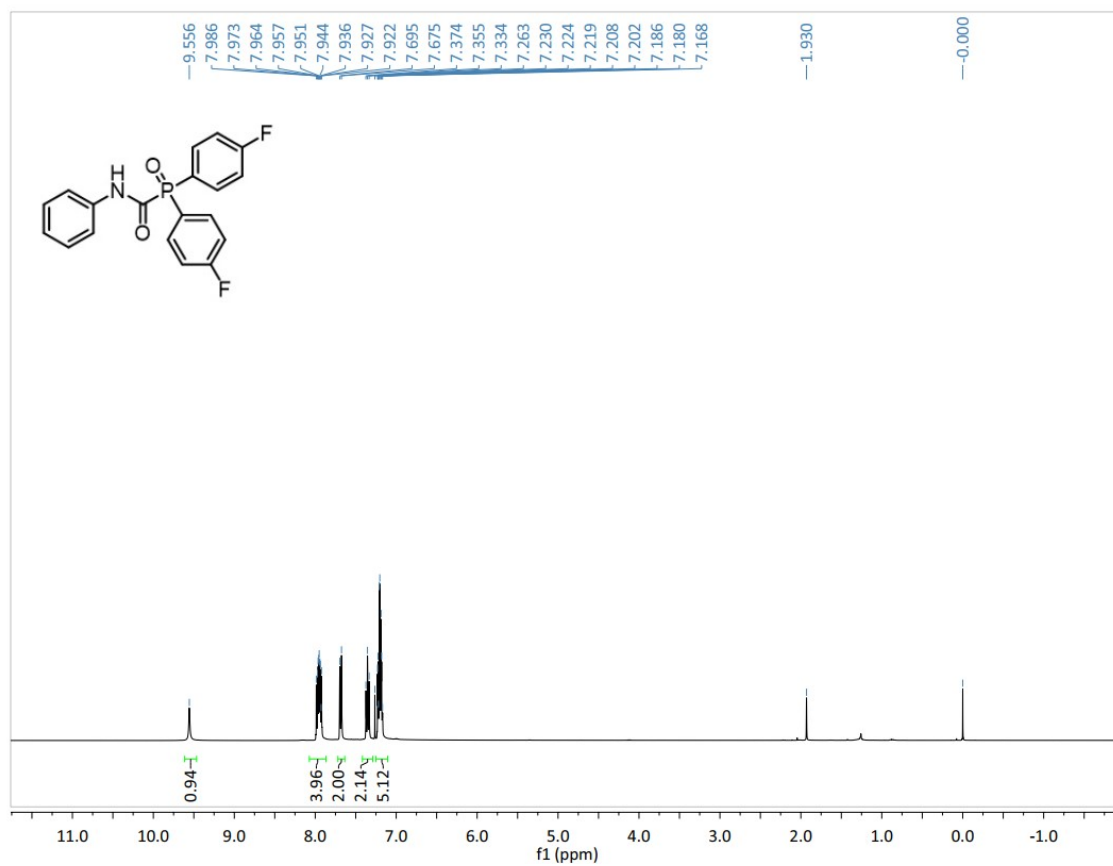



$^{13}\text{C}$  NMR (101 MHz,  $\text{CDCl}_3$ ) of compound **3o**

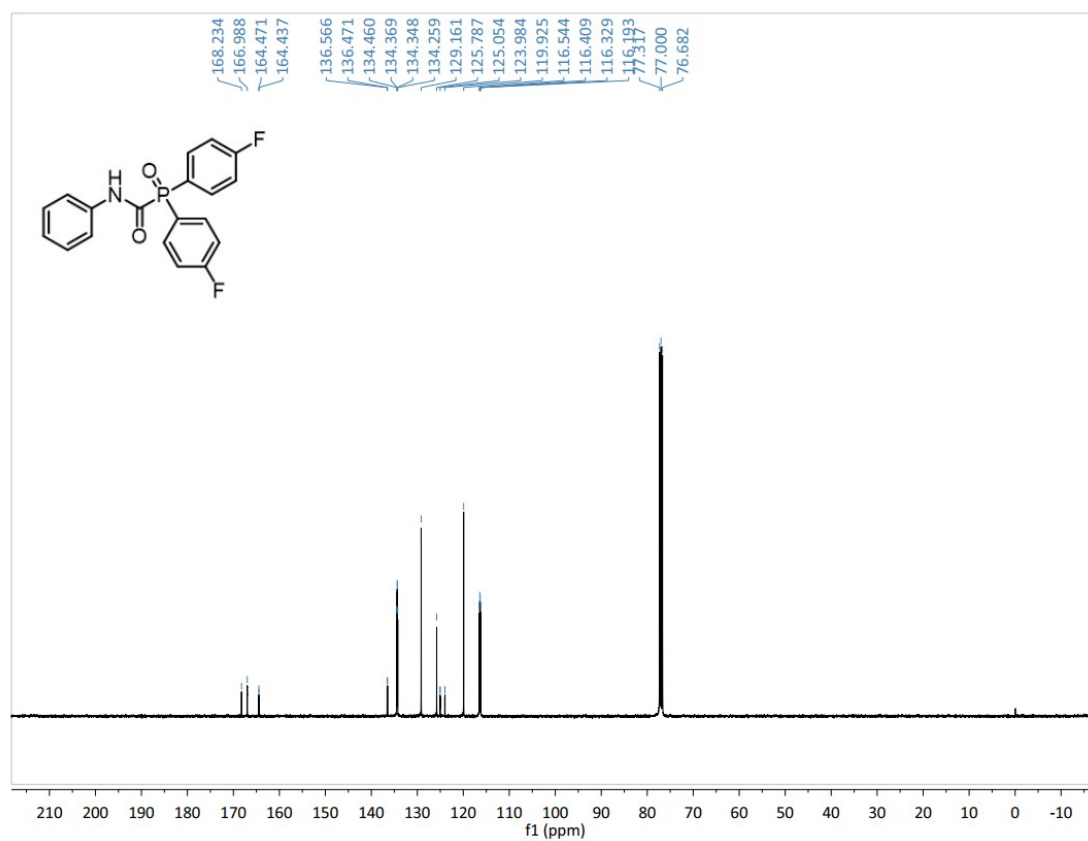

$^{31}\text{P}$  NMR (162 MHz,  $\text{CDCl}_3$ ) of compound **3o**

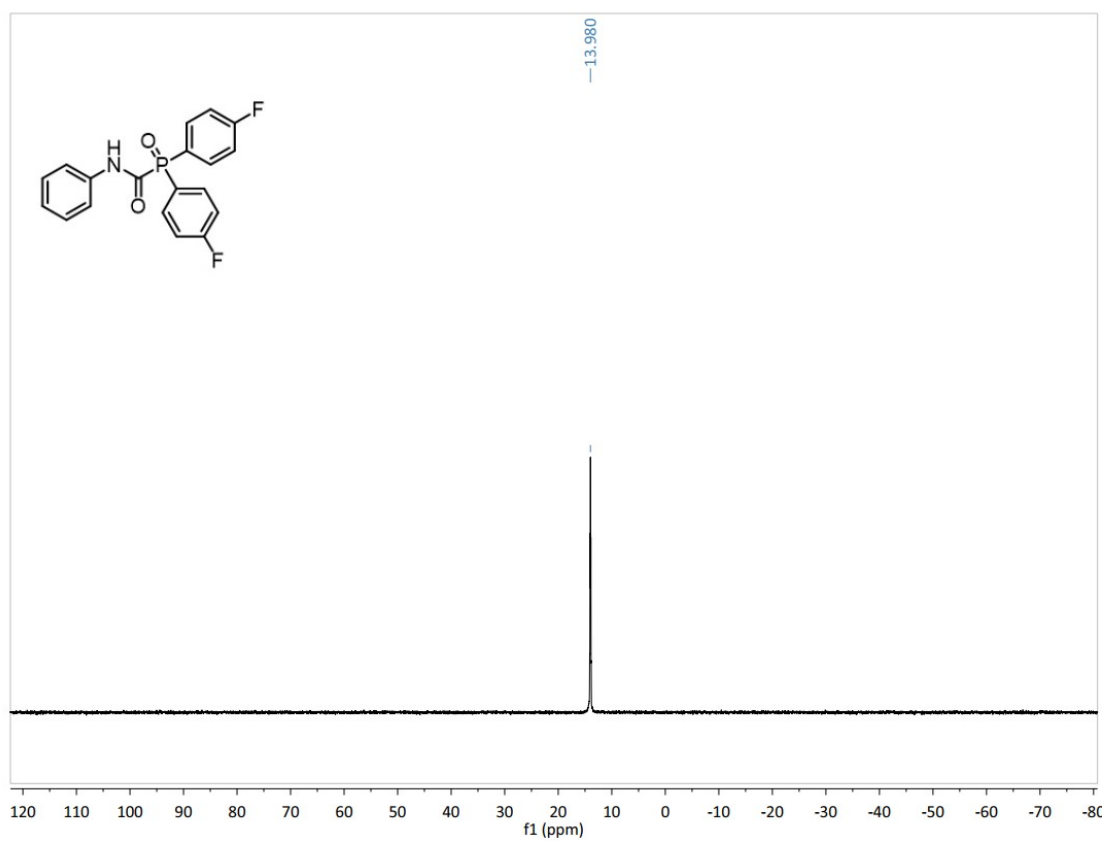

$^1\text{H}$  NMR (400 MHz,  $\text{CDCl}_3$ ) of compound **3p**

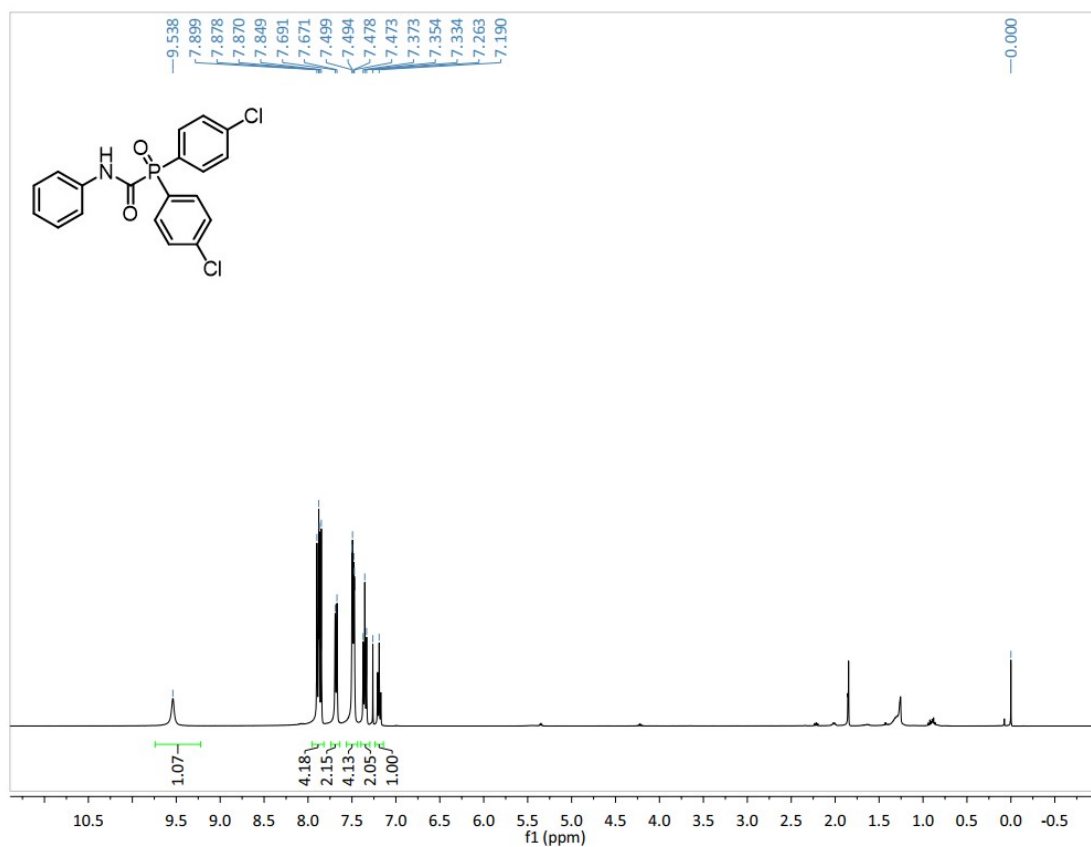

$^{13}\text{C}$  NMR (101 MHz,  $\text{CDCl}_3$ ) of compound **3p**

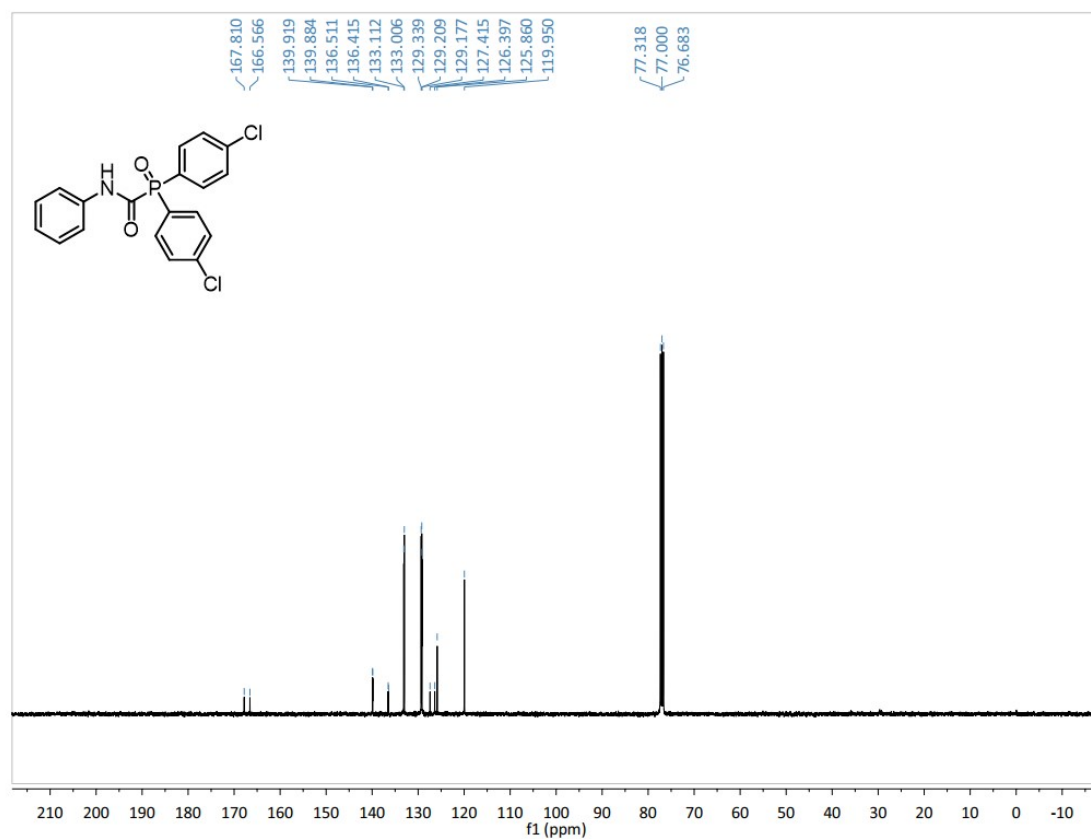

$^{31}\text{P}$  NMR (162 MHz,  $\text{CDCl}_3$ ) of compound **3p**

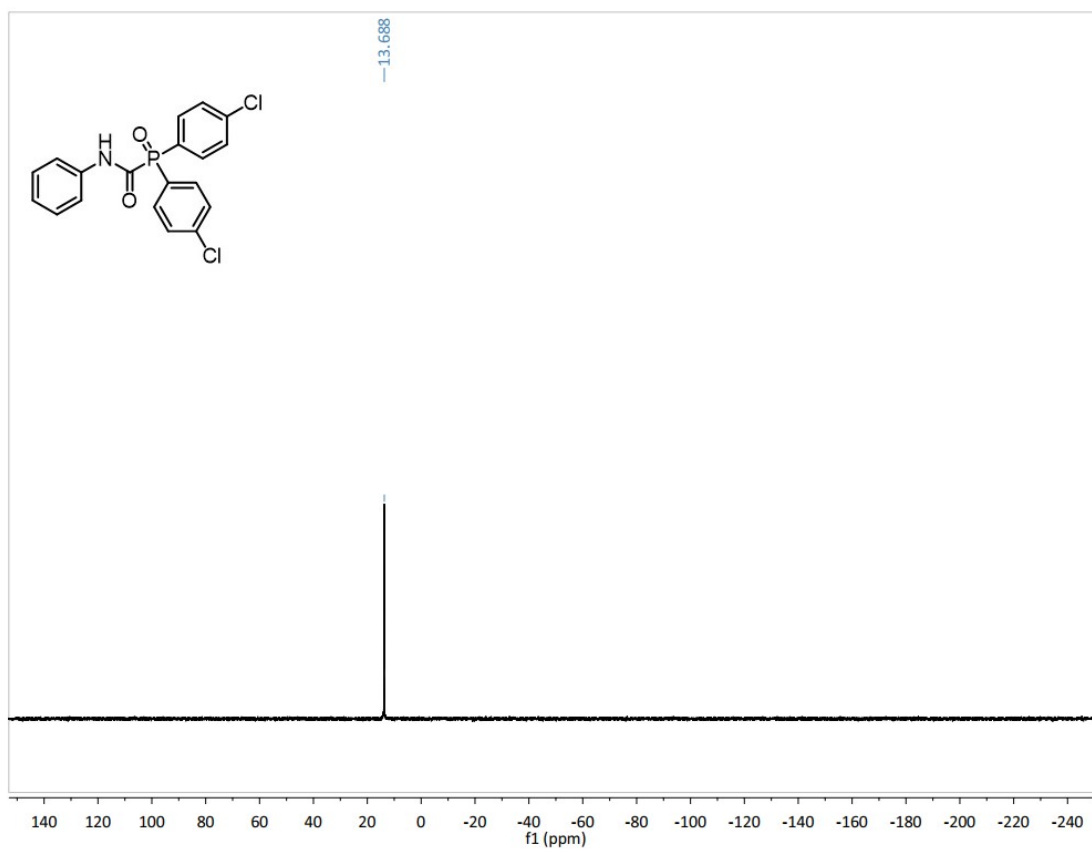

$^1\text{H}$  NMR (400 MHz,  $\text{CDCl}_3$ ) of compound **5a**

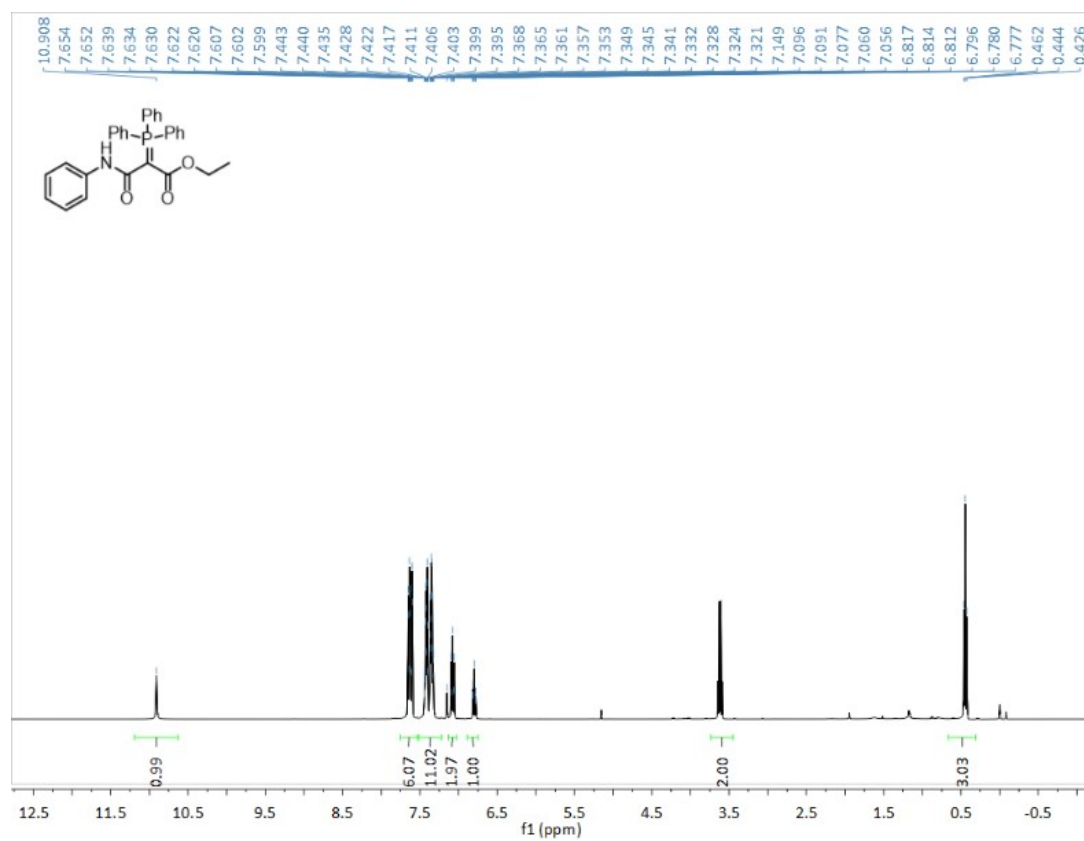

$^{13}\text{C}$  NMR (101 MHz,  $\text{CDCl}_3$ ) of compound **5a**

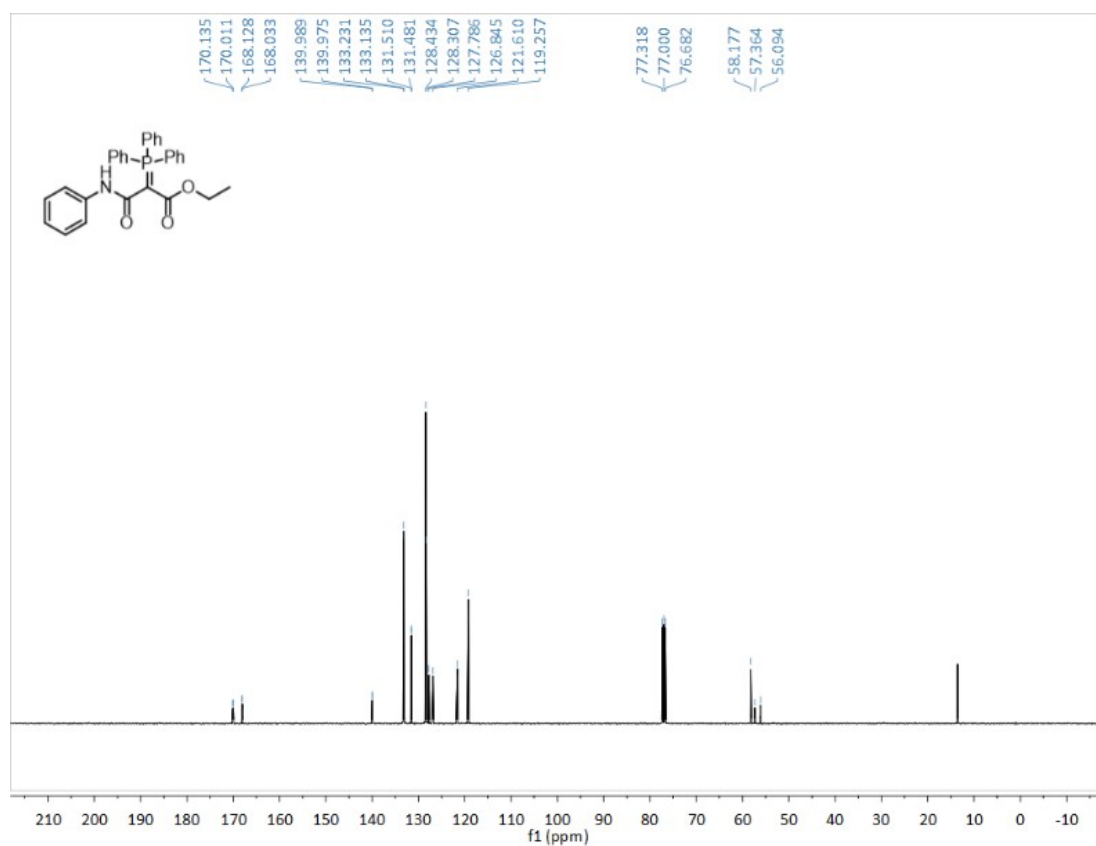

$^{31}\text{P}$  NMR (162 MHz,  $\text{CDCl}_3$ ) of compound **5a**

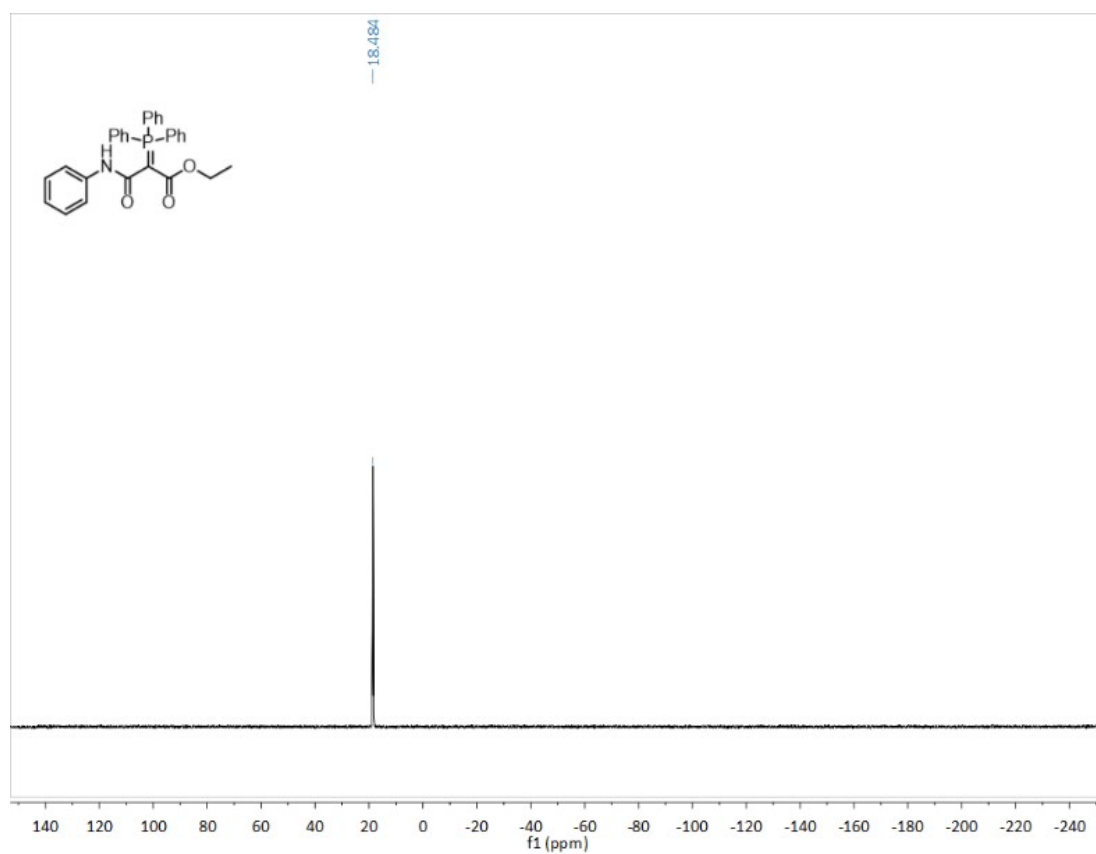

<sup>1</sup>H NMR (400 MHz, CDCl<sub>3</sub>) of compound **5b**

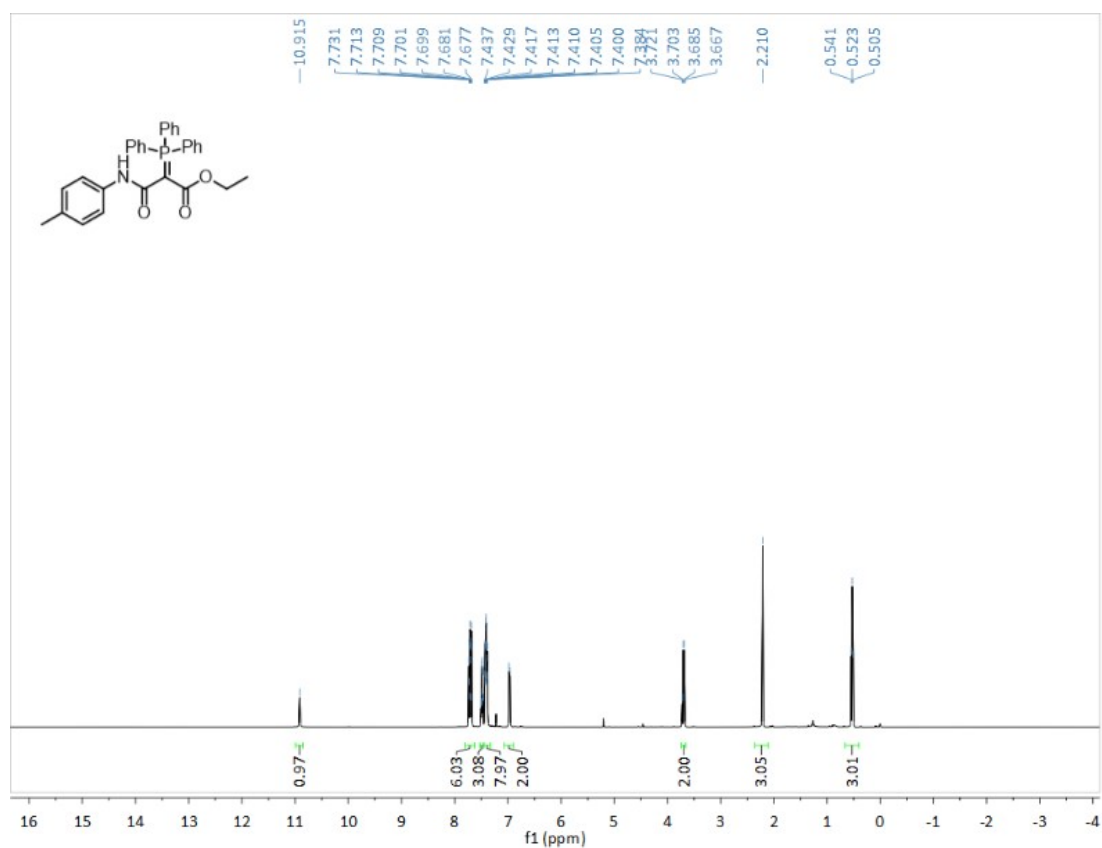

<sup>13</sup>C NMR (101 MHz, CDCl<sub>3</sub>) of compound **5b**

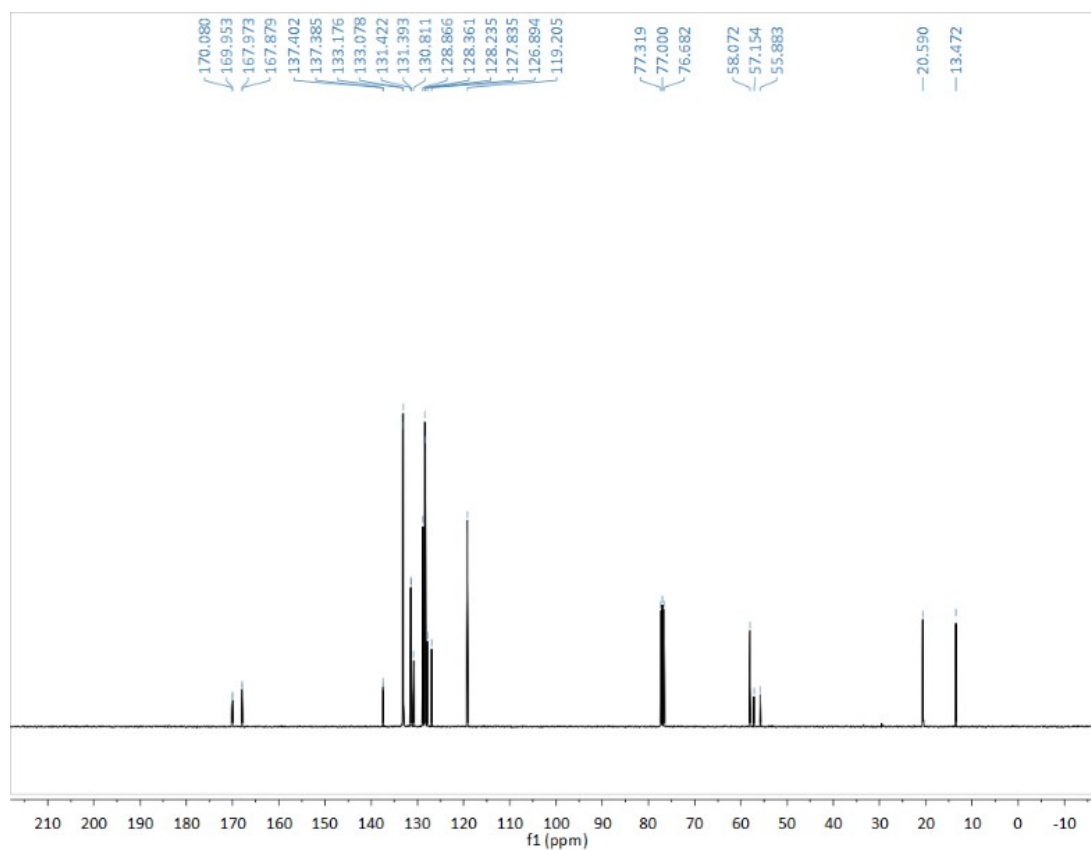

$^{31}\text{P}$  NMR (162 MHz,  $\text{CDCl}_3$ ) of compound **5b**

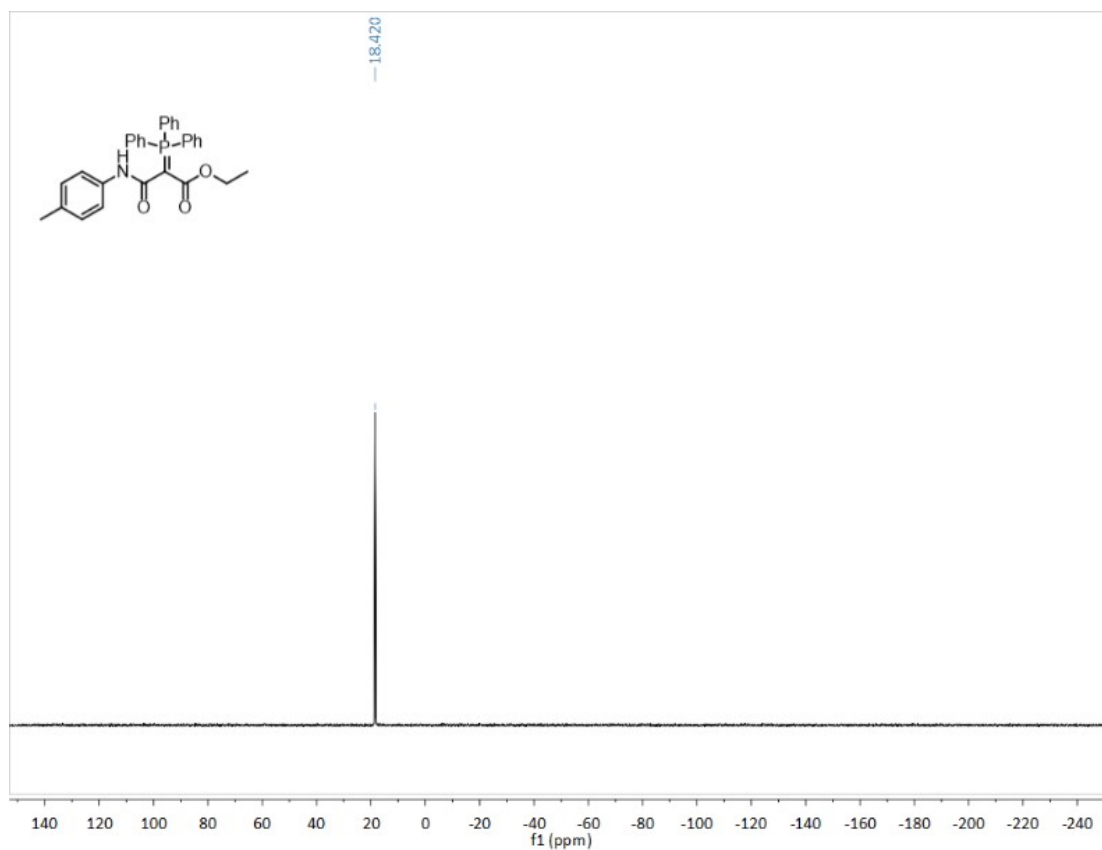

$^1\text{H}$  NMR (400 MHz,  $\text{CDCl}_3$ ) of compound **5c**

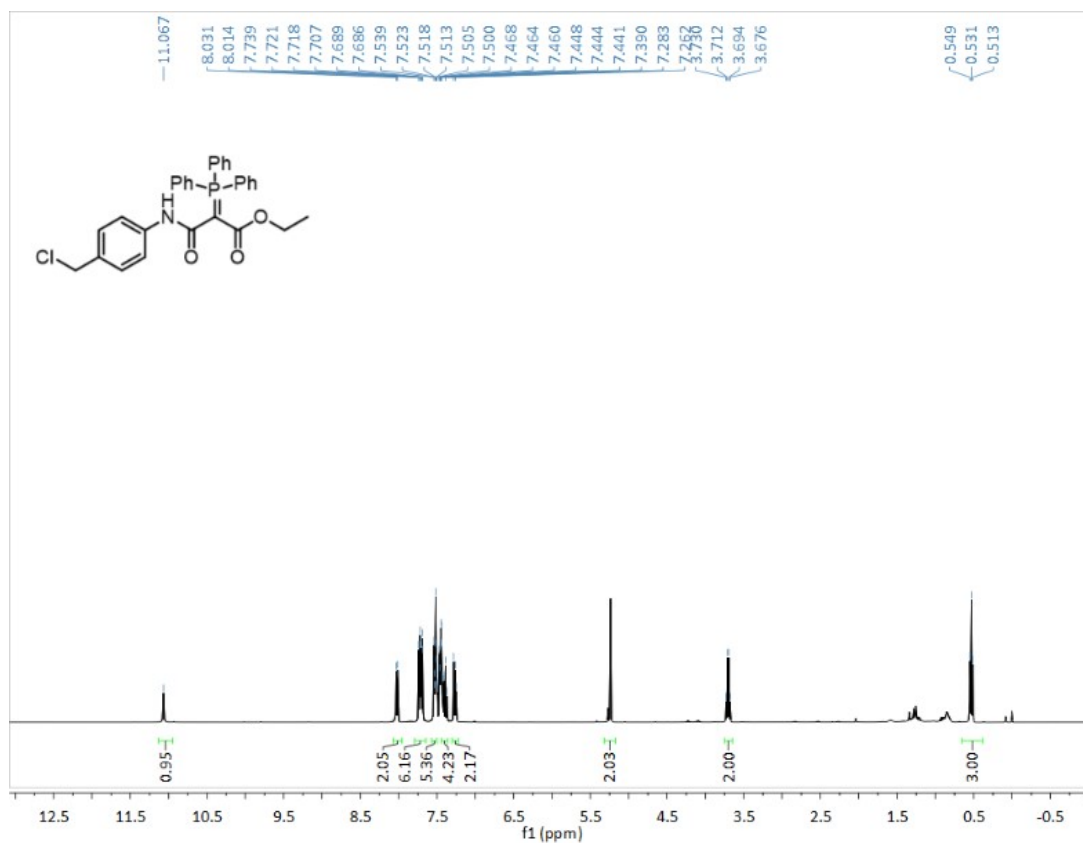

$^{13}\text{C}$  NMR (101 MHz,  $\text{CDCl}_3$ ) of compound **5c**

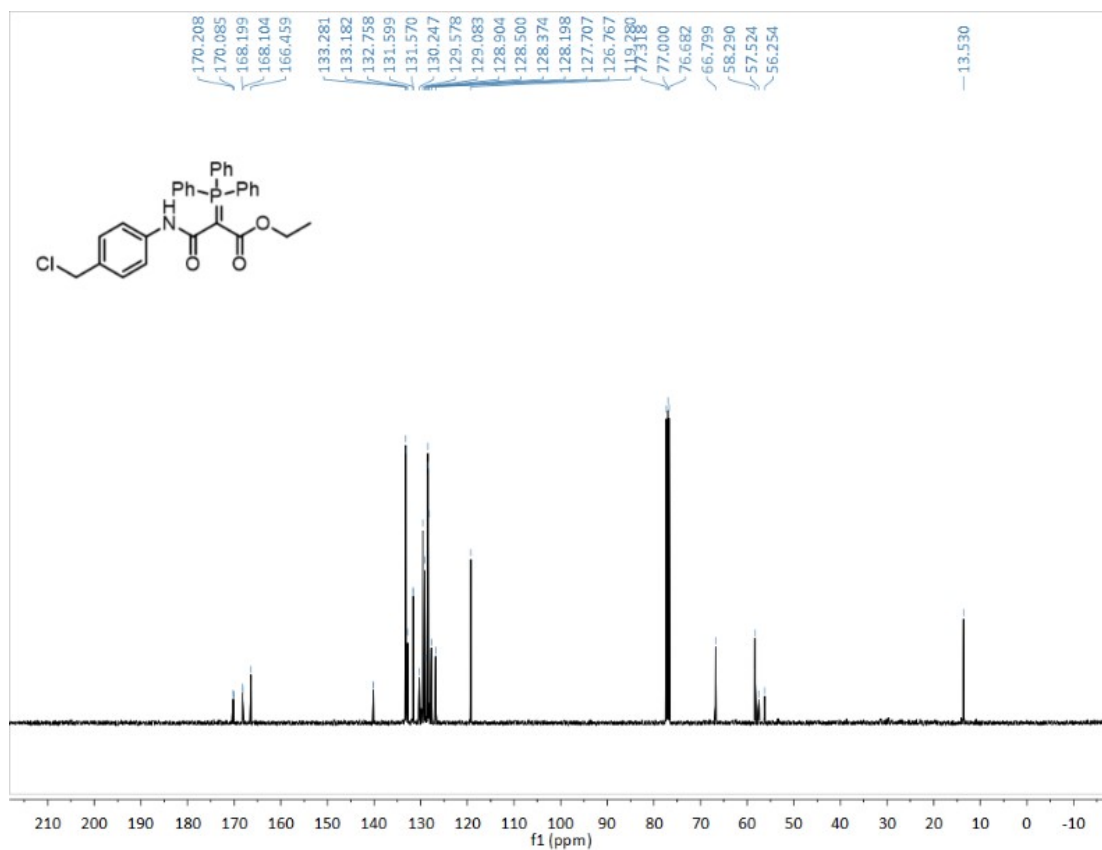

$^{31}\text{P}$  NMR (162 MHz,  $\text{CDCl}_3$ ) of compound **5c**

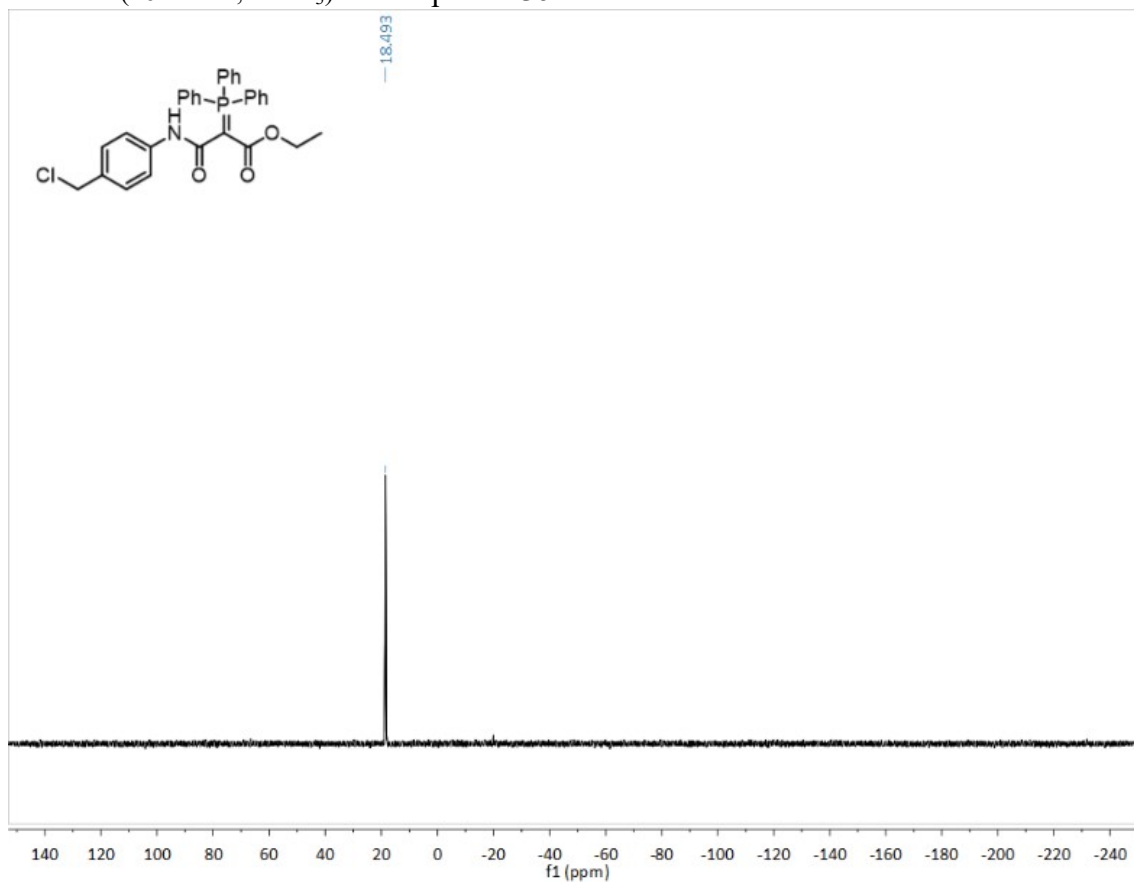

<sup>1</sup>H NMR (400 MHz, CDCl<sub>3</sub>) of compound **5d**

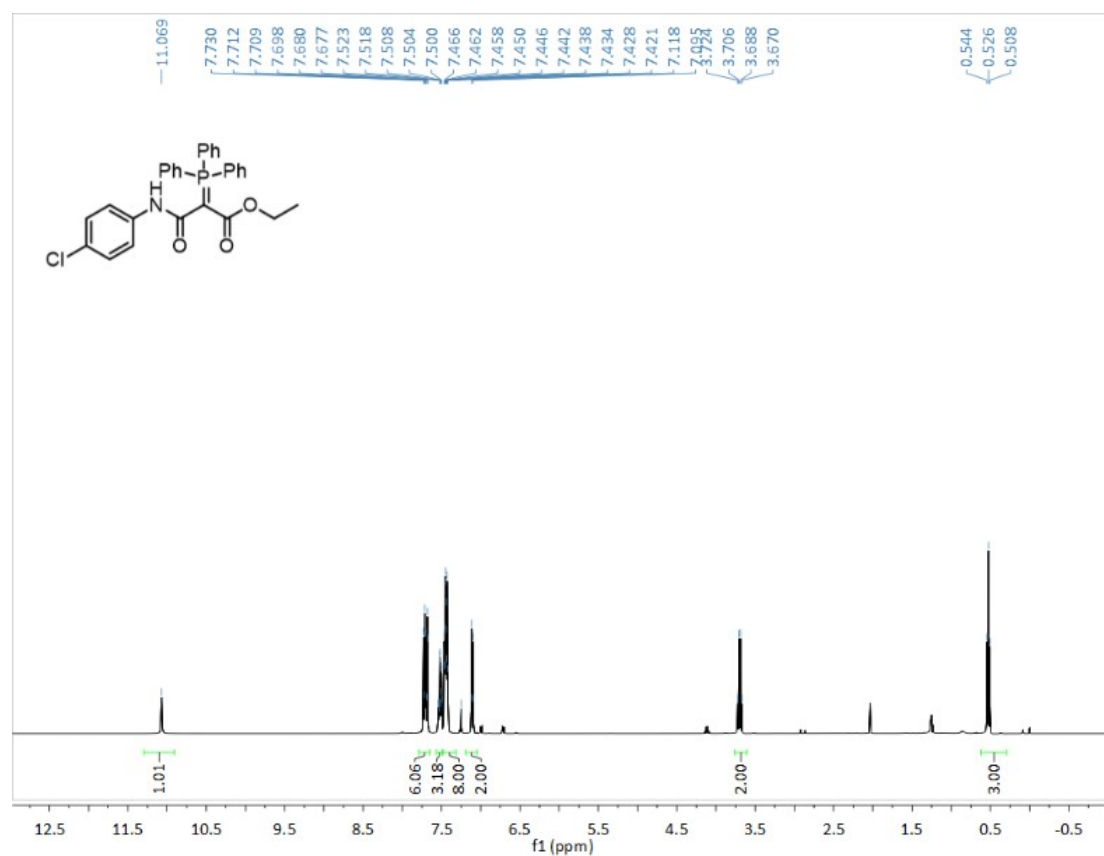

<sup>13</sup>C NMR (101 MHz, CDCl<sub>3</sub>) of compound **5d**

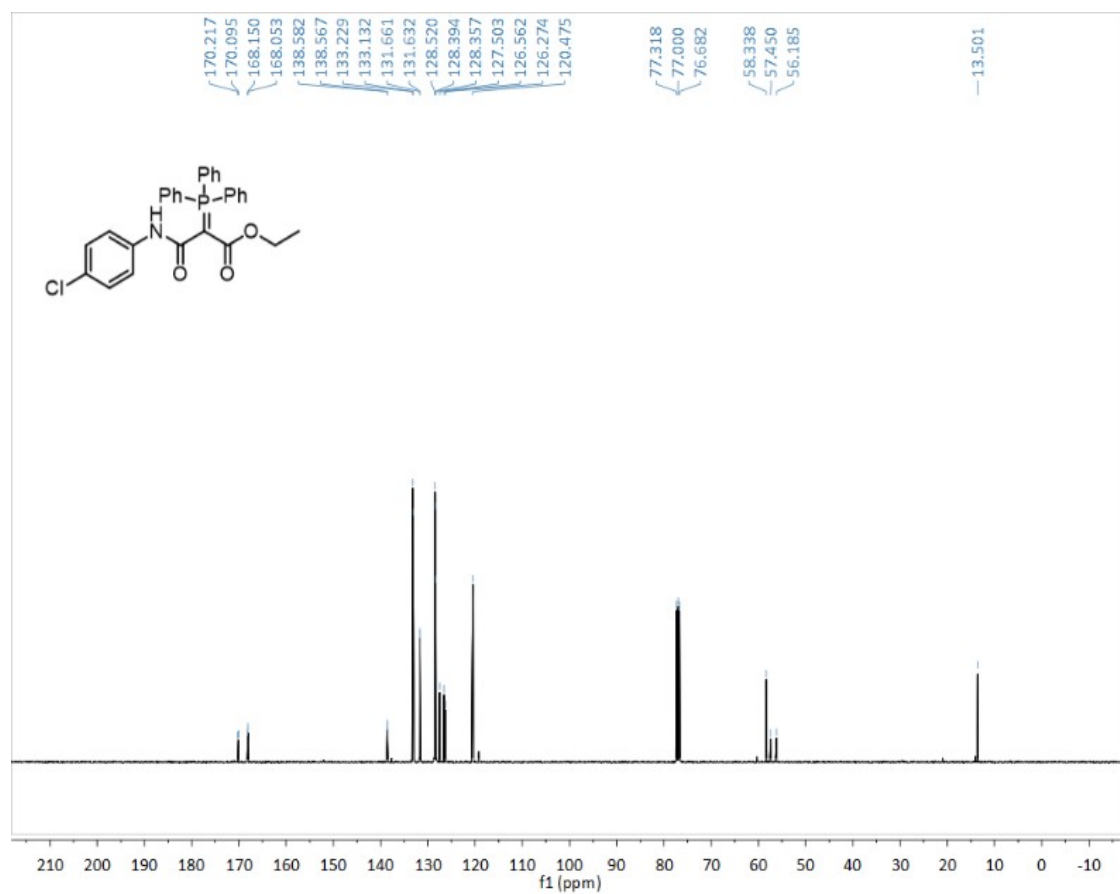



$^{31}\text{P}$  NMR (162 MHz,  $\text{CDCl}_3$ ) of compound **5d**

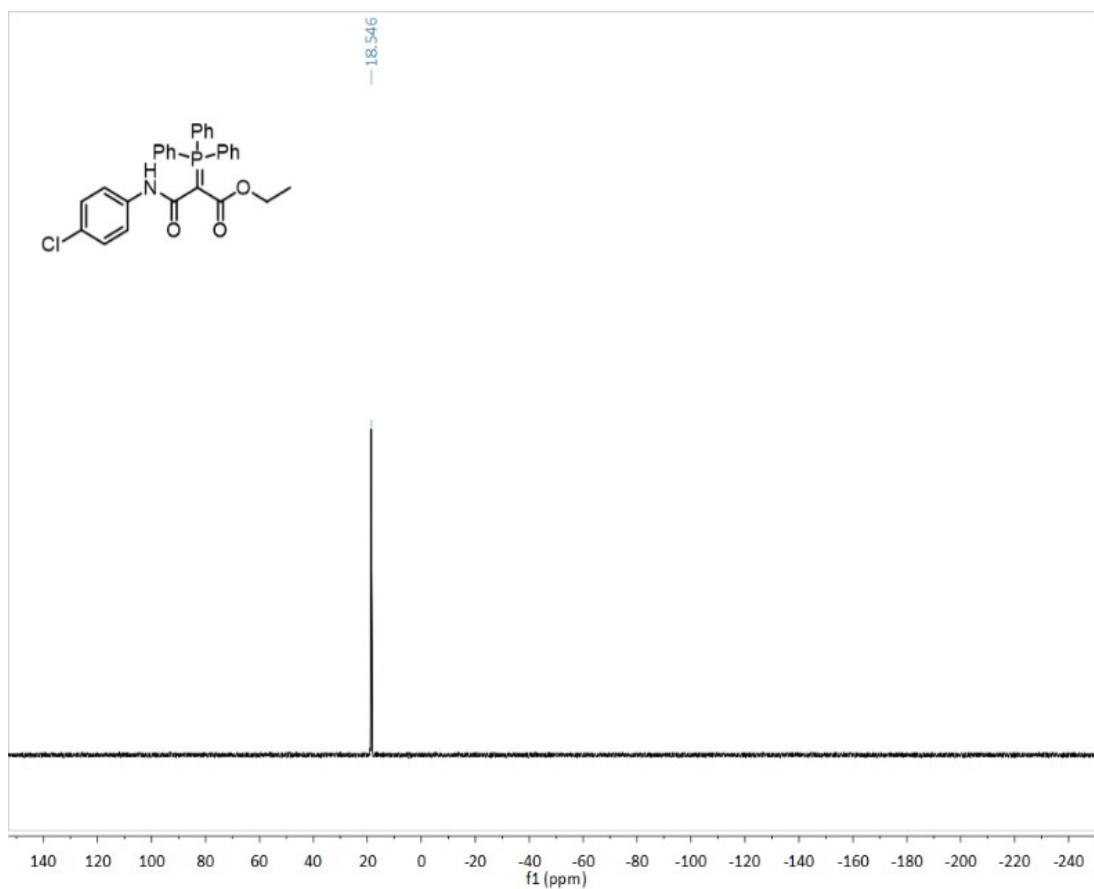

$^1\text{H}$  NMR (400 MHz,  $\text{CDCl}_3$ ) of compound **5e**

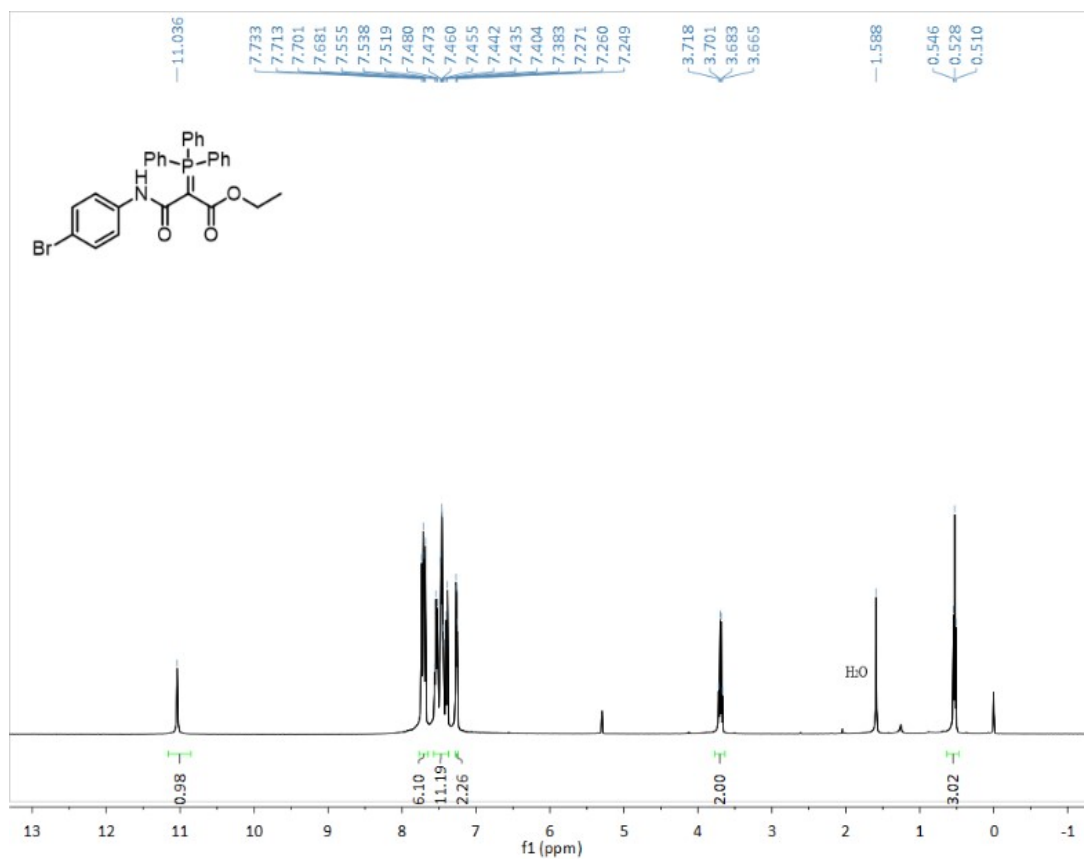

$^{13}\text{C}$  NMR (101 MHz,  $\text{CDCl}_3$ ) of compound **5e**

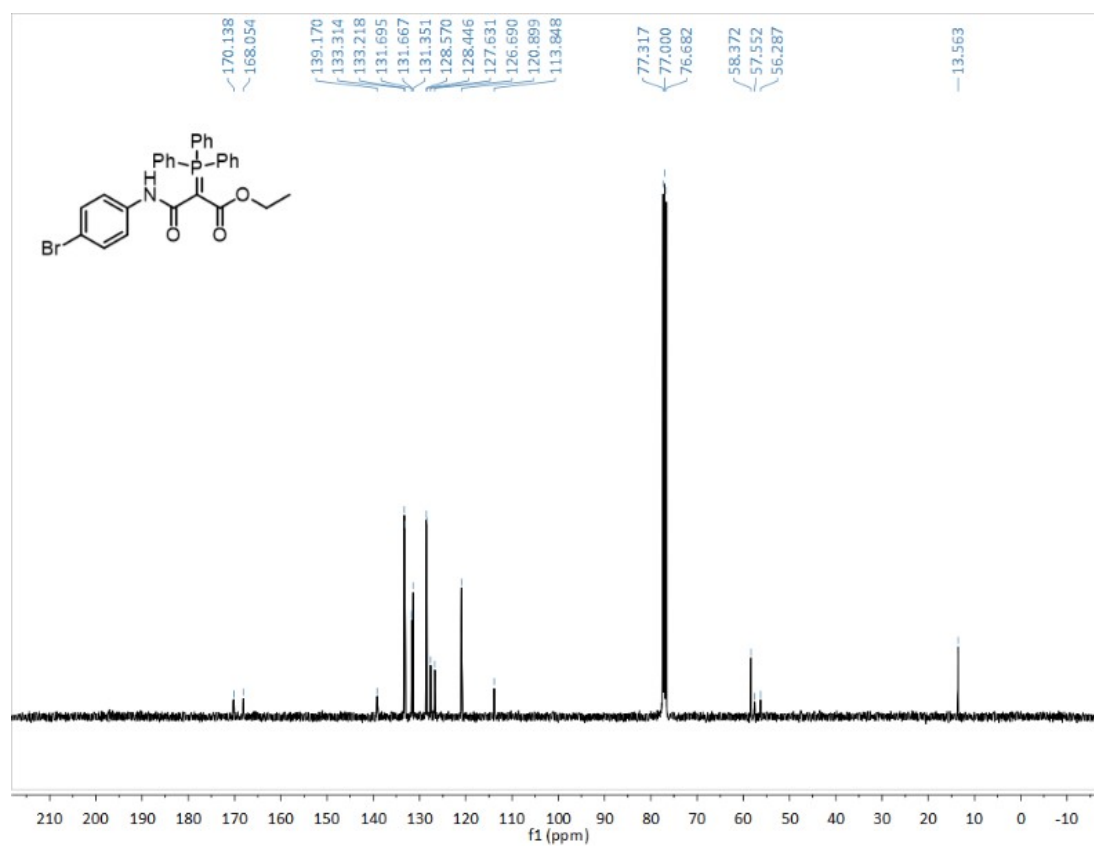

$^{31}\text{P}$  NMR (162 MHz,  $\text{CDCl}_3$ ) of compound **5e**

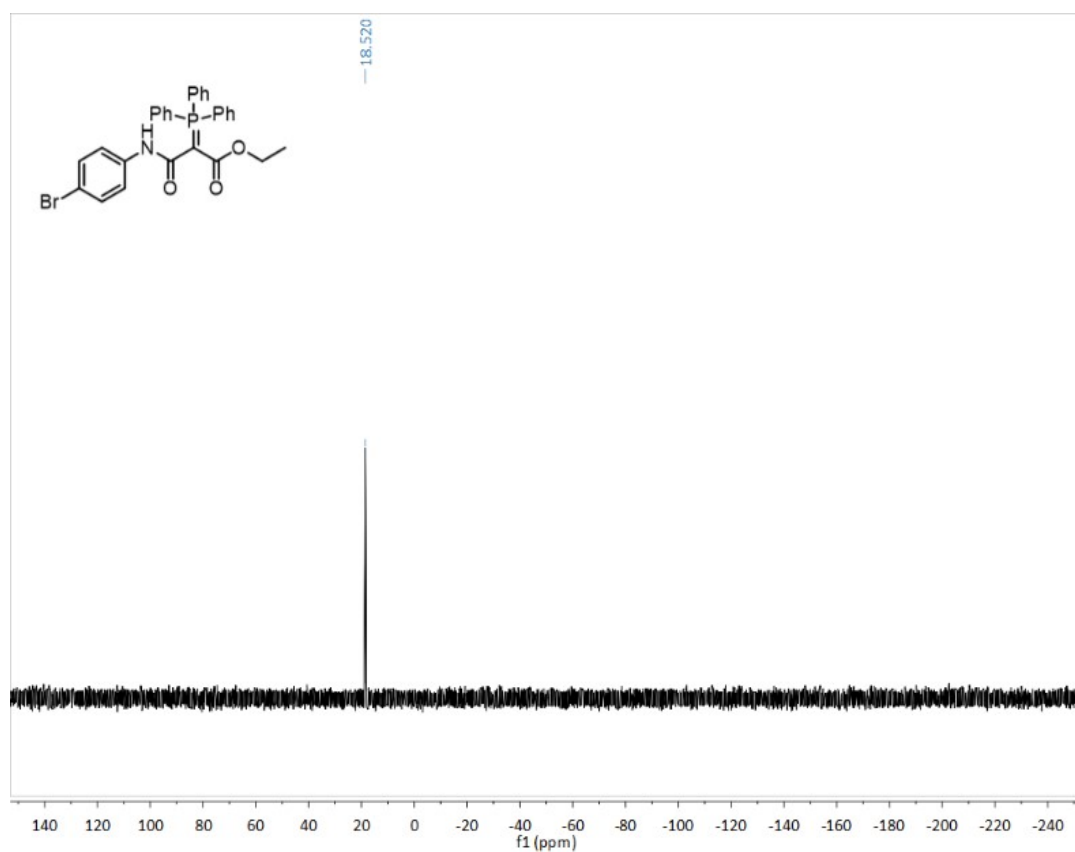

<sup>1</sup>H NMR (400 MHz, CDCl<sub>3</sub>) of compound **5f**

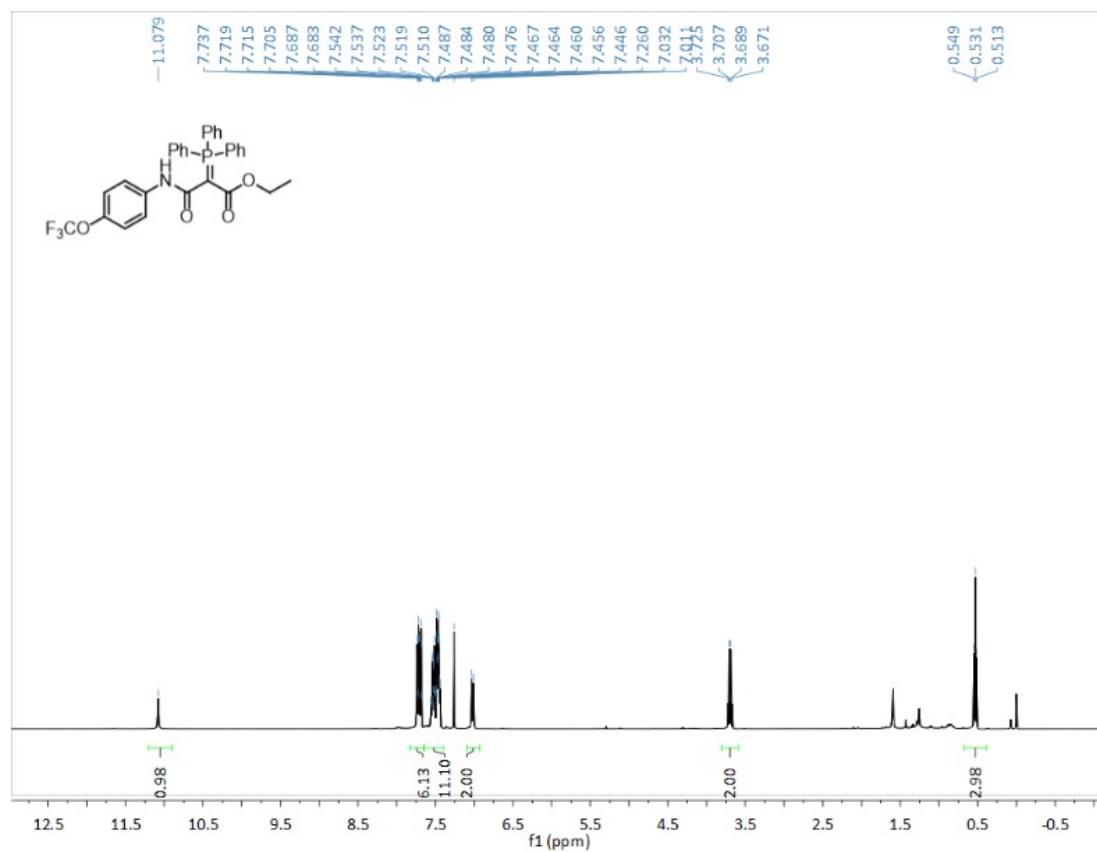

<sup>13</sup>C NMR (101 MHz, CDCl<sub>3</sub>) of compound **5f**

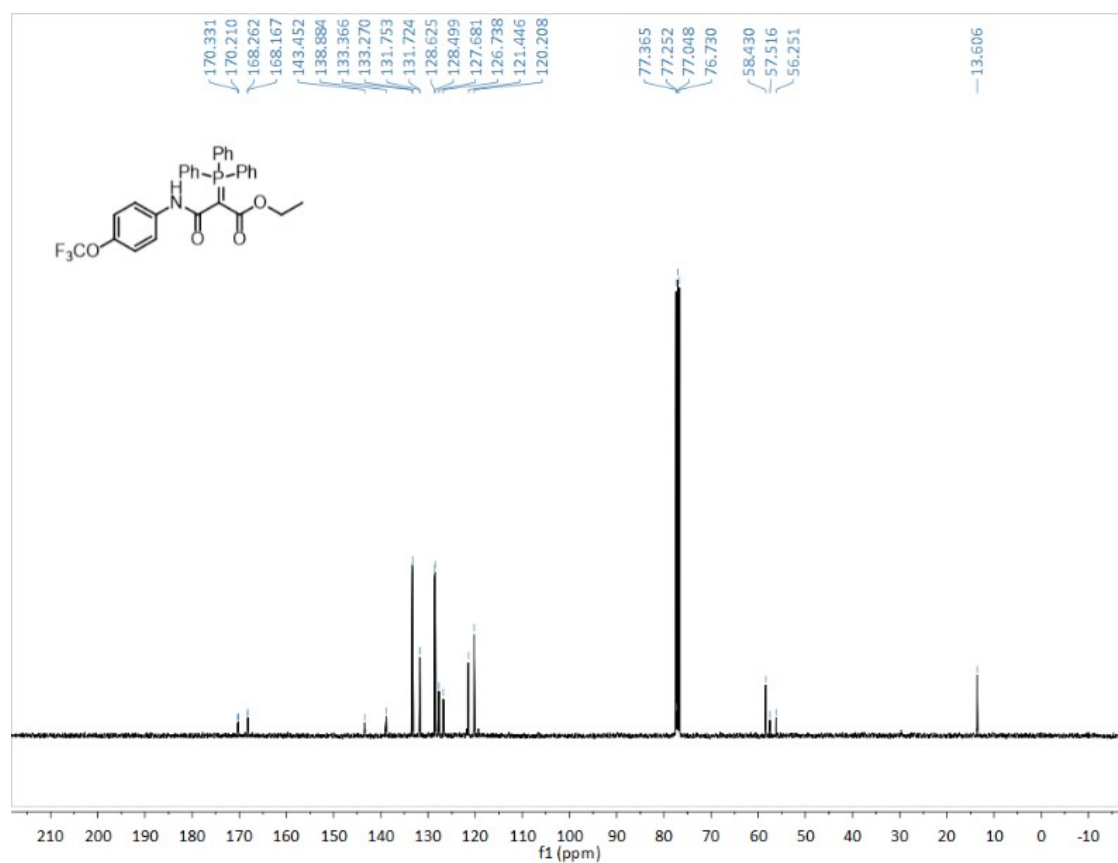

$^{31}\text{P}$  NMR (162 MHz,  $\text{CDCl}_3$ ) of compound **5f**

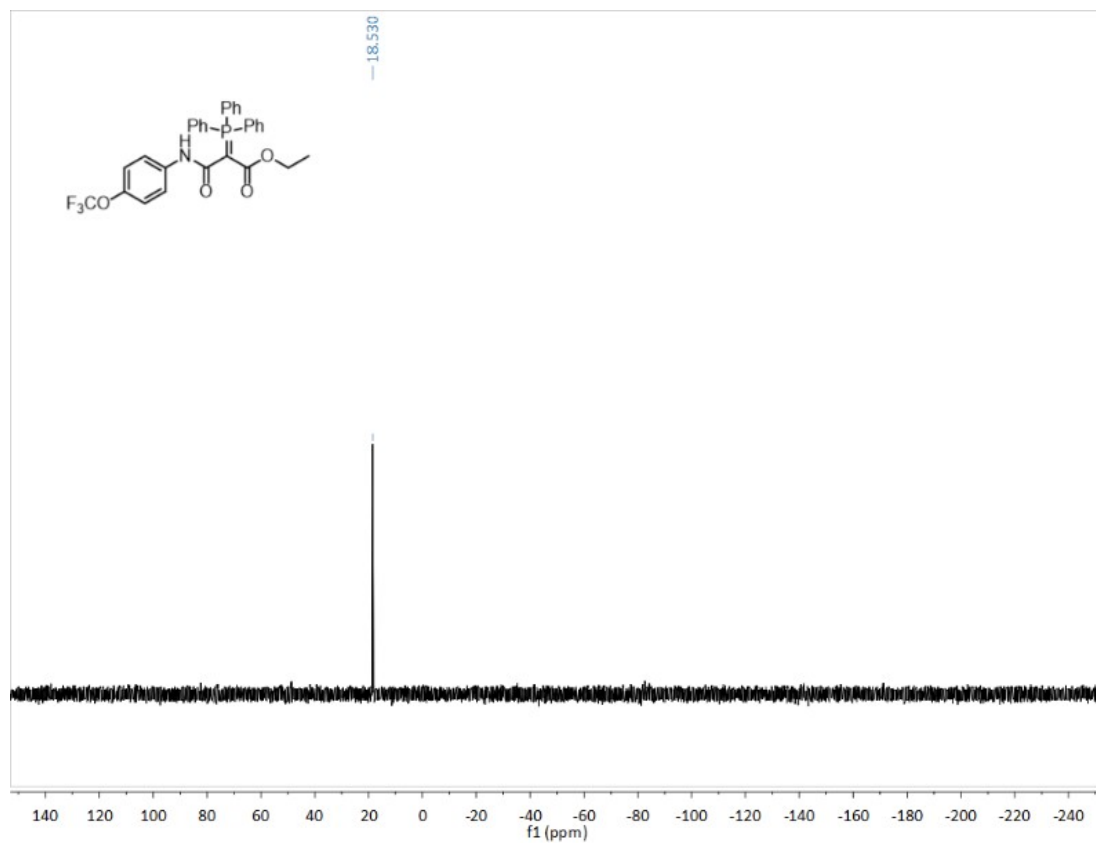

$^1\text{H}$  NMR (400 MHz,  $\text{CDCl}_3$ ) of compound **5g**

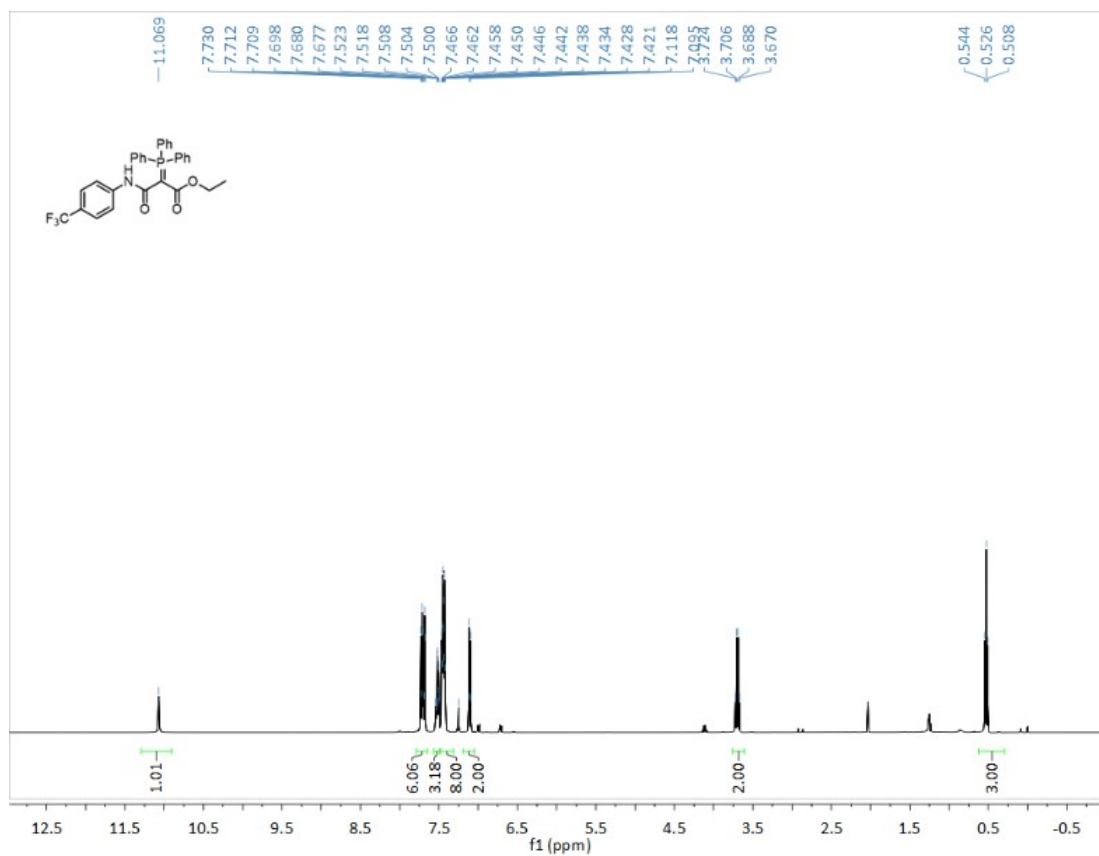

$^{13}\text{C}$  NMR (101 MHz,  $\text{CDCl}_3$ ) of compound **5g**

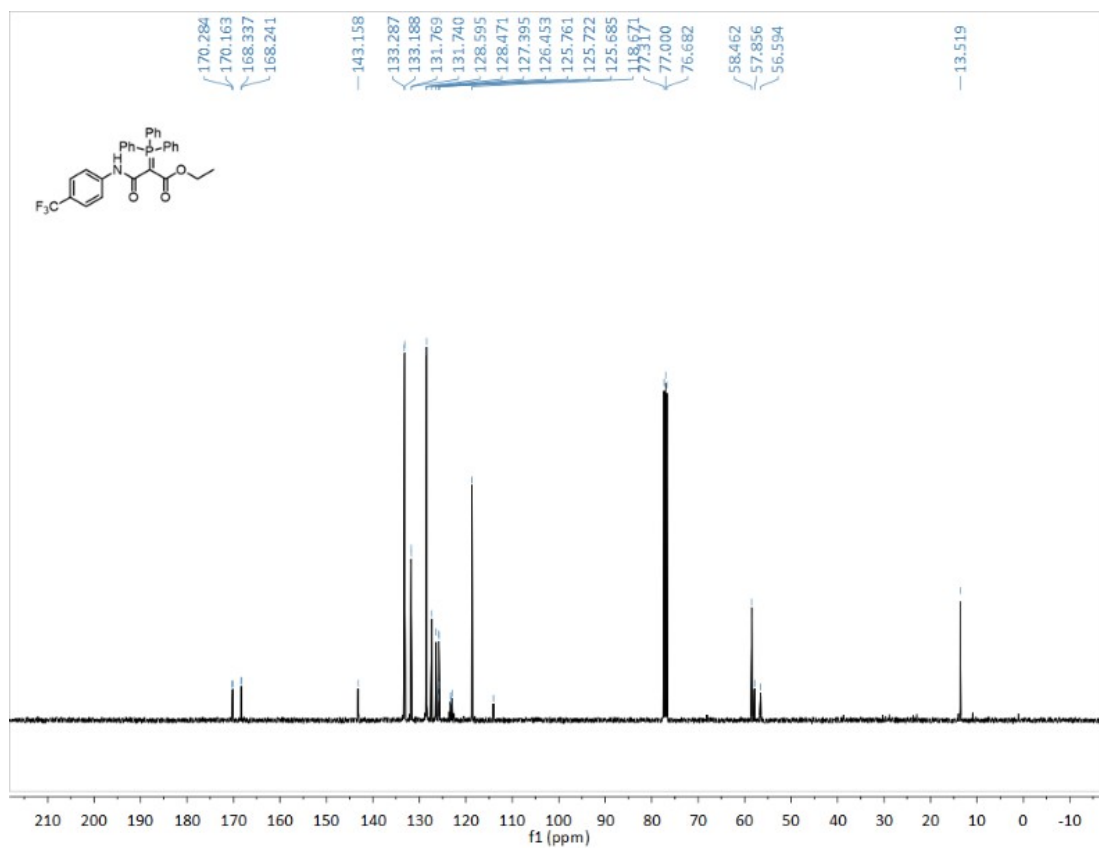

$^{31}\text{P}$  NMR (162 MHz,  $\text{CDCl}_3$ ) of compound **5g**

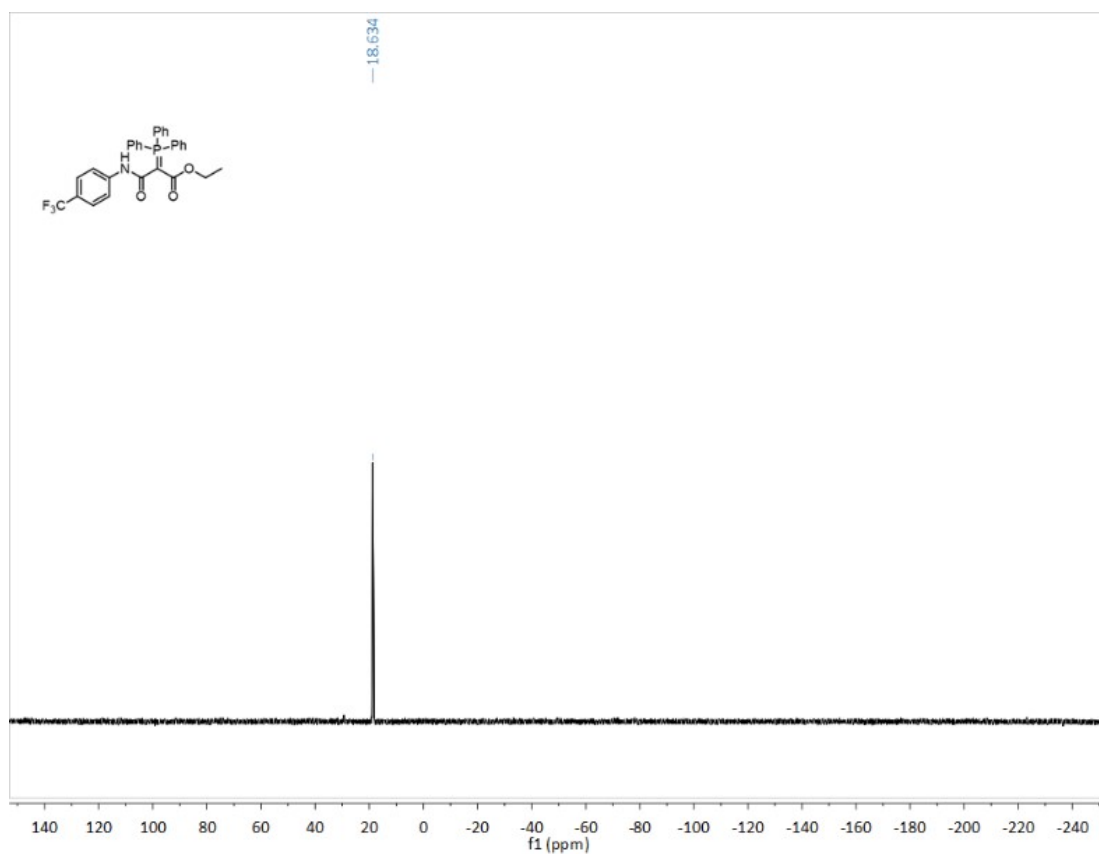

<sup>1</sup>H NMR (400 MHz, CDCl<sub>3</sub>) of compound **5h**

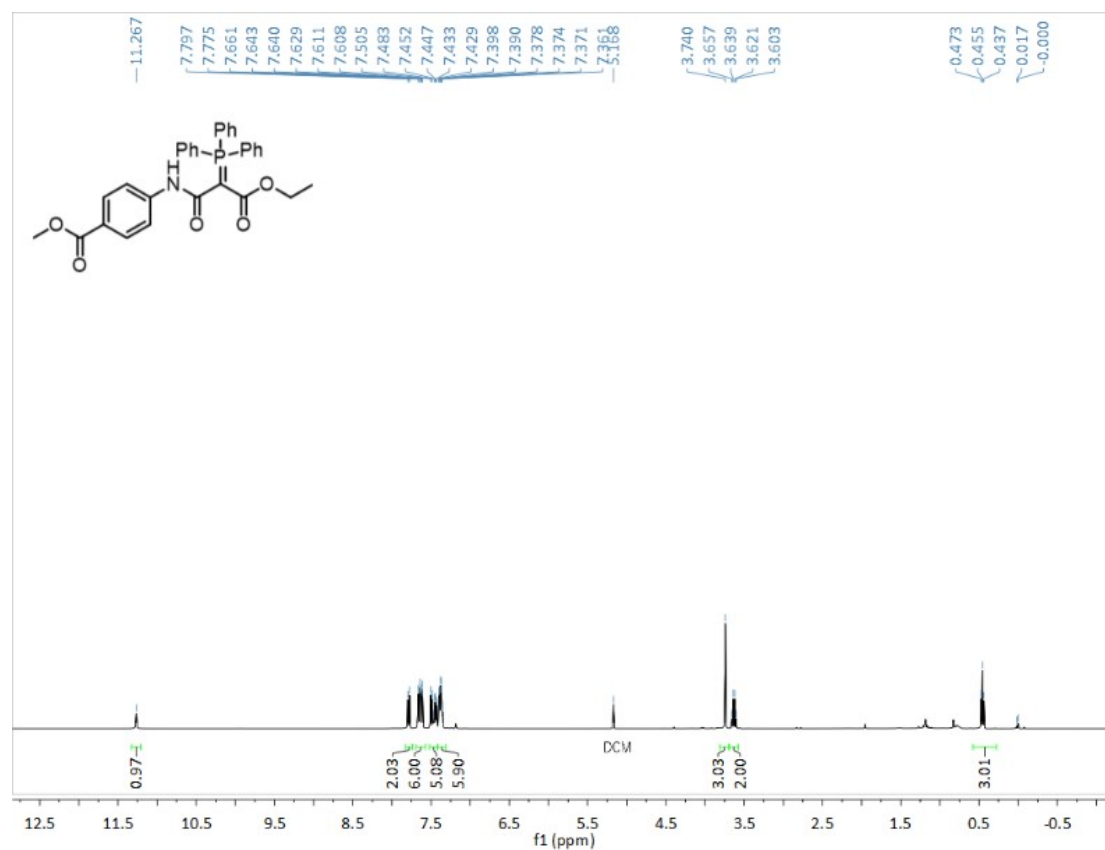

<sup>13</sup>C NMR (101 MHz, CDCl<sub>3</sub>) of compound **5h**

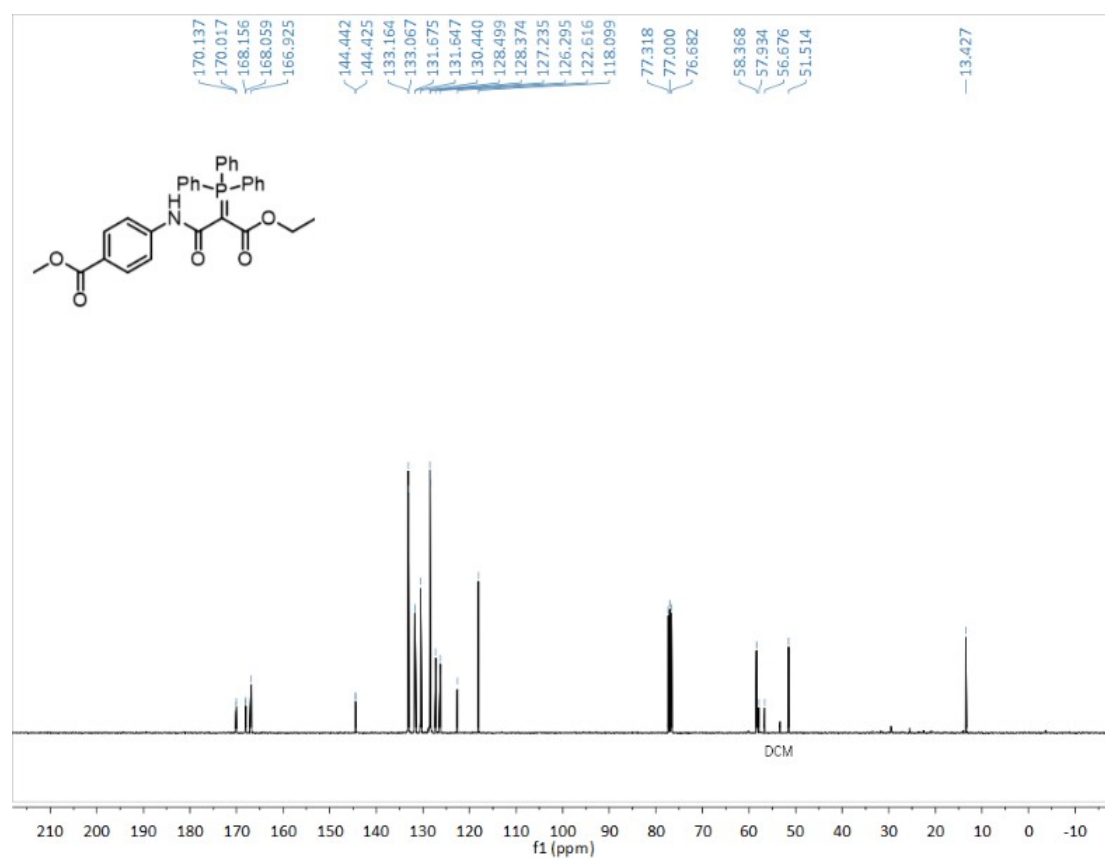

$^{31}\text{P}$  NMR (162 MHz,  $\text{CDCl}_3$ ) of compound **5h**

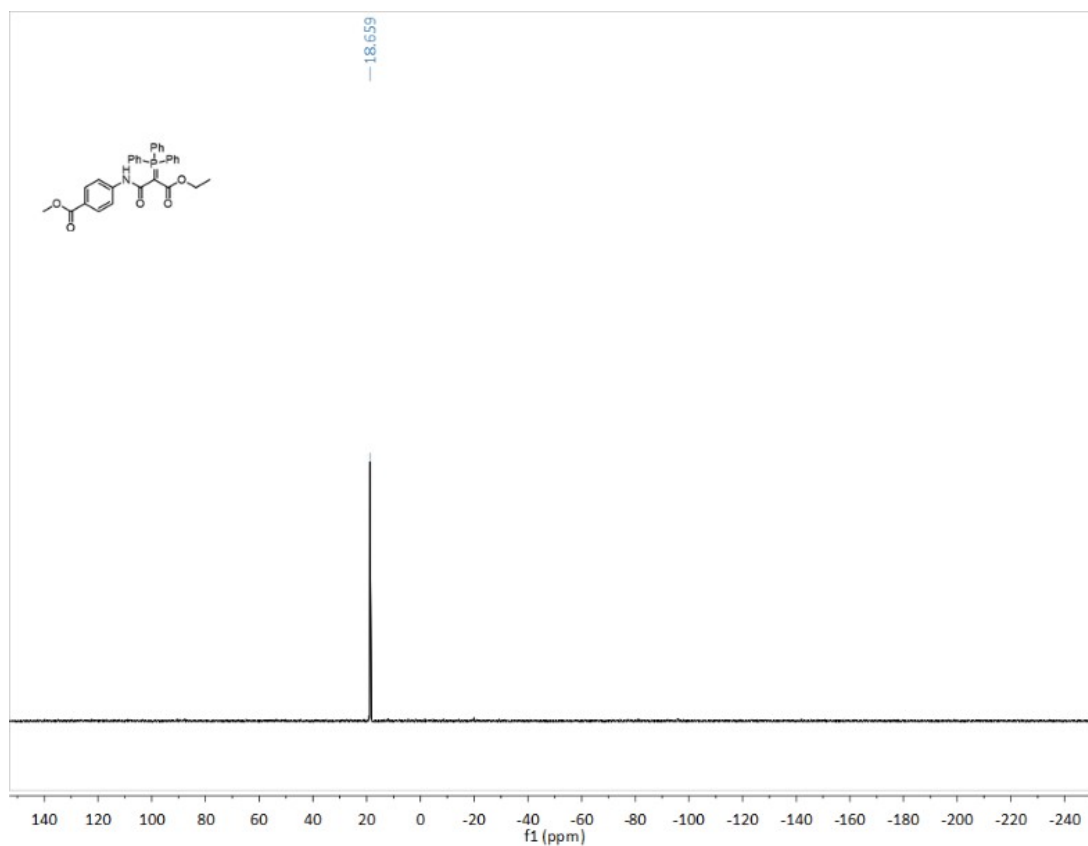

$^1\text{H}$  NMR (400 MHz,  $\text{CDCl}_3$ ) of compound **5i**

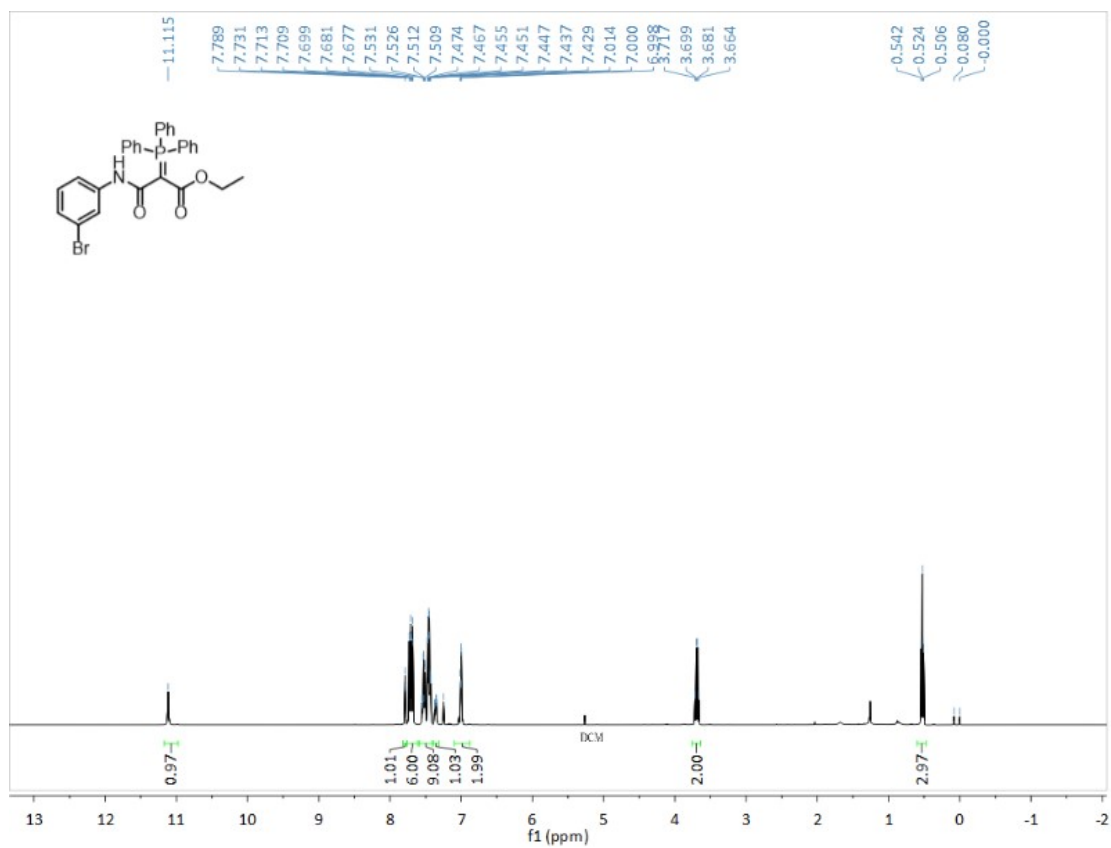

$^{13}\text{C}$  NMR (101 MHz,  $\text{CDCl}_3$ ) of compound **5i**

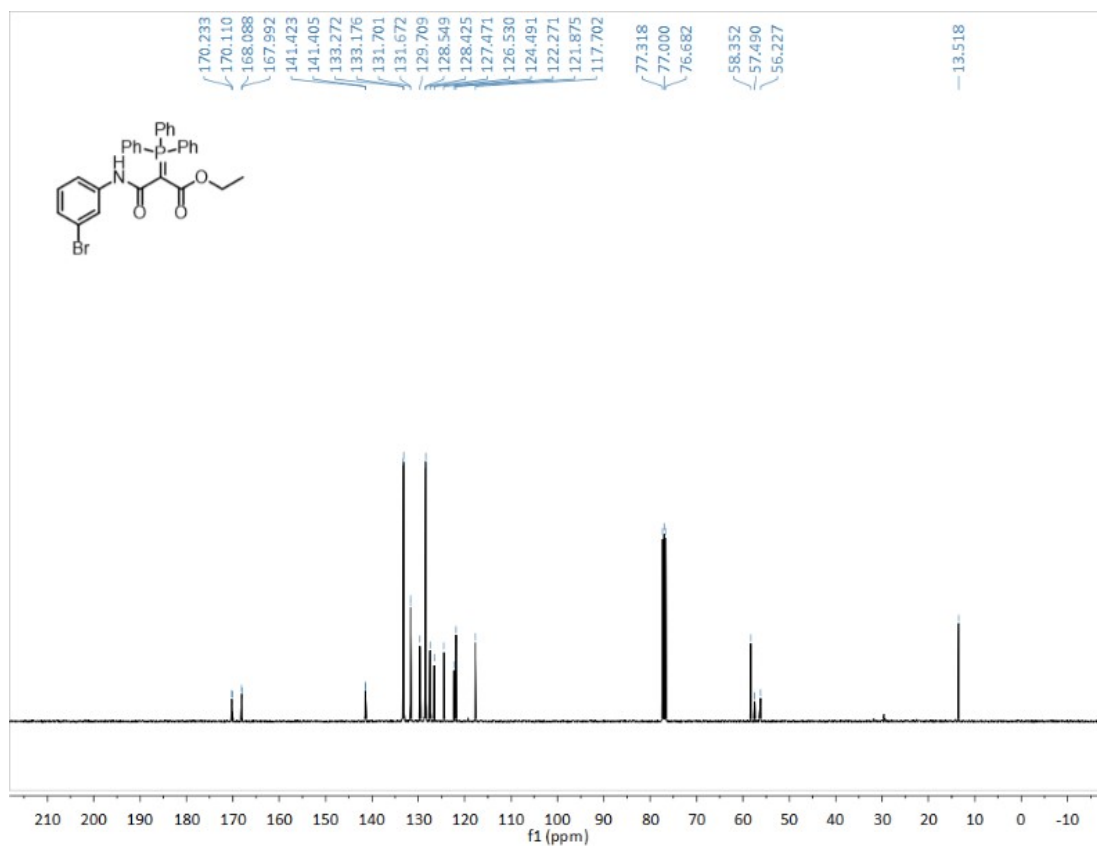

$^{31}\text{P}$  NMR (162 MHz,  $\text{CDCl}_3$ ) of compound **5i**

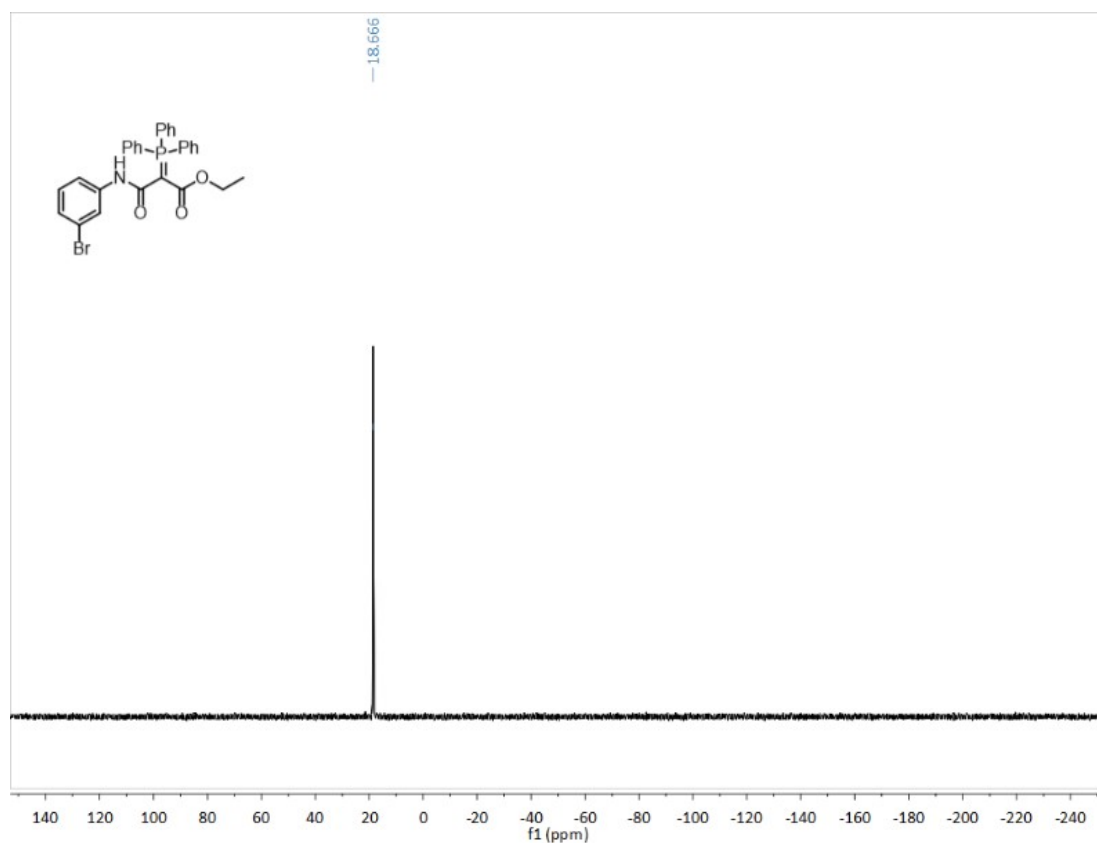



$^1\text{H}$  NMR (400 MHz,  $\text{CDCl}_3$ ) of compound **5j**

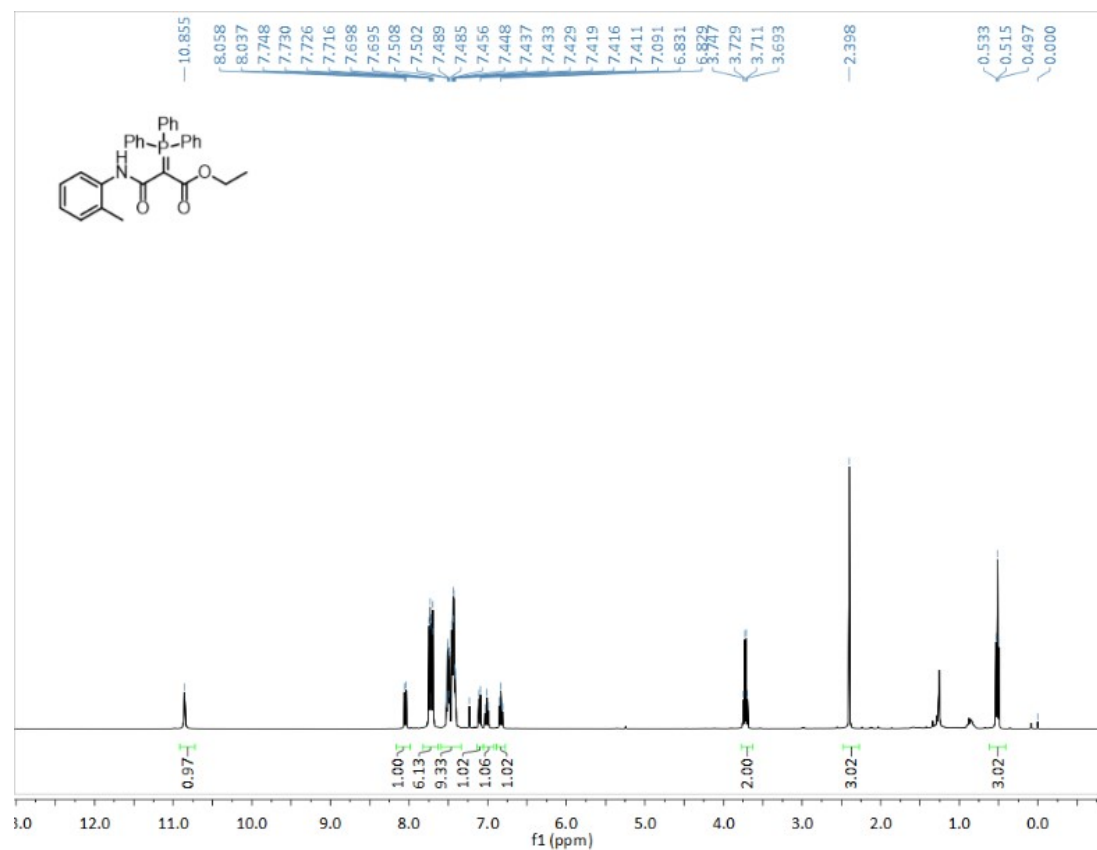

$^{13}\text{C}$  NMR (101 MHz,  $\text{CDCl}_3$ ) of compound **5j**

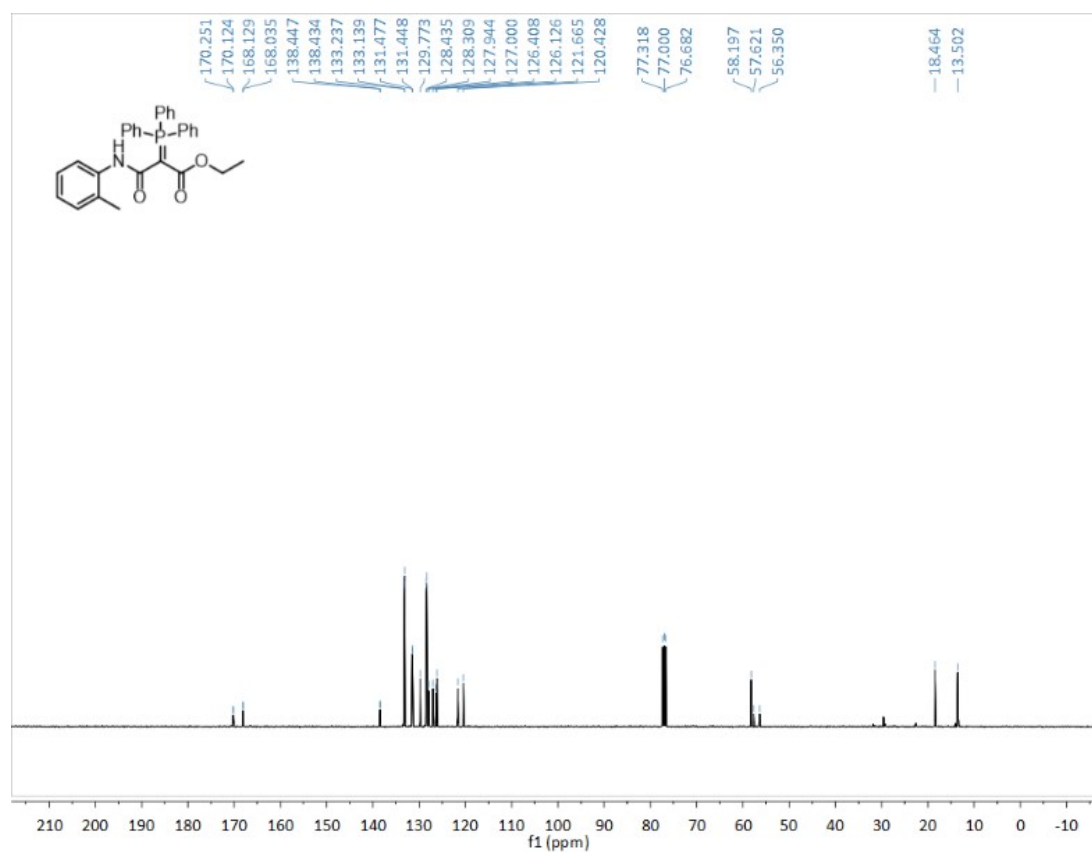

$^{31}\text{P}$  NMR (162 MHz,  $\text{CDCl}_3$ ) of compound **5j**

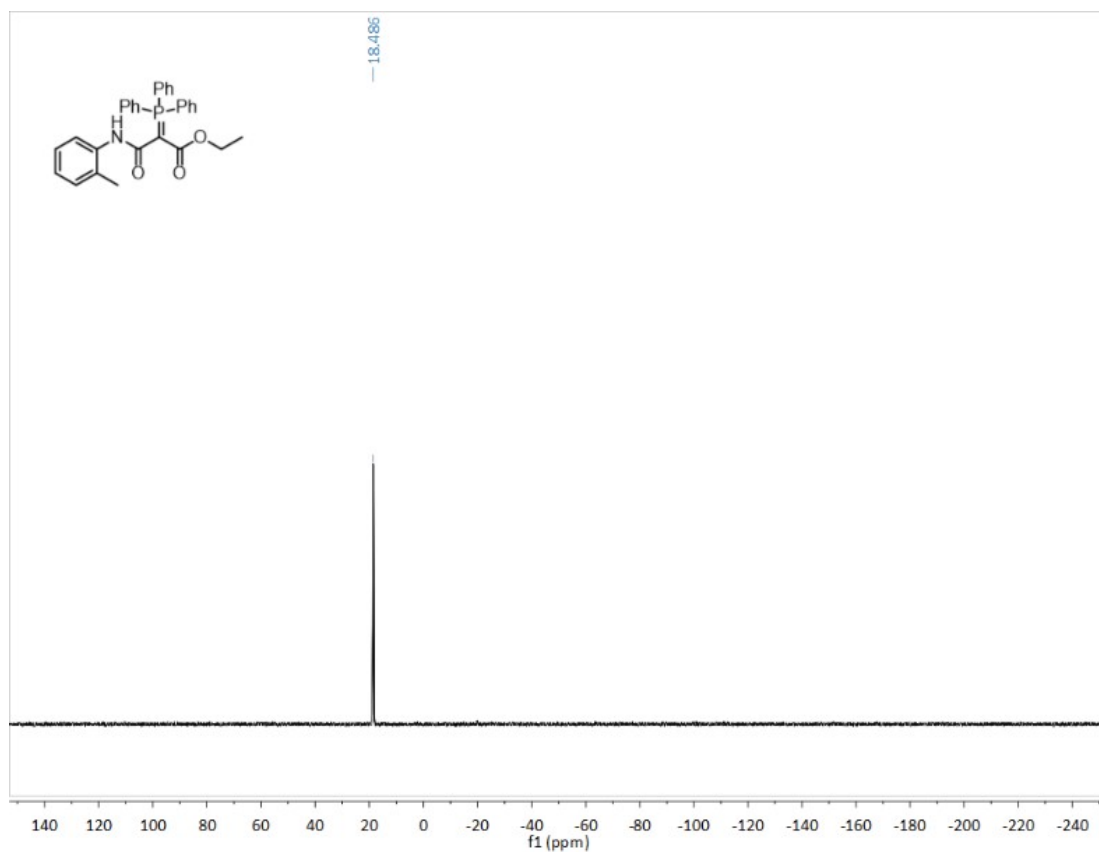

$^1\text{H}$  NMR (400 MHz,  $\text{CDCl}_3$ ) of compound **5k**

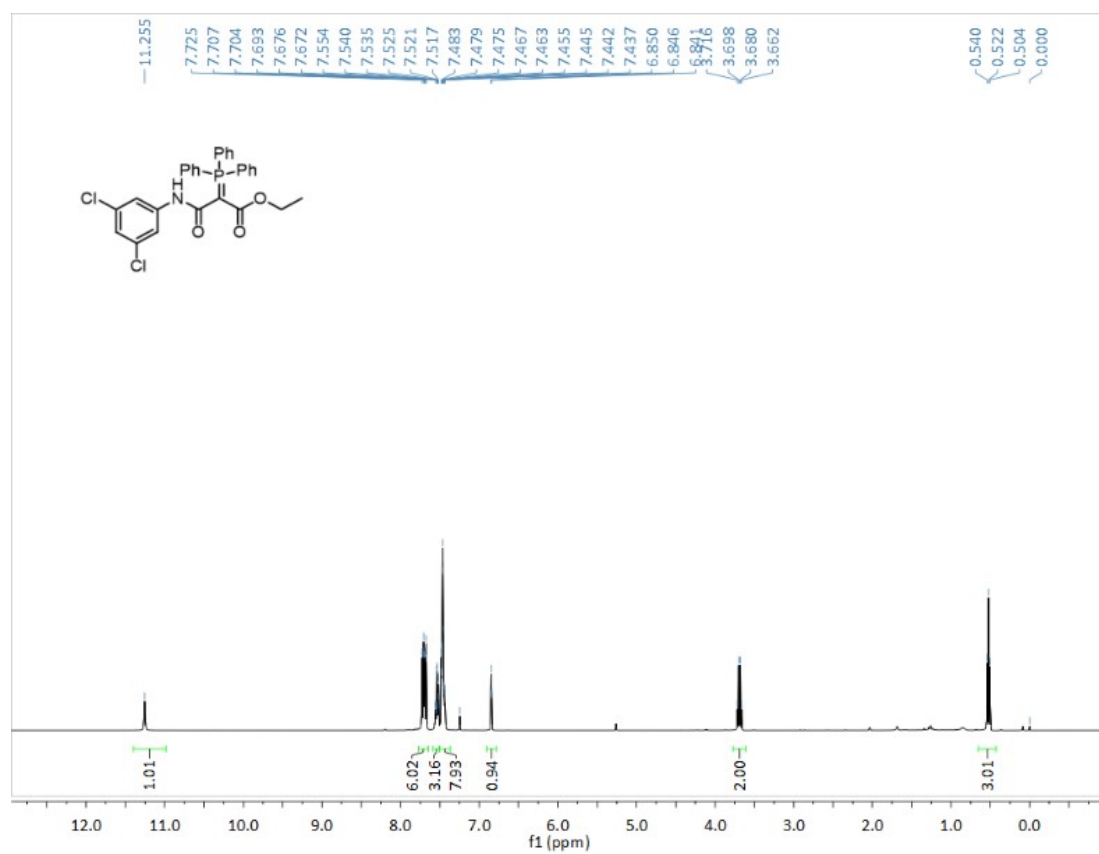

$^{13}\text{C}$  NMR (101 MHz,  $\text{CDCl}_3$ ) of compound **5k**

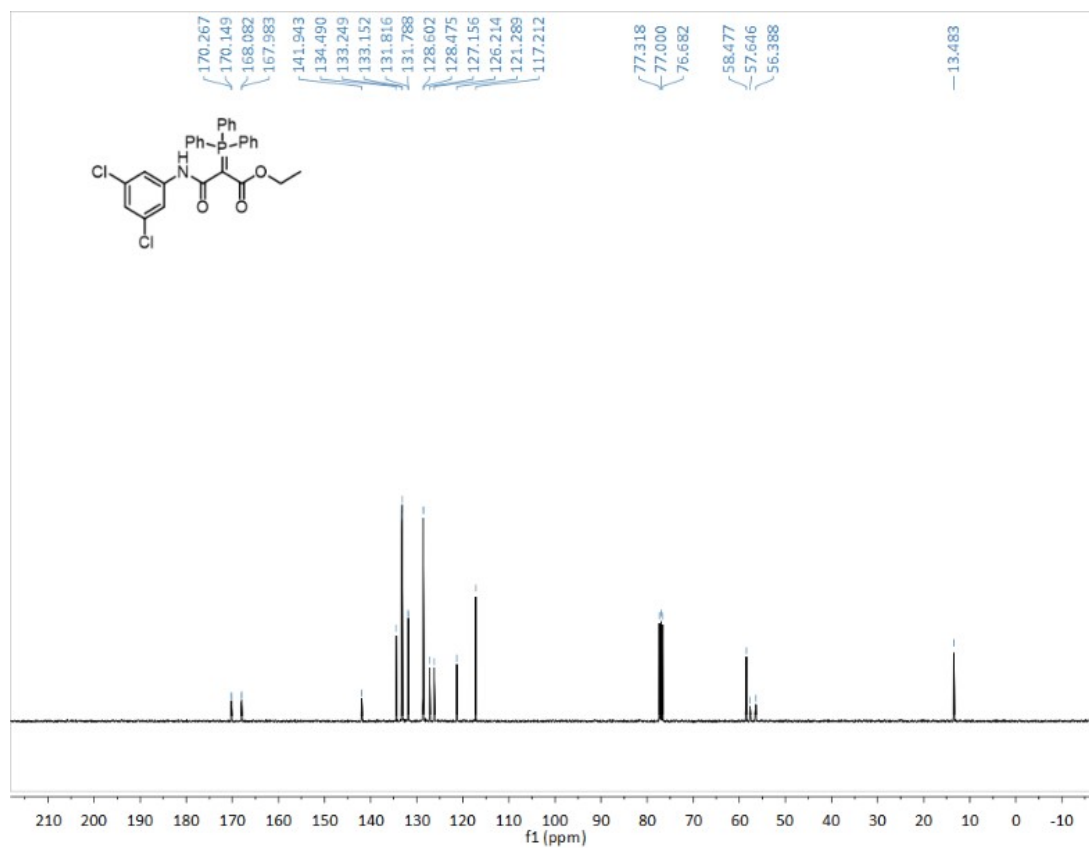

$^{31}\text{P}$  NMR (162 MHz,  $\text{CDCl}_3$ ) of compound **5k**

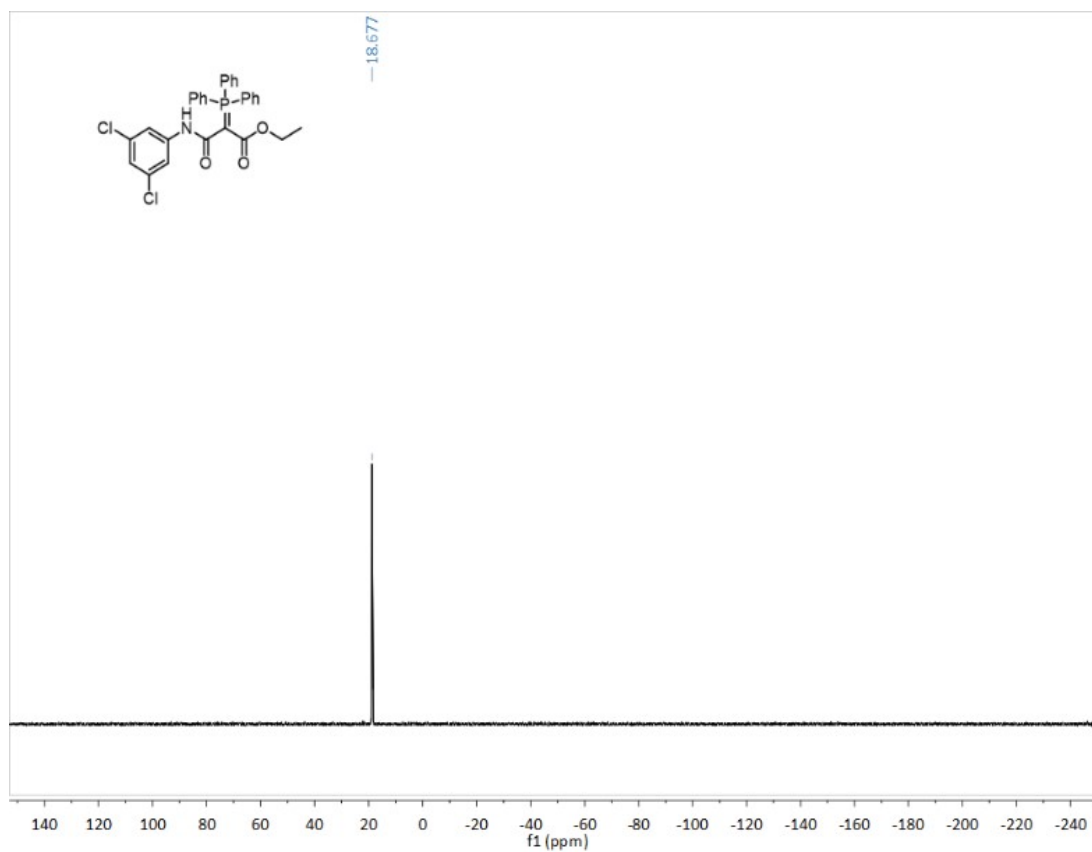

<sup>1</sup>H NMR (400 MHz, CDCl<sub>3</sub>) of compound **51**

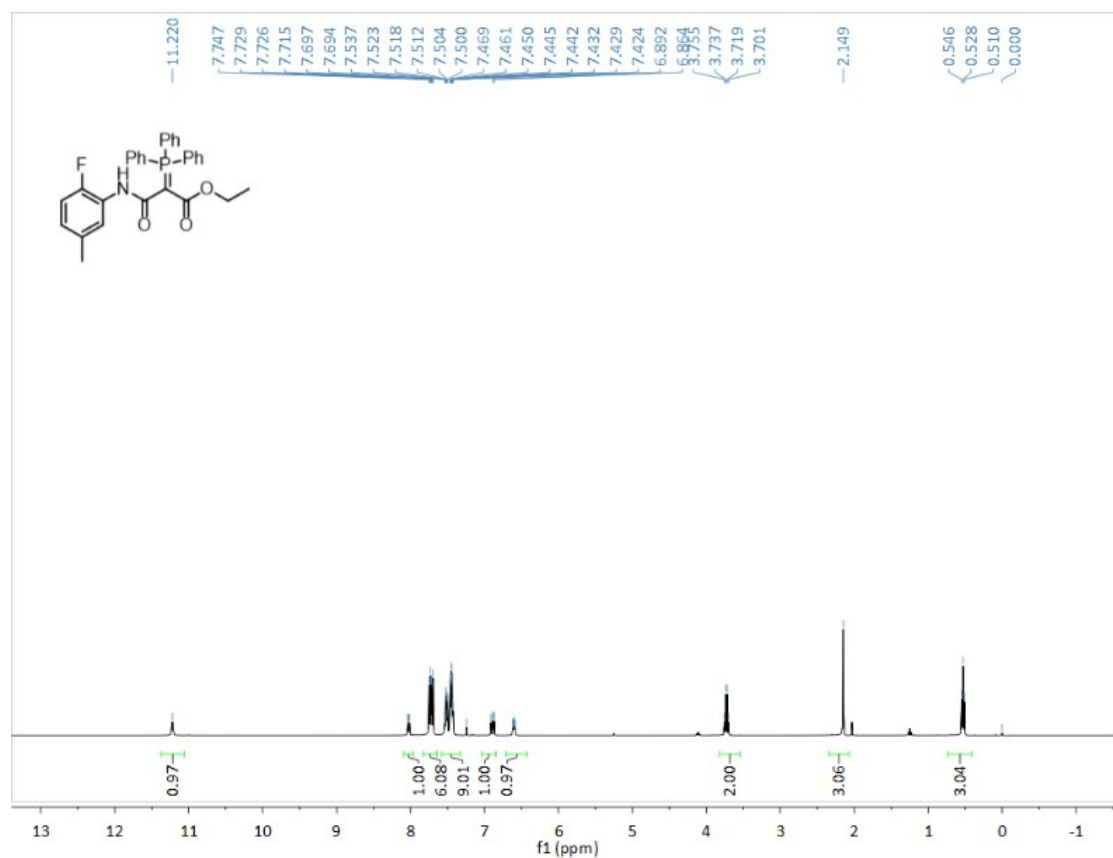

<sup>13</sup>C NMR (101 MHz, CDCl<sub>3</sub>) of compound **51**

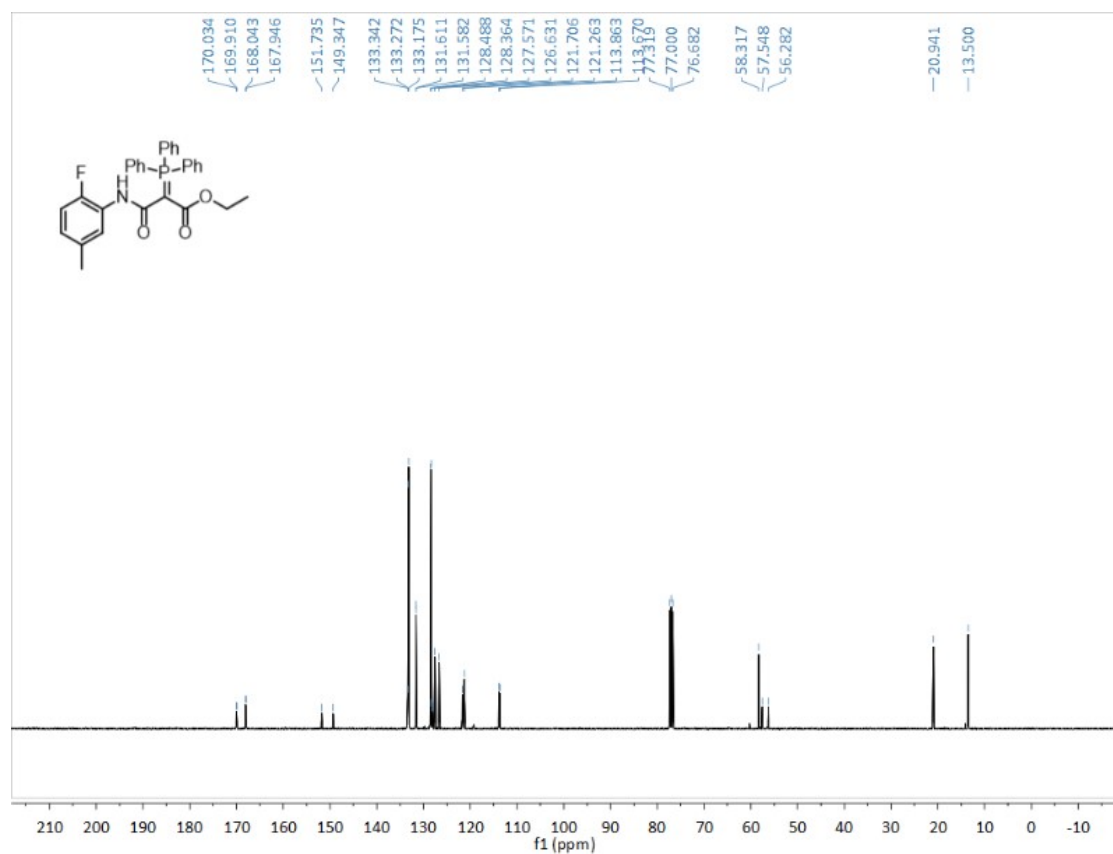

$^{31}\text{P}$  NMR (162 MHz,  $\text{CDCl}_3$ ) of compound **5l**

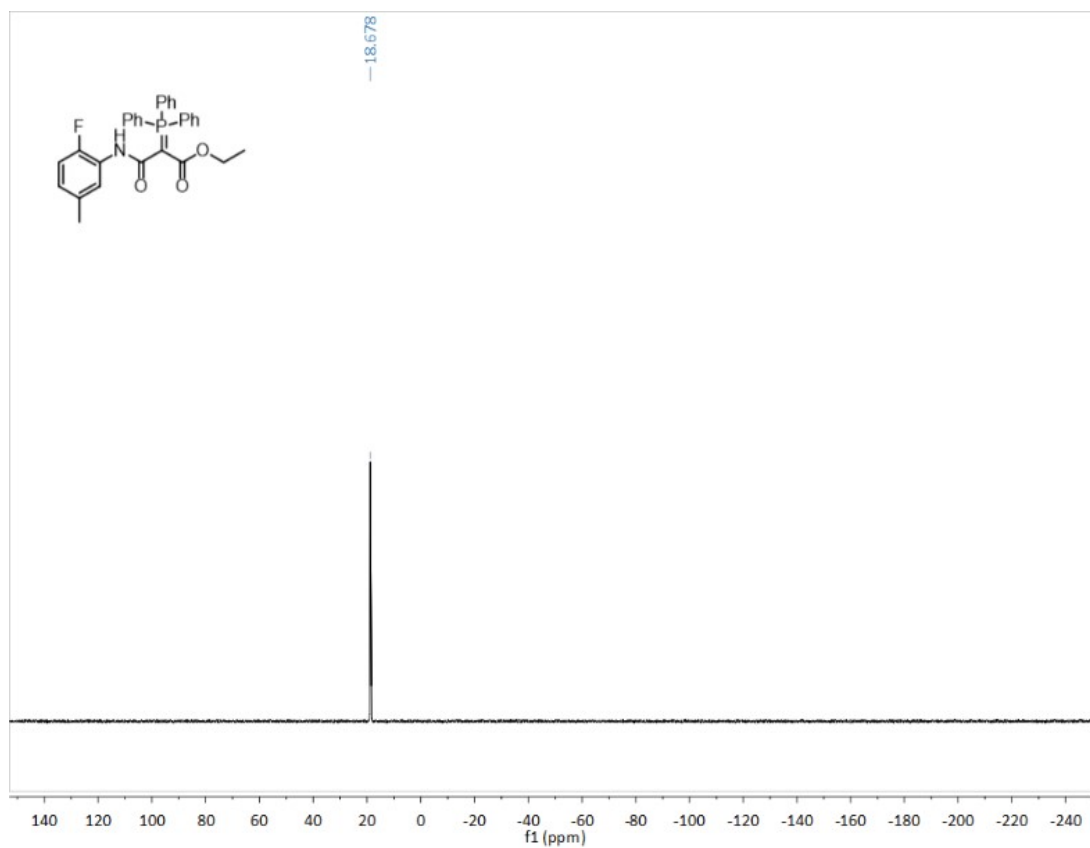

$^1\text{H}$  NMR (400 MHz,  $\text{CDCl}_3$ ) of compound **5m**

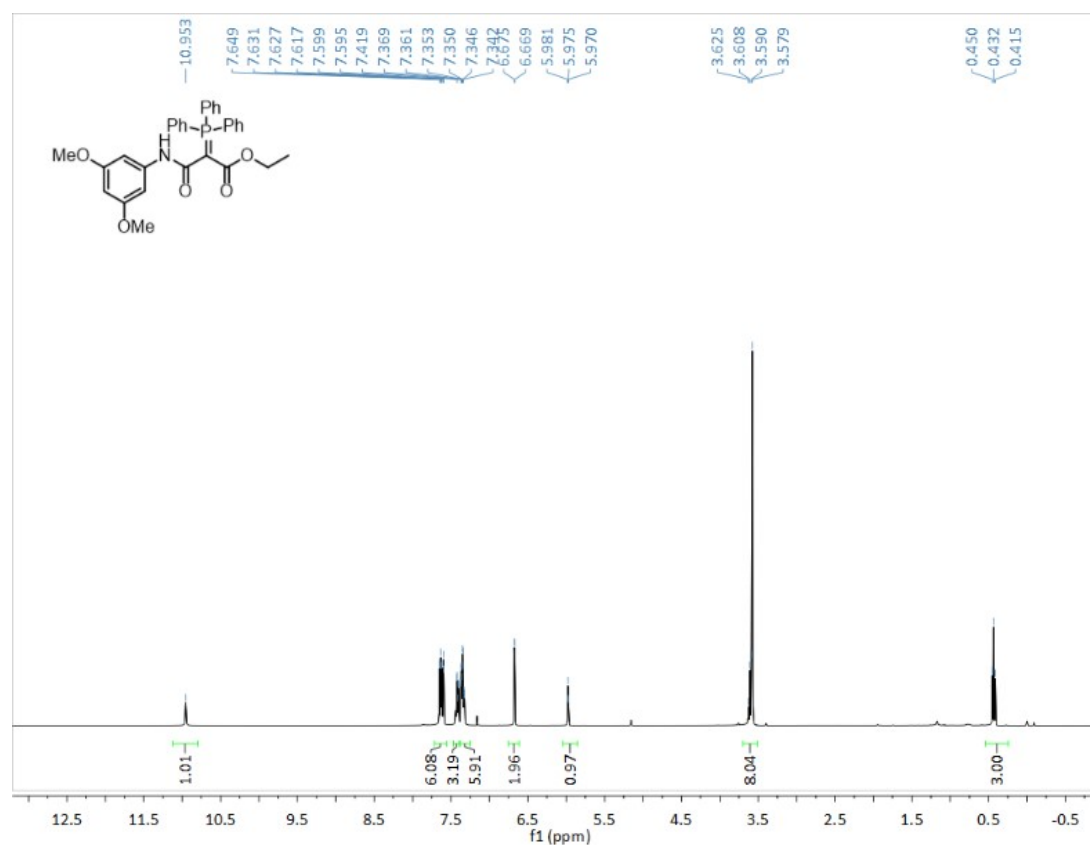

$^{13}\text{C}$  NMR (101 MHz,  $\text{CDCl}_3$ ) of compound **5m**

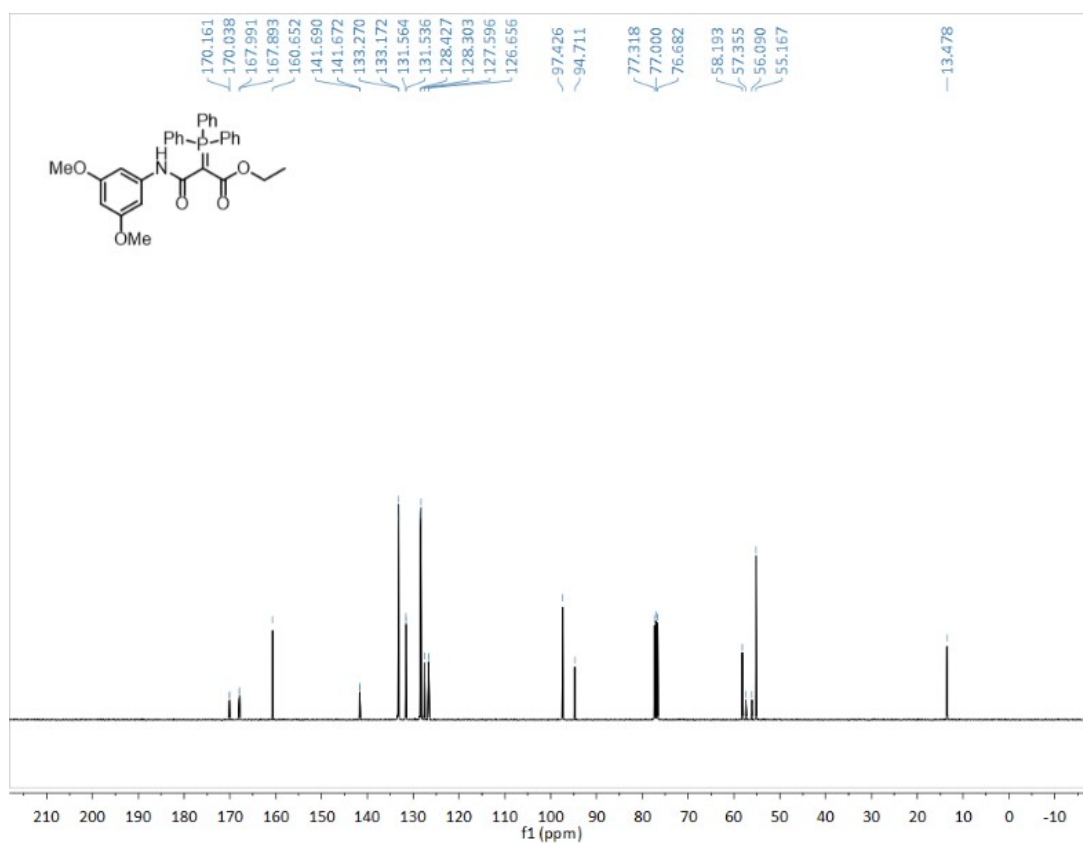

$^{31}\text{P}$  NMR (162 MHz,  $\text{CDCl}_3$ ) of compound **5m**

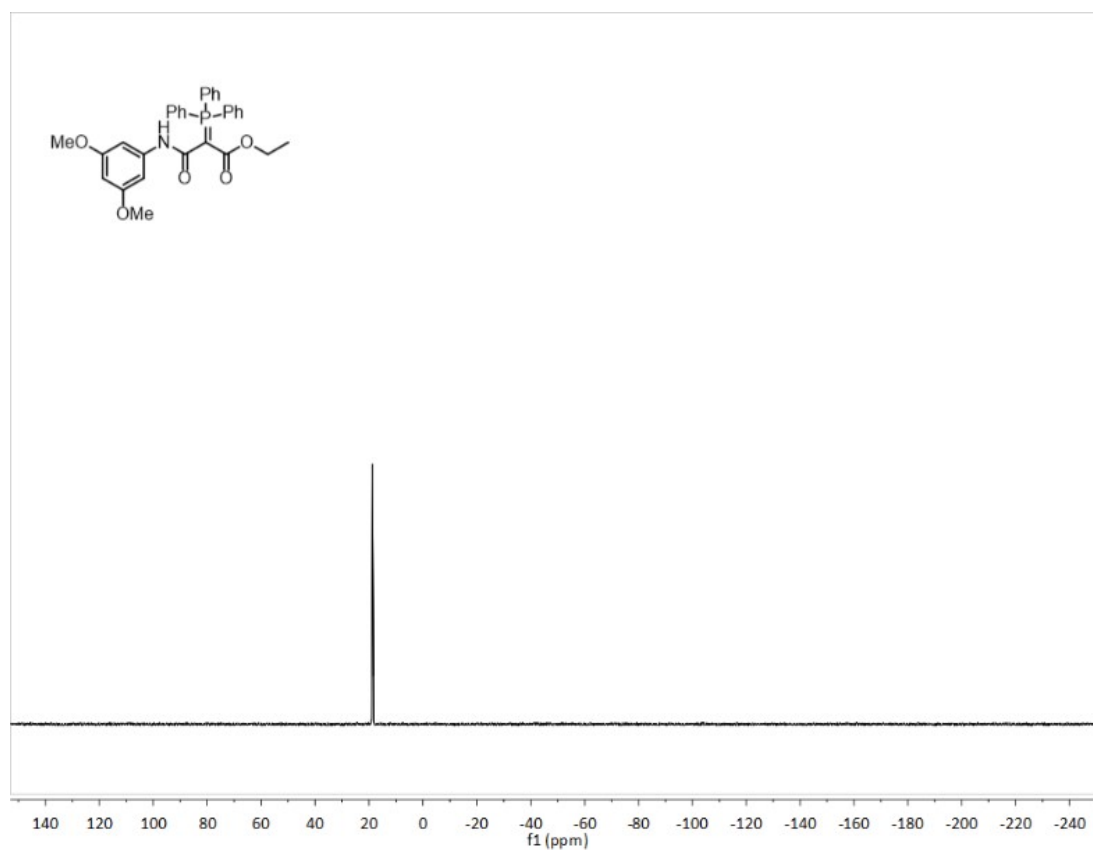

$^1\text{H}$  NMR (400 MHz,  $\text{CDCl}_3$ ) of compound **5n**

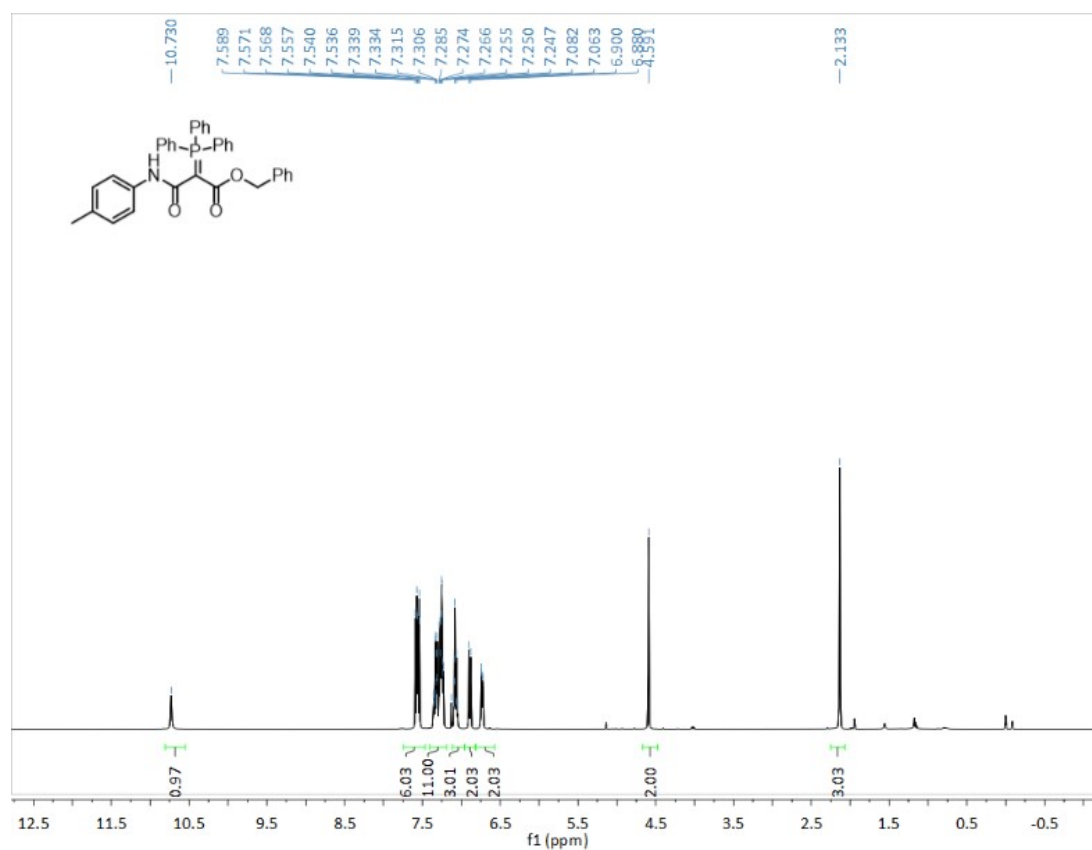

$^{13}\text{C}$  NMR (101 MHz,  $\text{CDCl}_3$ ) of compound **5n**

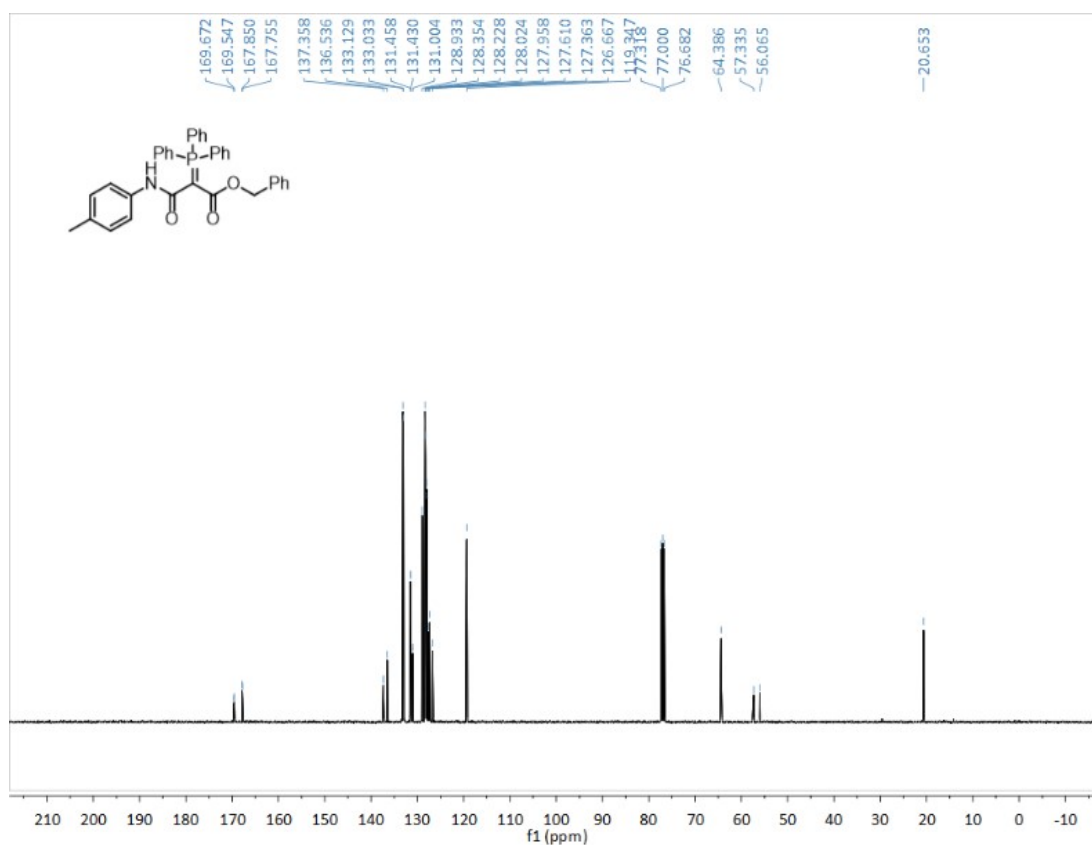

$^{31}\text{P}$  NMR (162 MHz,  $\text{CDCl}_3$ ) of compound **5n**

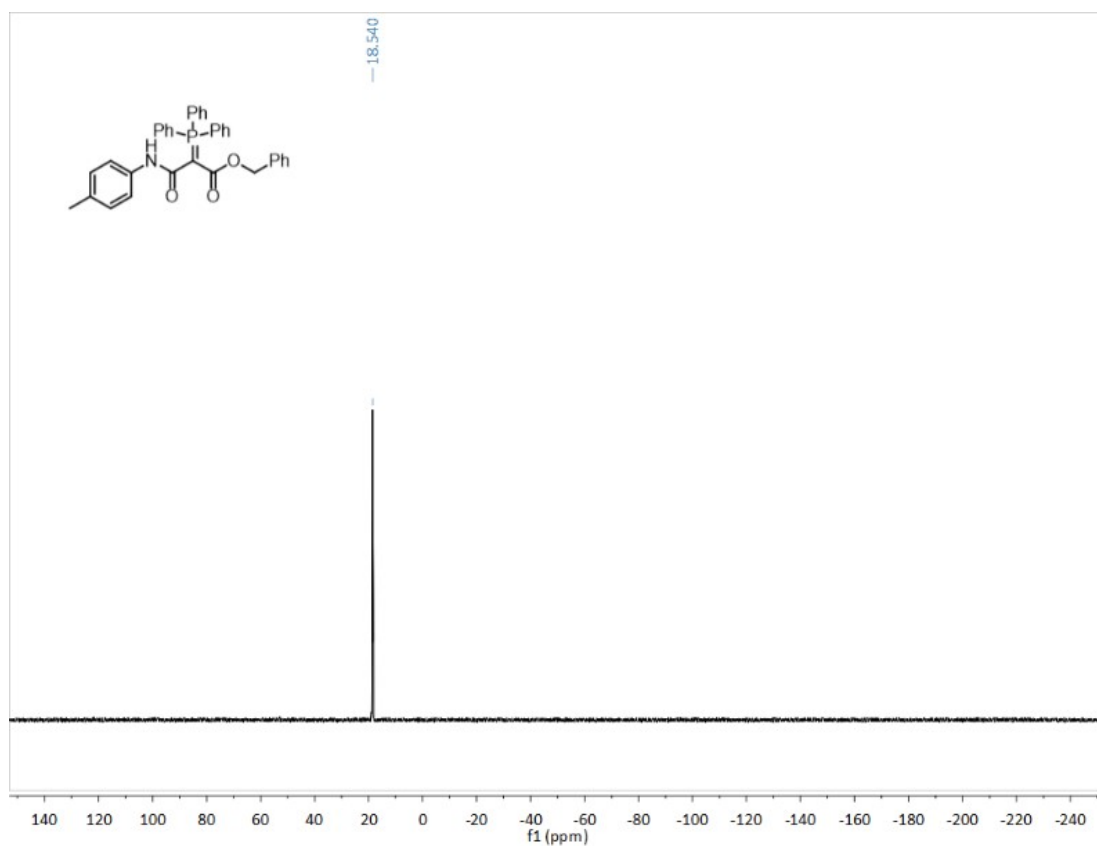

$^1\text{H}$  NMR (400 MHz,  $\text{CDCl}_3$ ) of compound **5o**

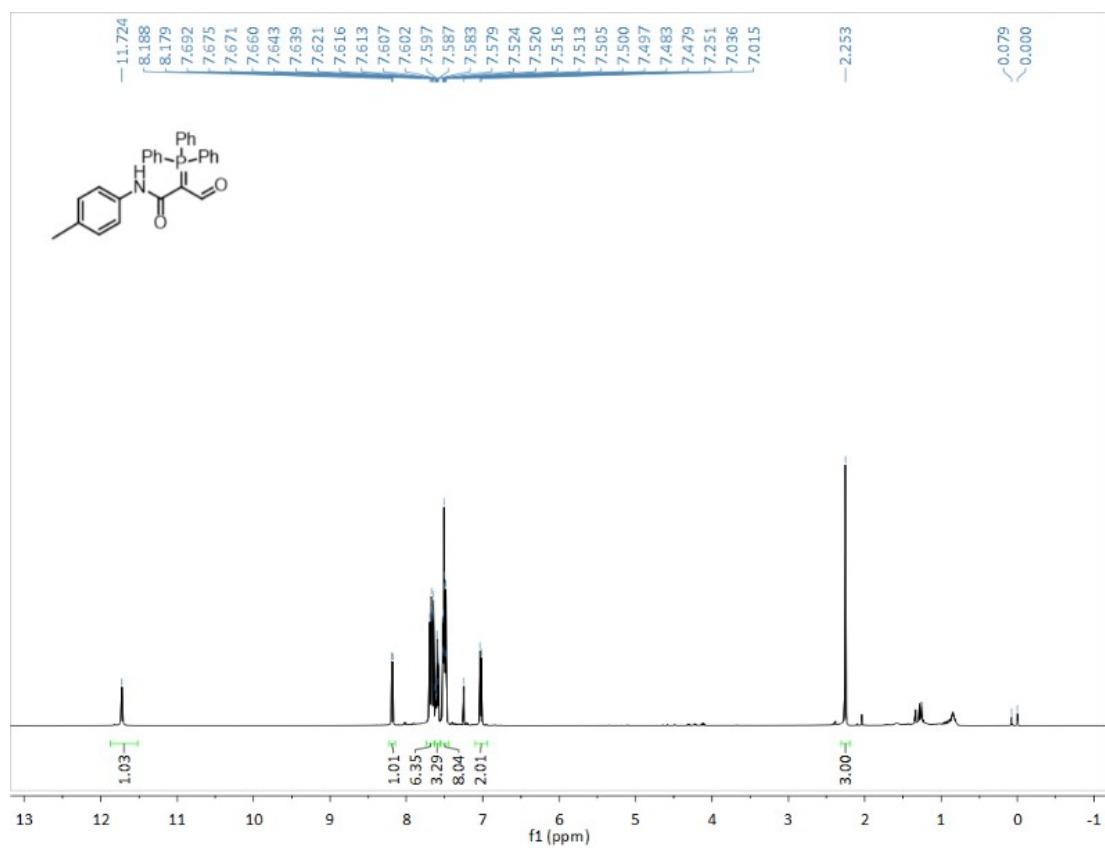



$^{13}\text{C}$  NMR (101 MHz,  $\text{CDCl}_3$ ) of compound **5o**

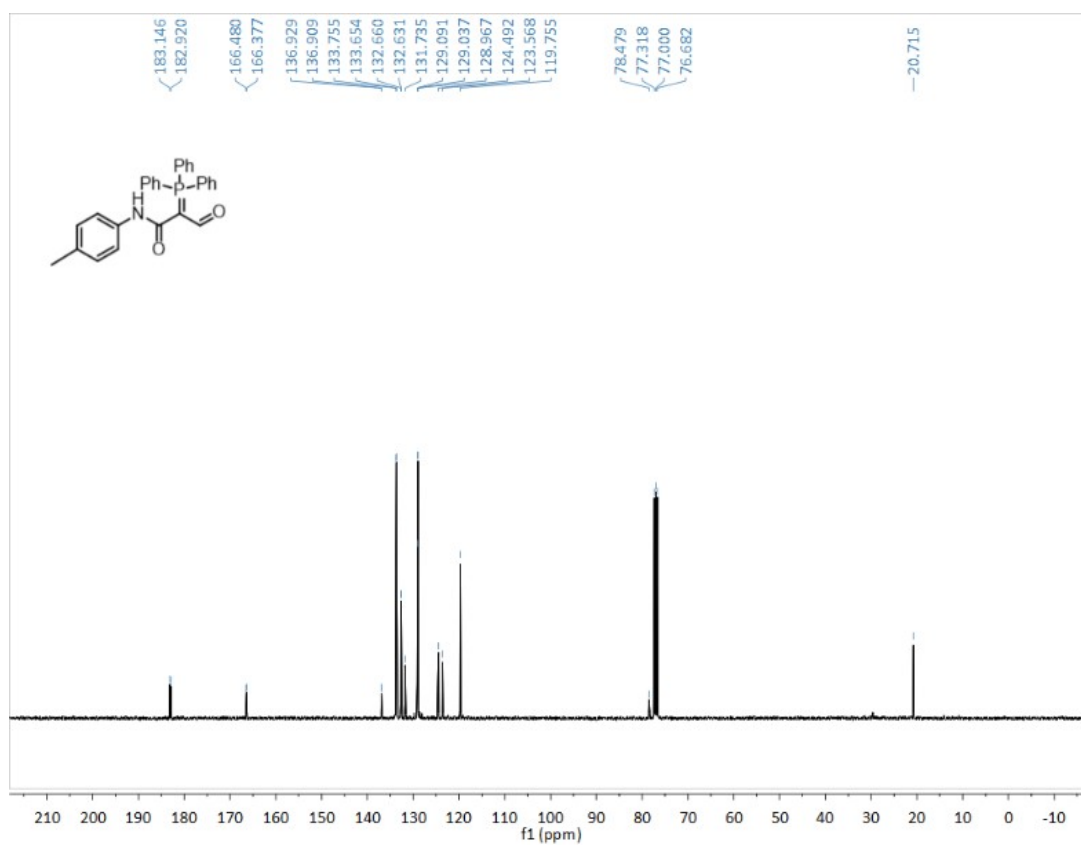

$^{31}\text{P}$  NMR (162 MHz,  $\text{CDCl}_3$ ) of compound **5o**

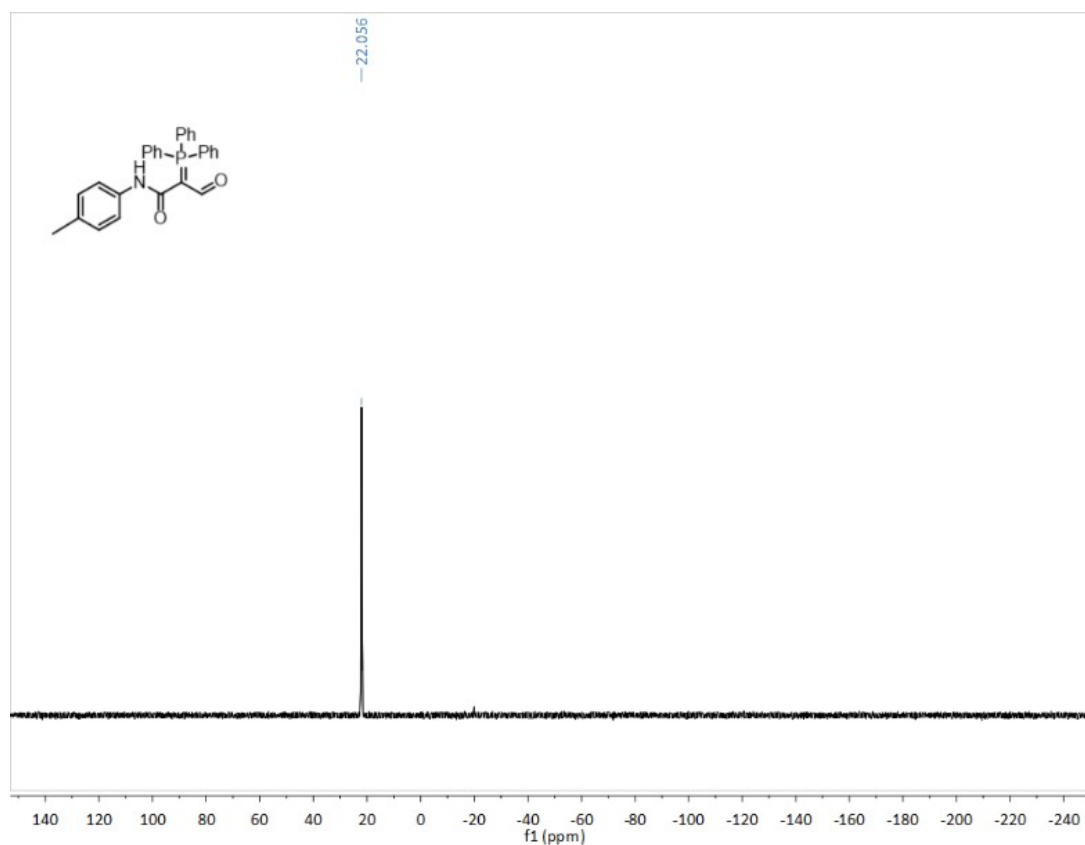

<sup>1</sup>H NMR (400 MHz, CDCl<sub>3</sub>) of compound **5p**

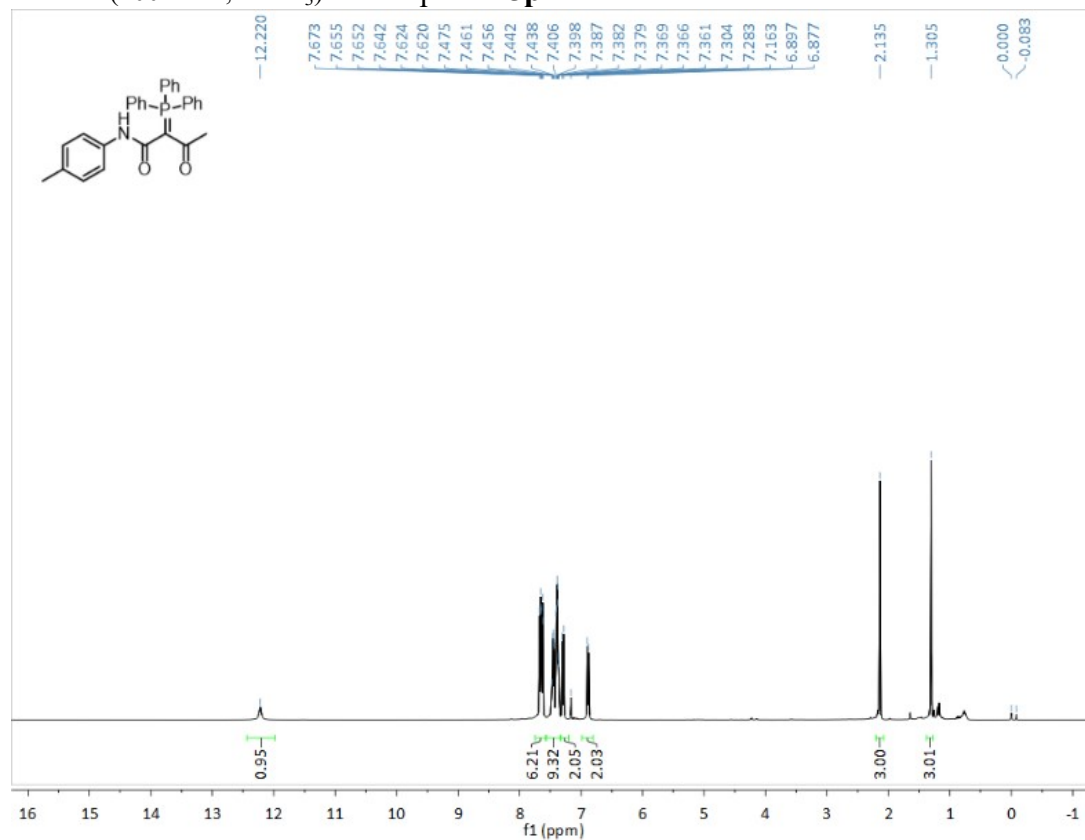

<sup>13</sup>C NMR (101 MHz, CDCl<sub>3</sub>) of compound **5p**

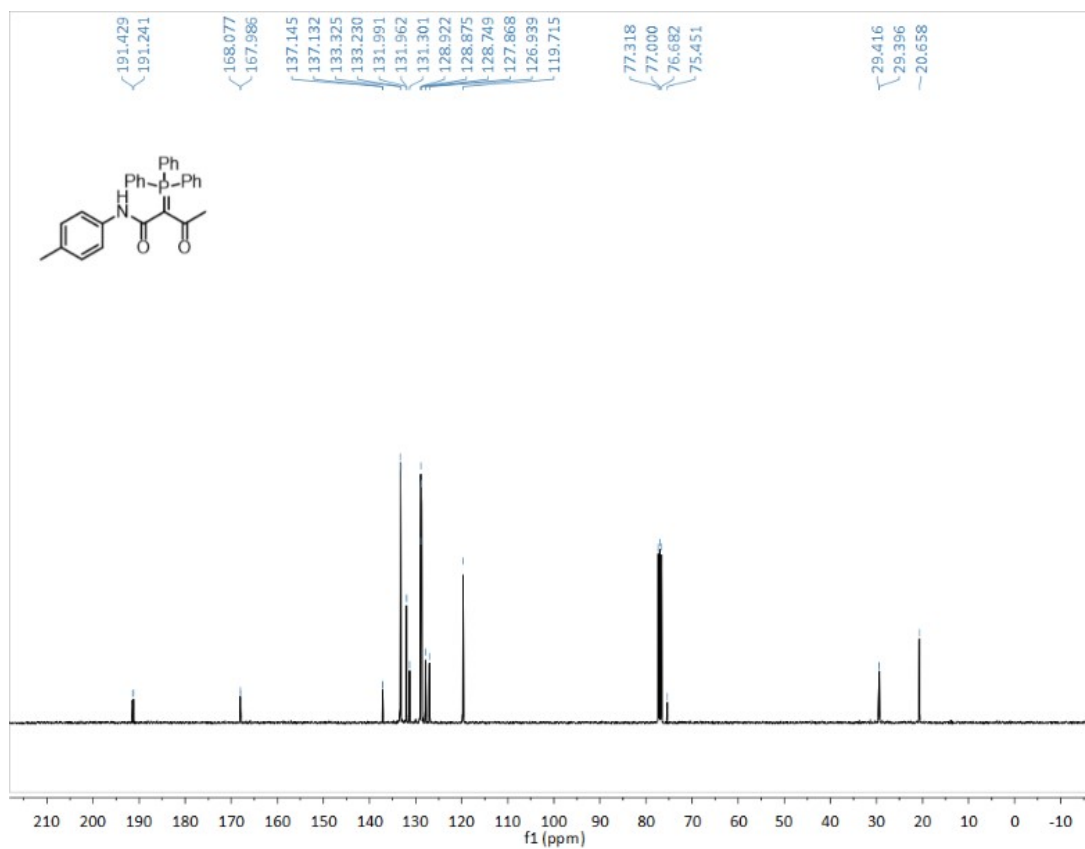

$^{31}\text{P}$  NMR (162 MHz,  $\text{CDCl}_3$ ) of compound **5p**

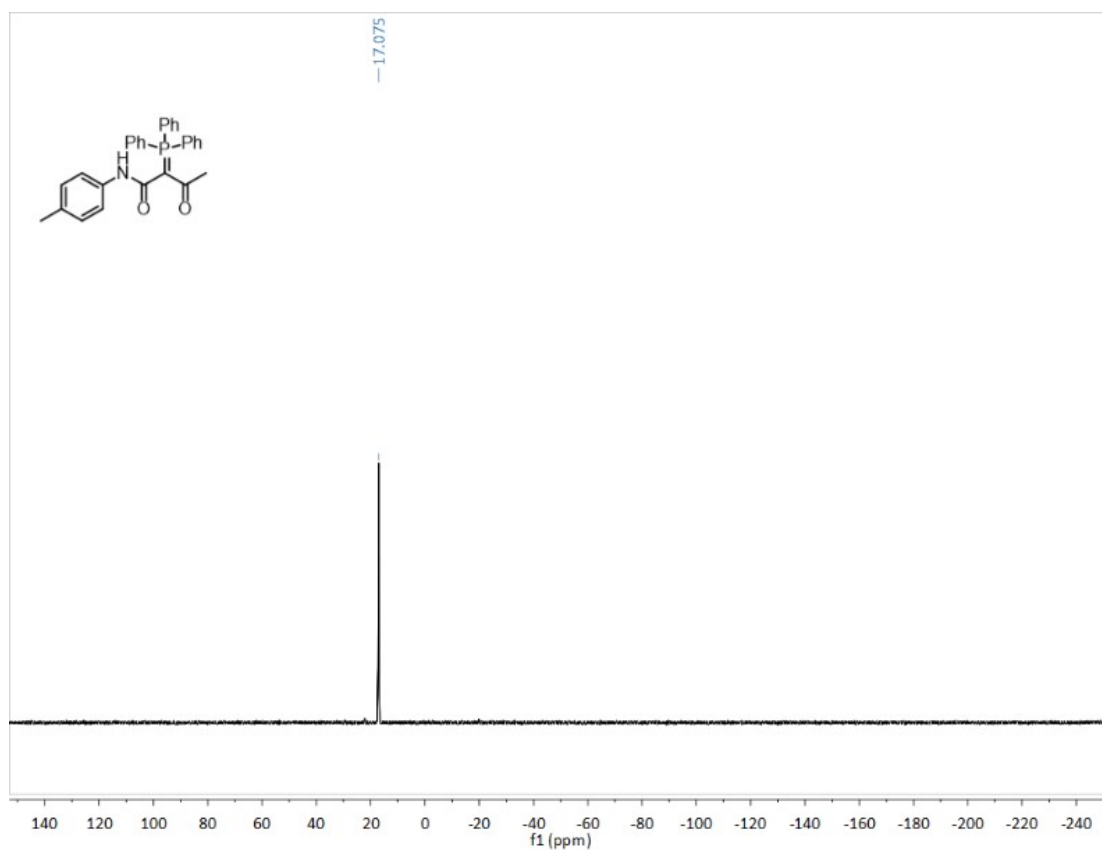

$^1\text{H}$  NMR (400 MHz,  $\text{CDCl}_3$ ) of compound **5q**

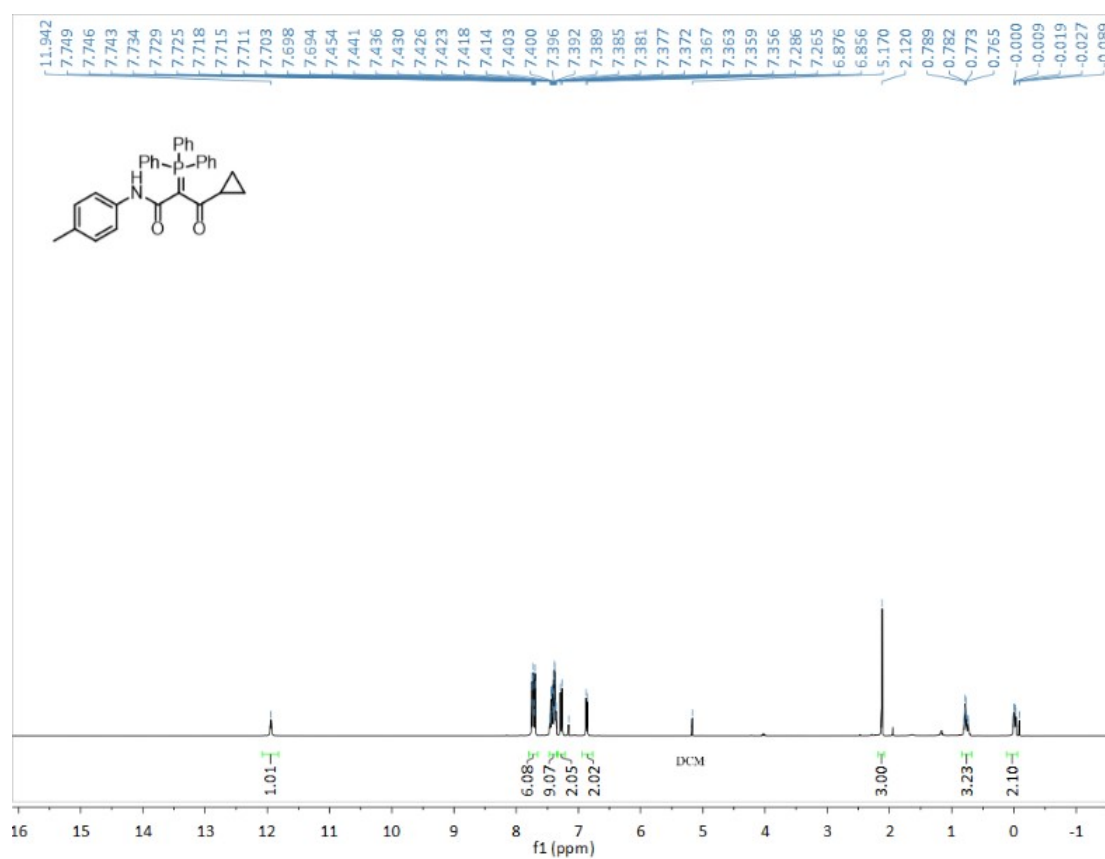

$^{13}\text{C}$  NMR (101 MHz,  $\text{CDCl}_3$ ) of compound **5q**

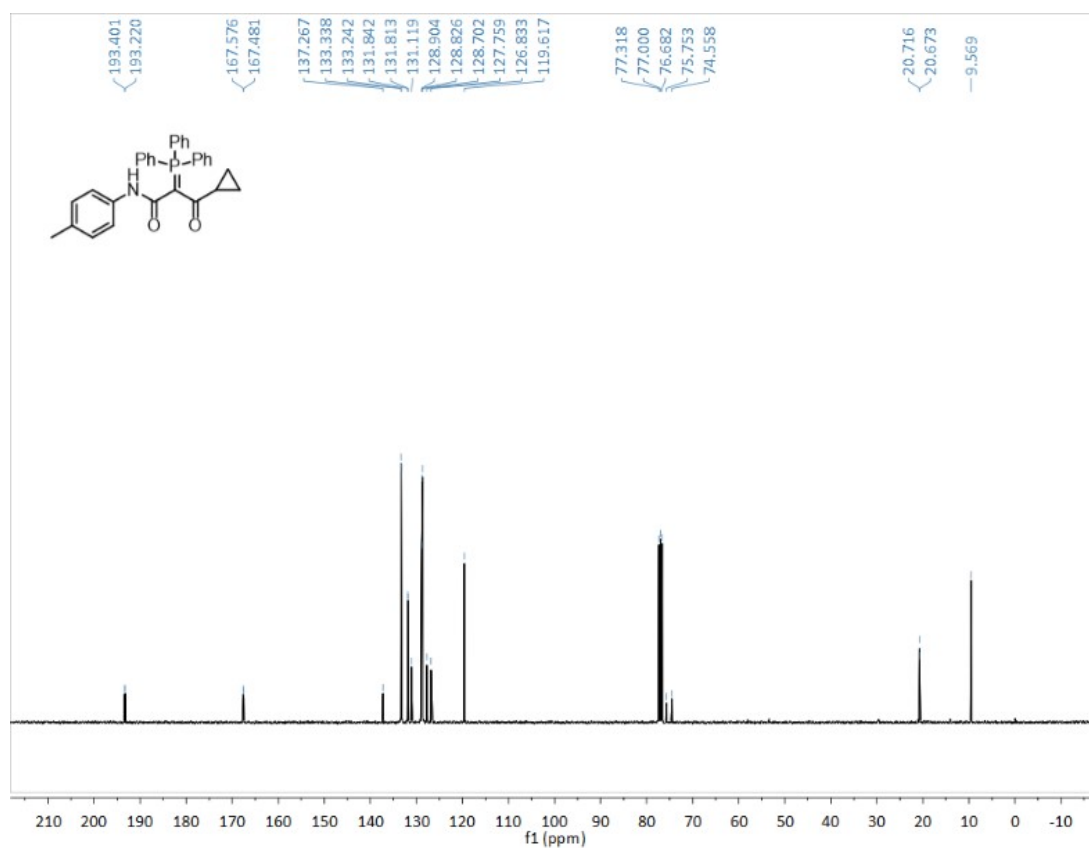

$^{31}\text{P}$  NMR (162 MHz,  $\text{CDCl}_3$ ) of compound **5q**

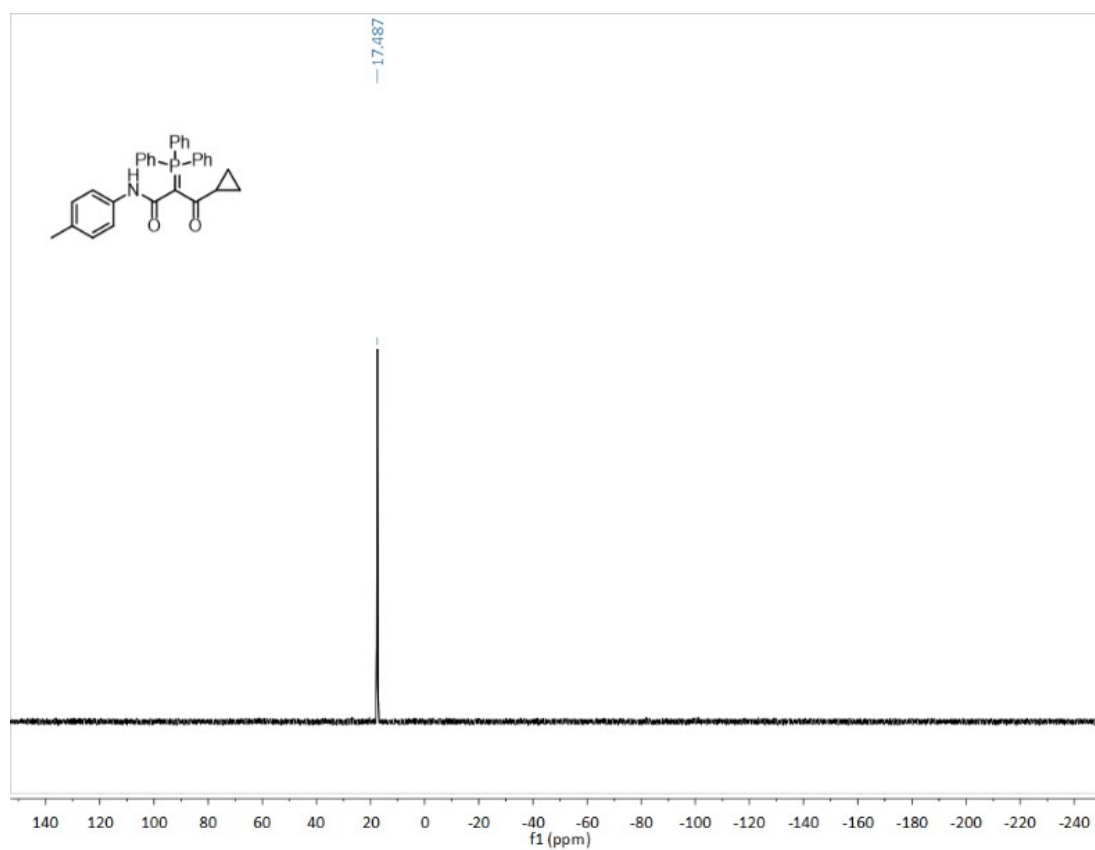

<sup>1</sup>H NMR (400 MHz, CDCl<sub>3</sub>) of compound **5r**

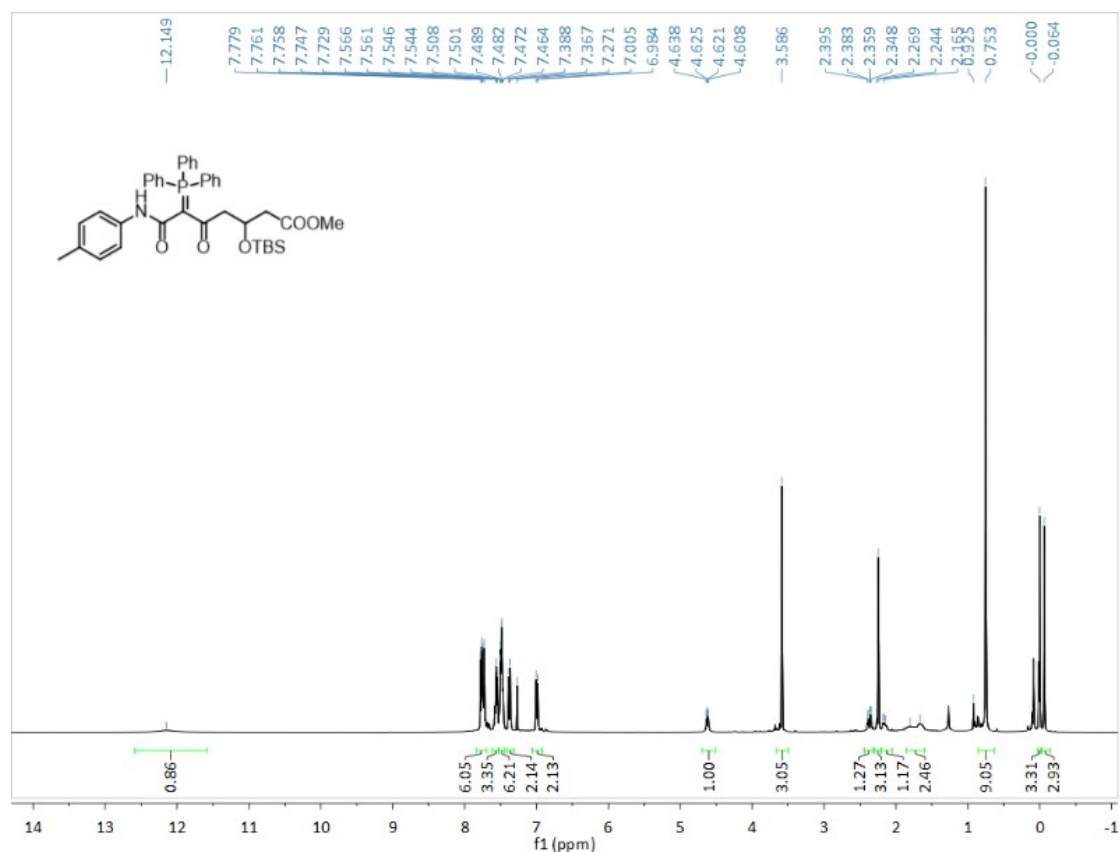

<sup>13</sup>C NMR (101 MHz, CDCl<sub>3</sub>) of compound **5r**

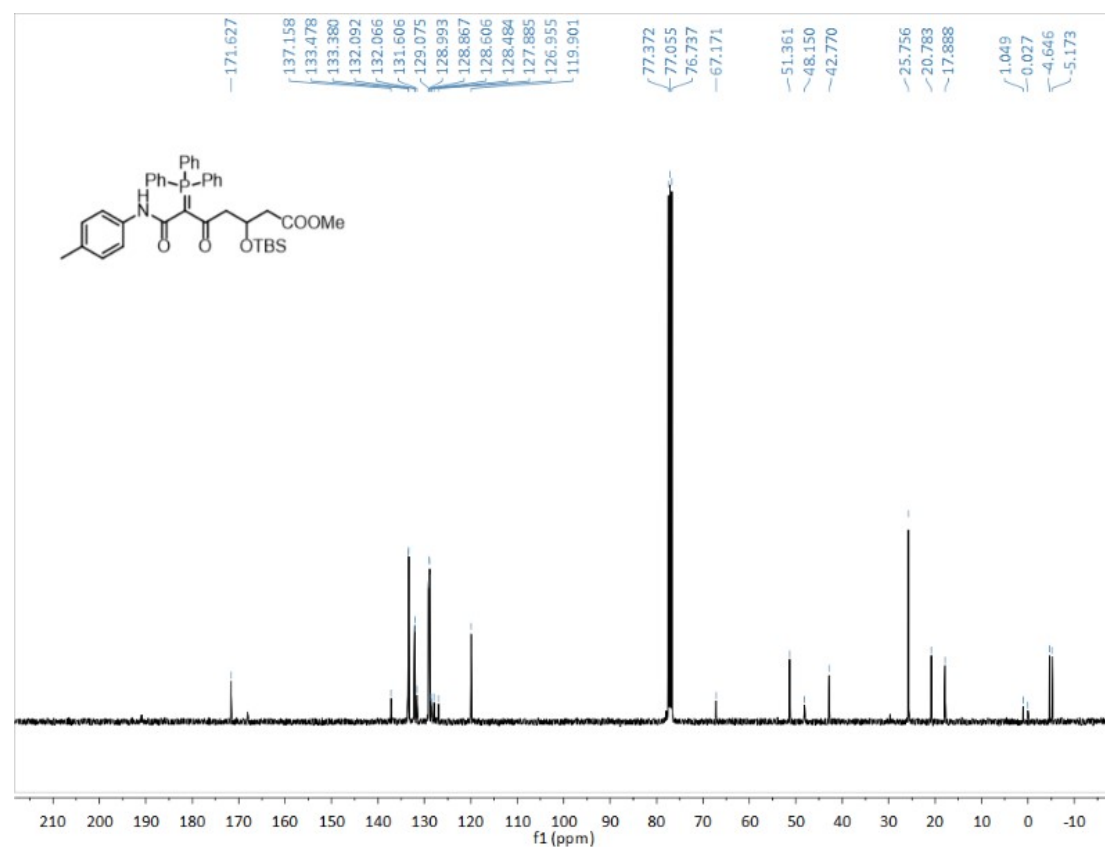

$^{31}\text{P}$  NMR (162 MHz,  $\text{CDCl}_3$ ) of compound **5r**

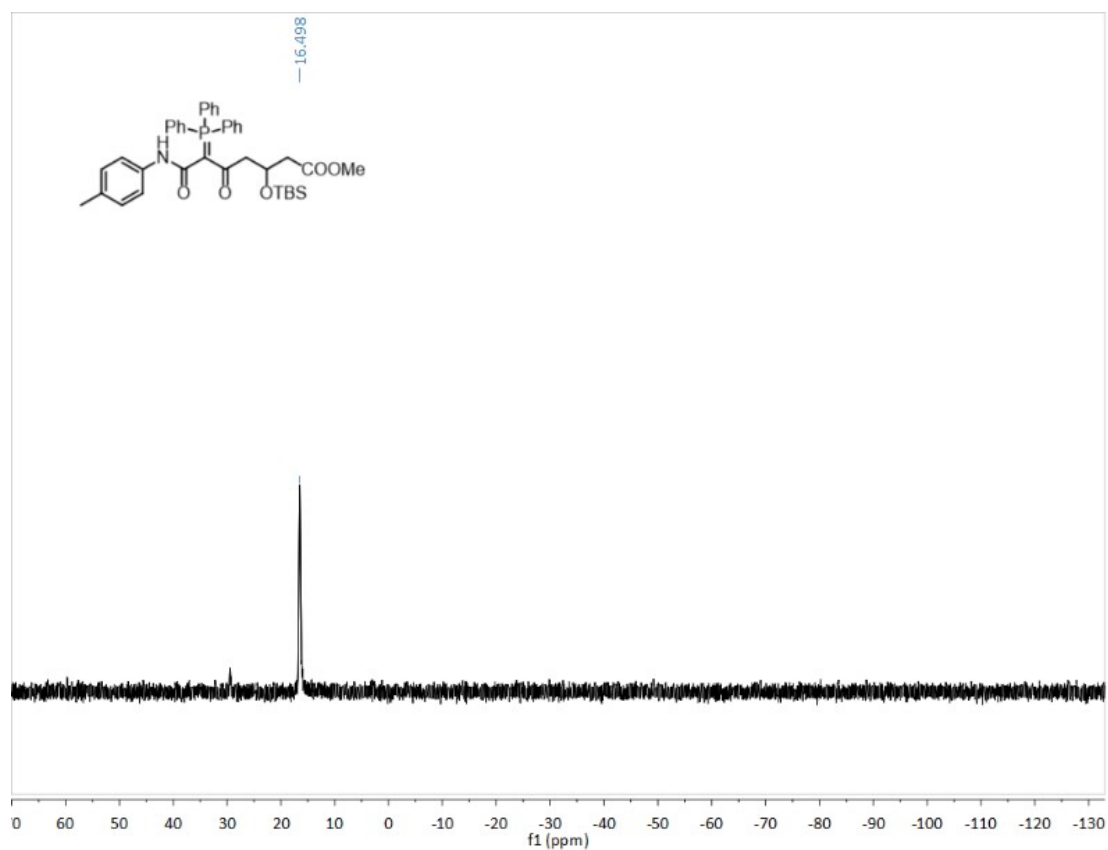

$^1\text{H}$  NMR (400 MHz,  $\text{CDCl}_3$ ) of compound **7a**

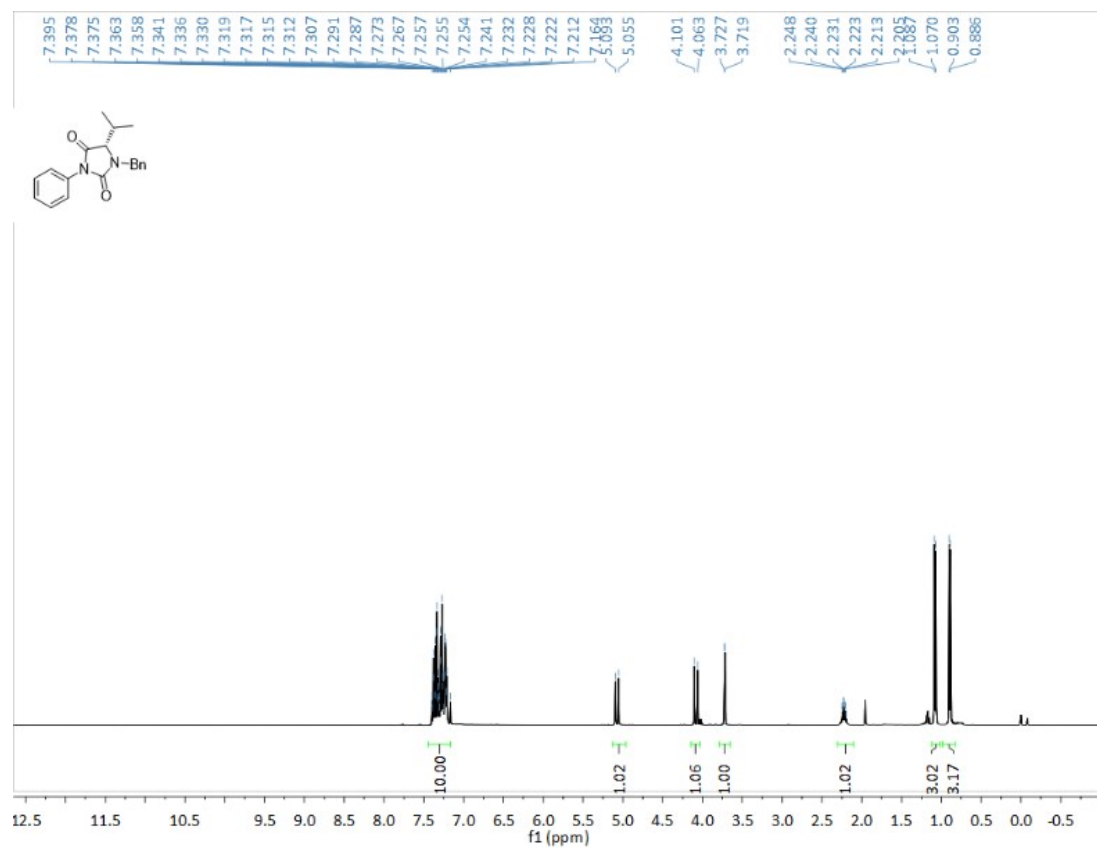

$^{13}\text{C}$  NMR (101 MHz,  $\text{CDCl}_3$ ) of compound **7a**

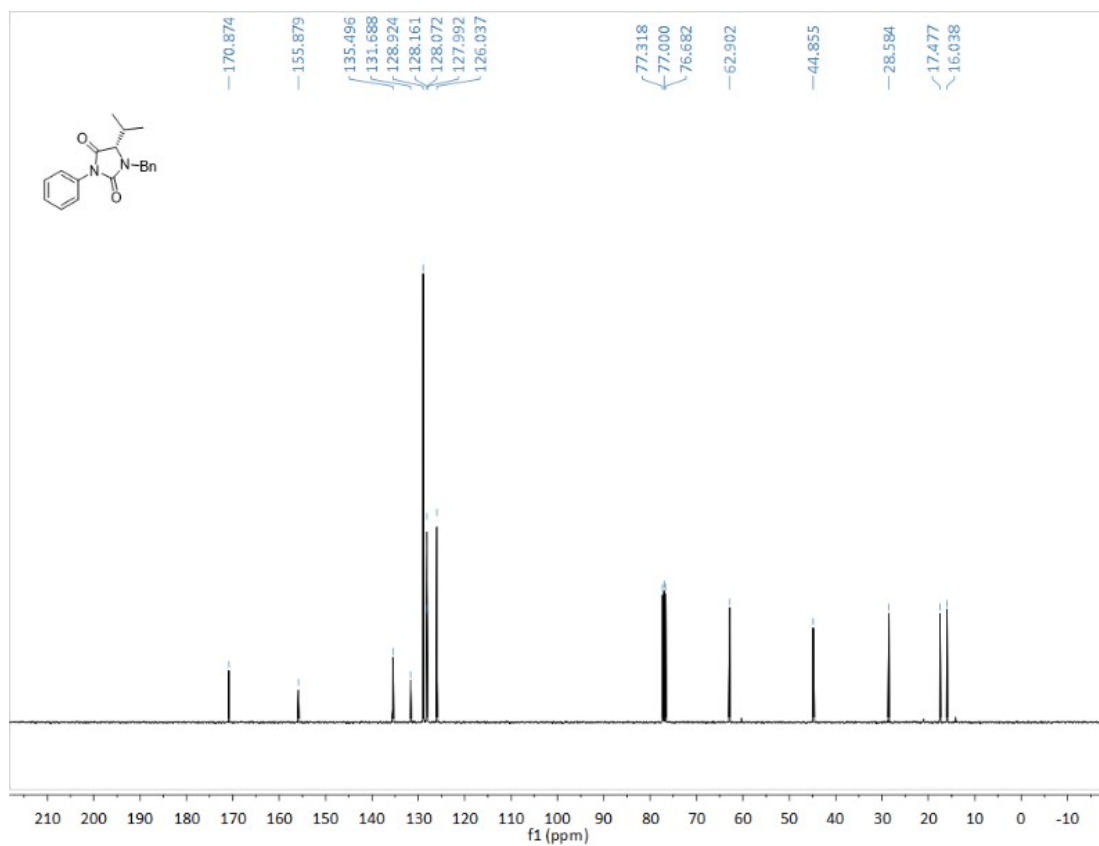

$^1\text{H}$  NMR (400 MHz,  $\text{CDCl}_3$ ) of compound **7b**

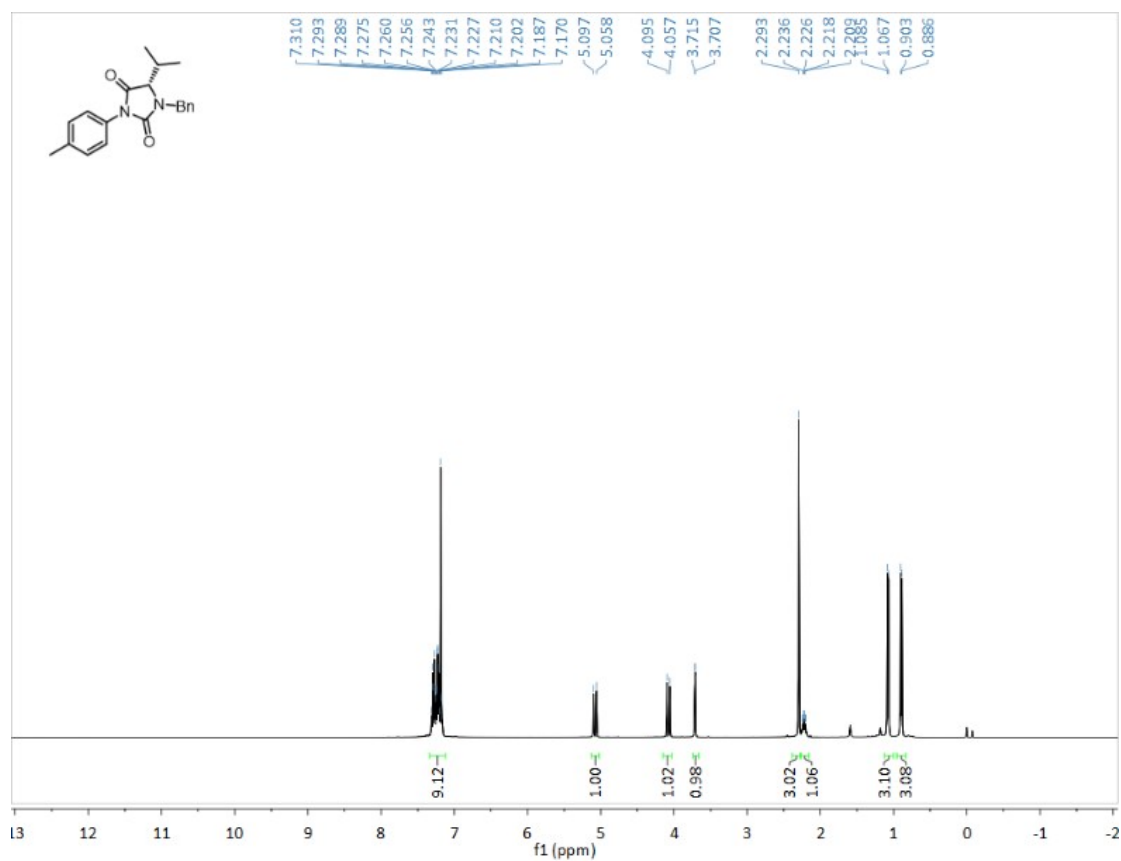

$^{13}\text{C}$  NMR (101 MHz,  $\text{CDCl}_3$ ) of compound **7b**

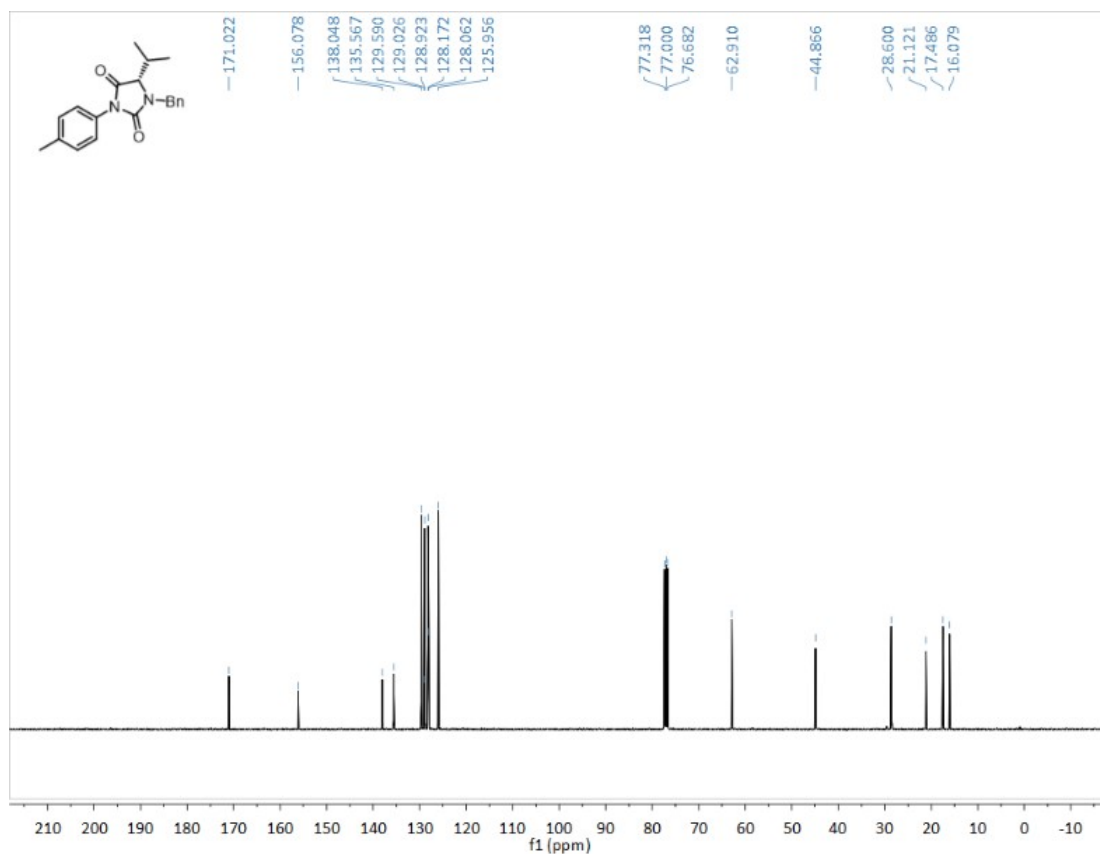

$^1\text{H}$  NMR (400 MHz,  $\text{CDCl}_3$ ) of compound **7c**

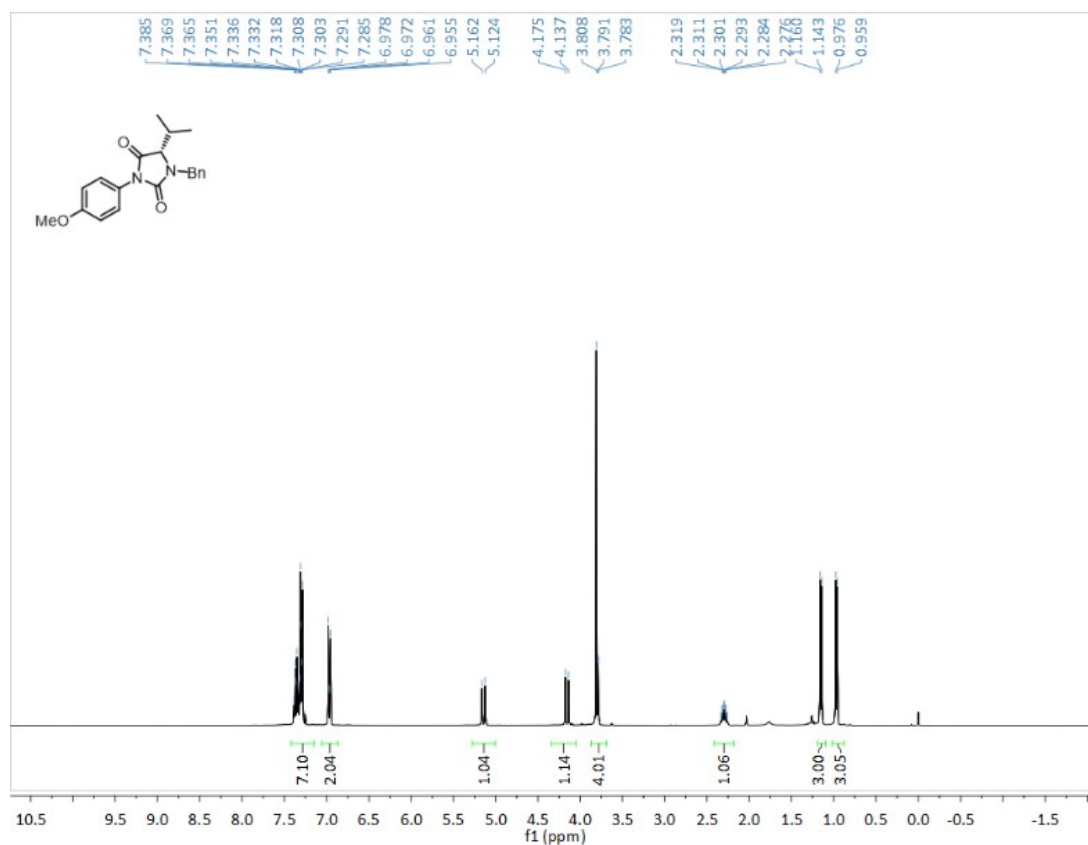



$^{13}\text{C}$  NMR (101 MHz,  $\text{CDCl}_3$ ) of compound **7c**

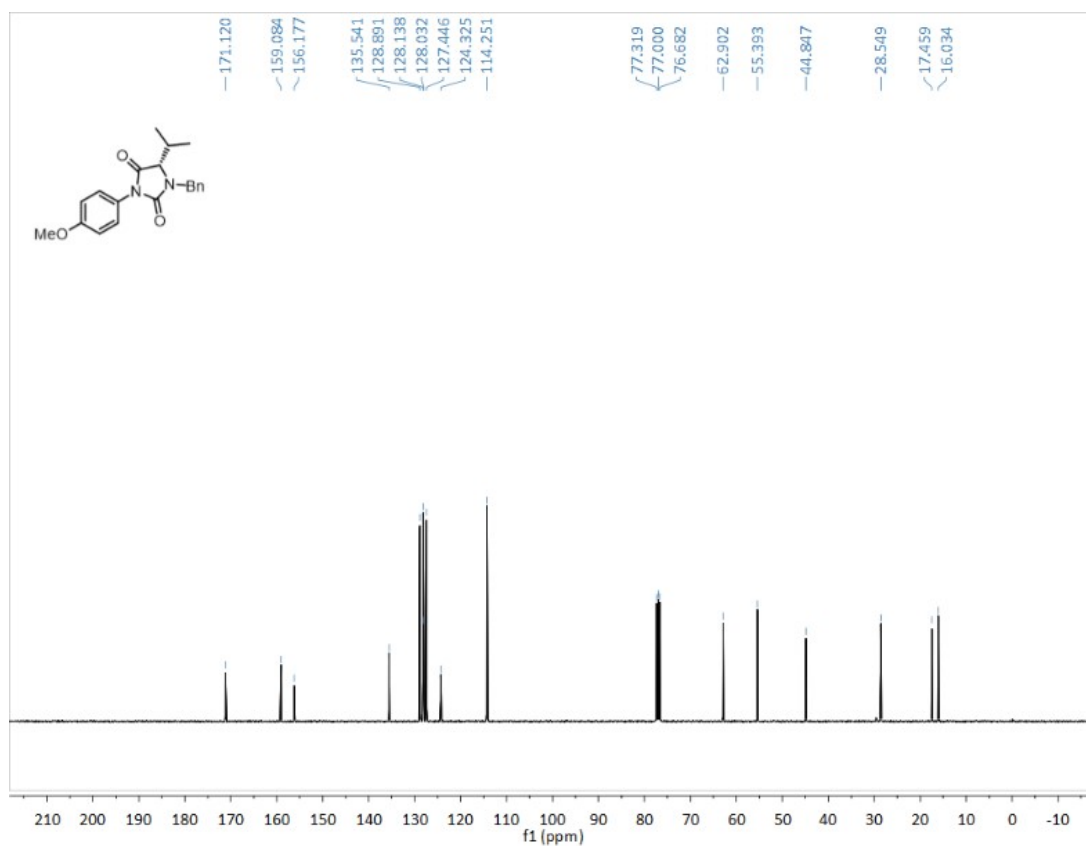

$^1\text{H}$  NMR (400 MHz,  $\text{CDCl}_3$ ) of compound **7d**

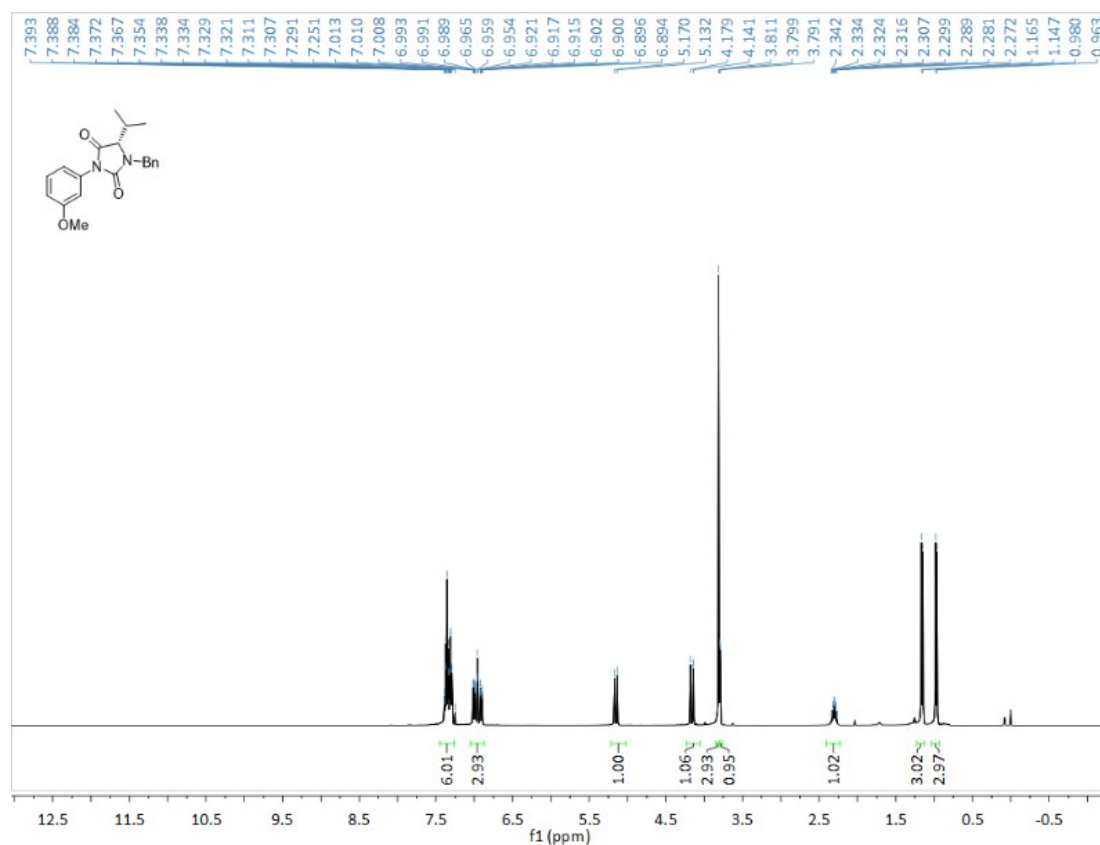

$^{13}\text{C}$  NMR (101 MHz,  $\text{CDCl}_3$ ) of compound **7d**

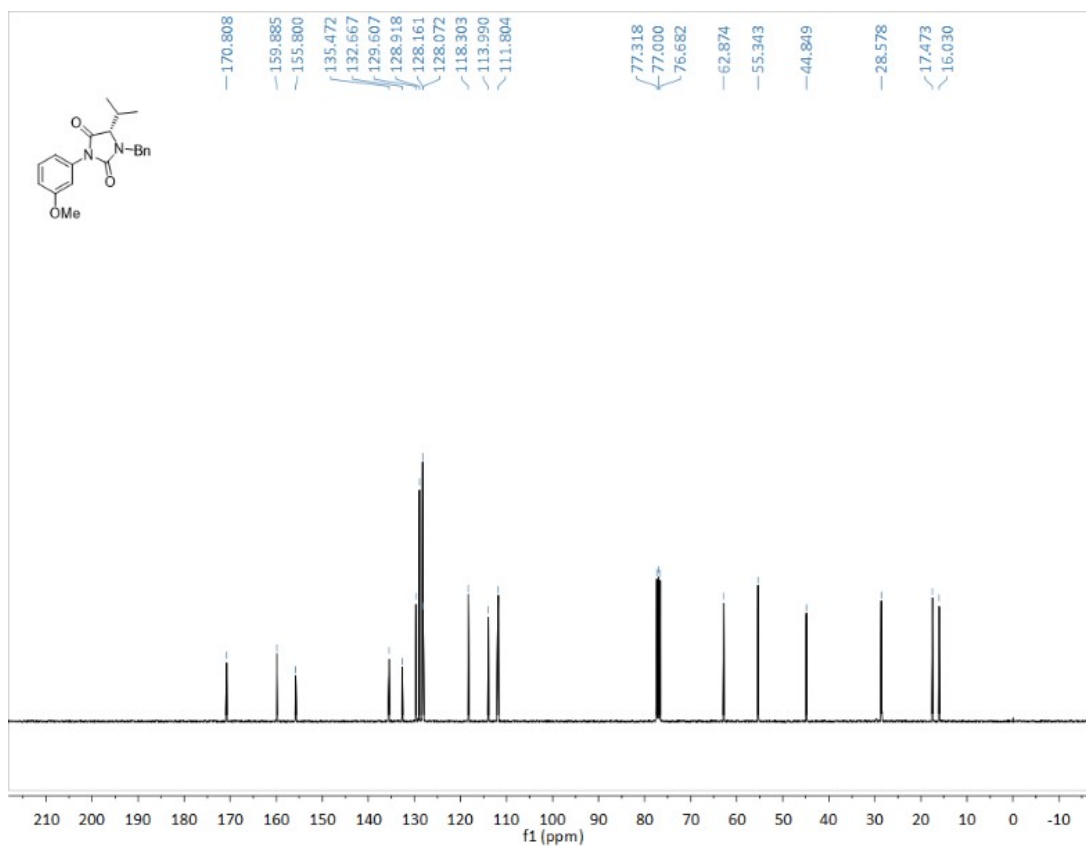

$^1\text{H}$  NMR (400 MHz,  $\text{CDCl}_3$ ) of compound **7e**

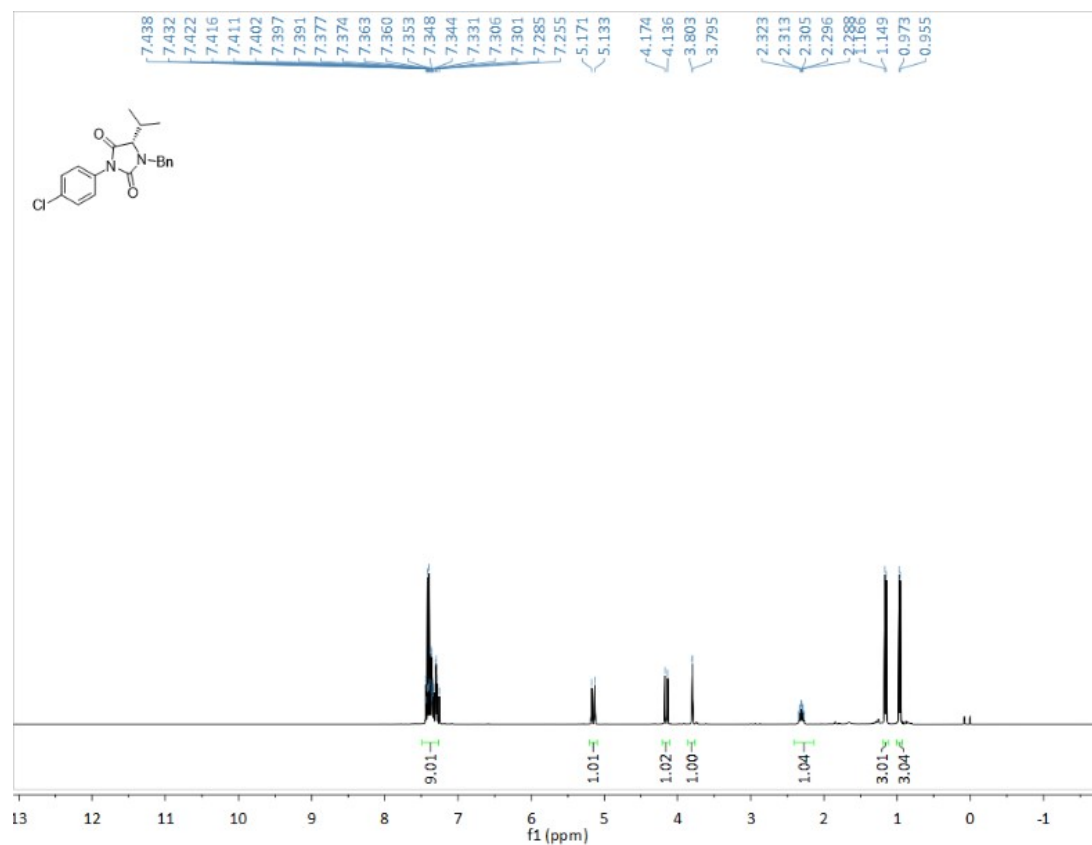

$^{13}\text{C}$  NMR (101 MHz,  $\text{CDCl}_3$ ) of compound **7e**

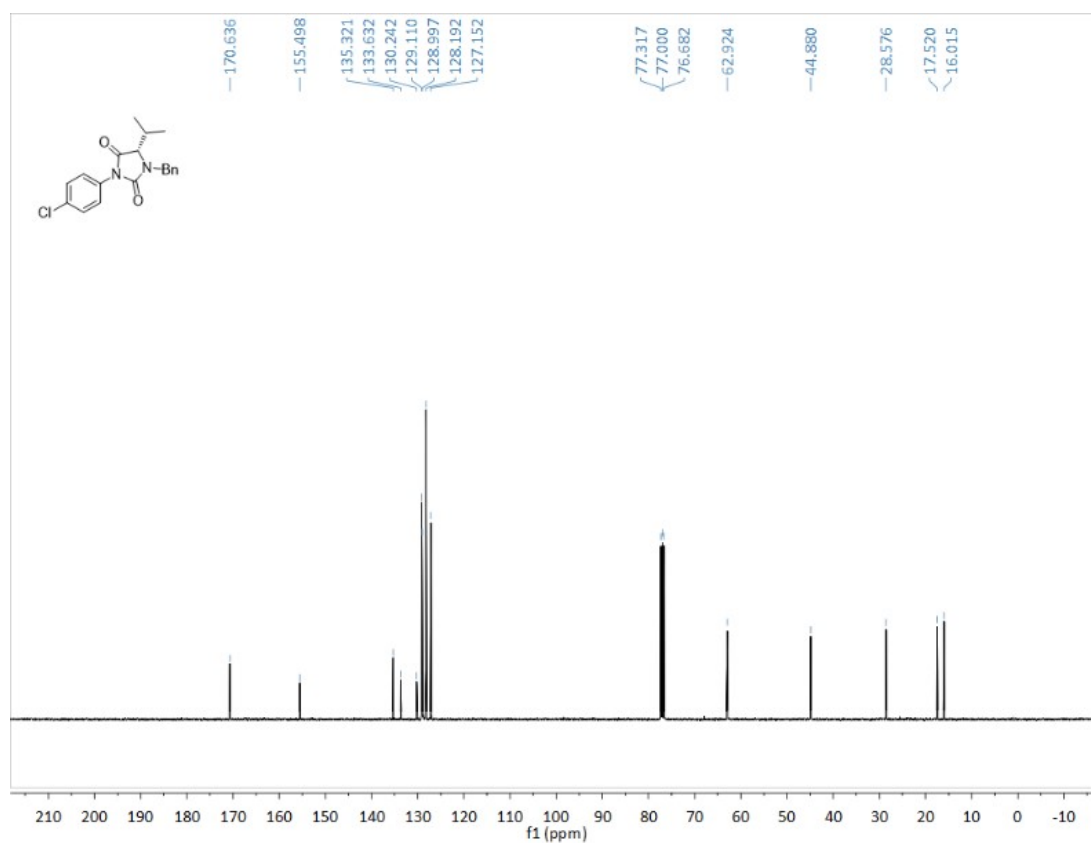

$^1\text{H}$  NMR (400 MHz,  $\text{CDCl}_3$ ) of compound **7f**

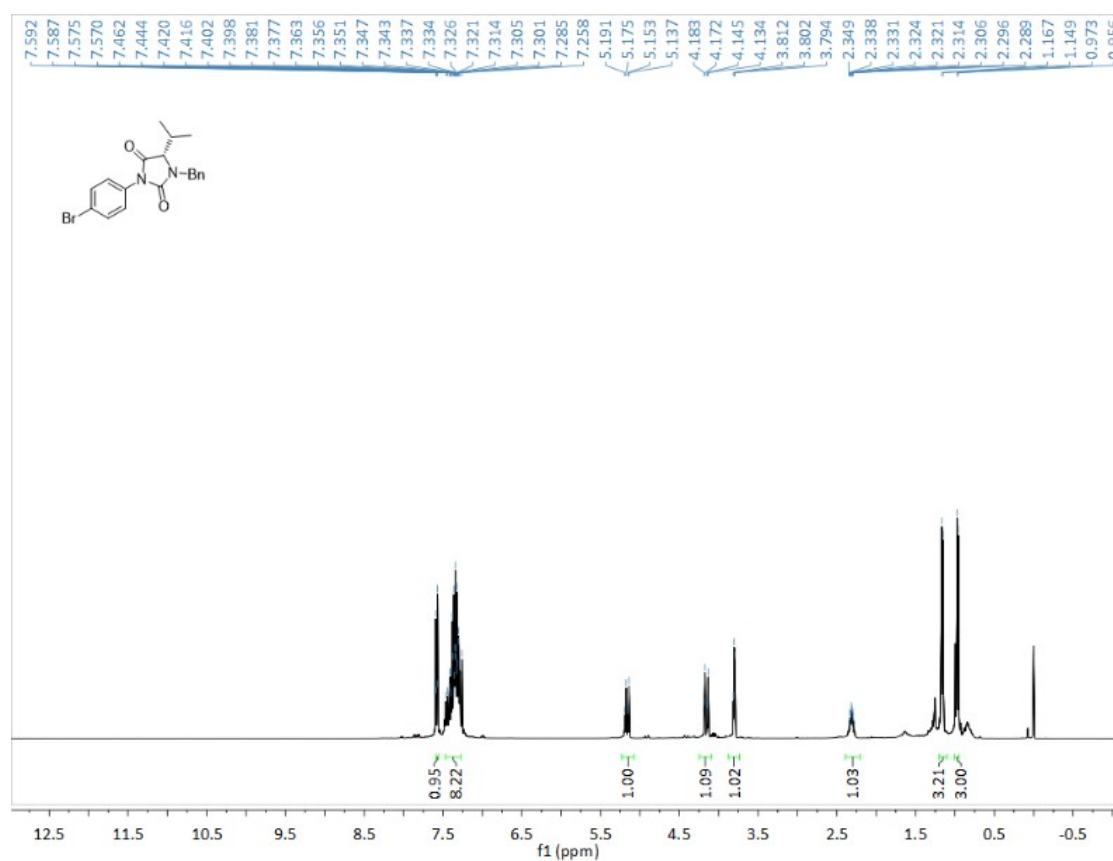

$^{13}\text{C}$  NMR (101 MHz,  $\text{CDCl}_3$ ) of compound **7f**

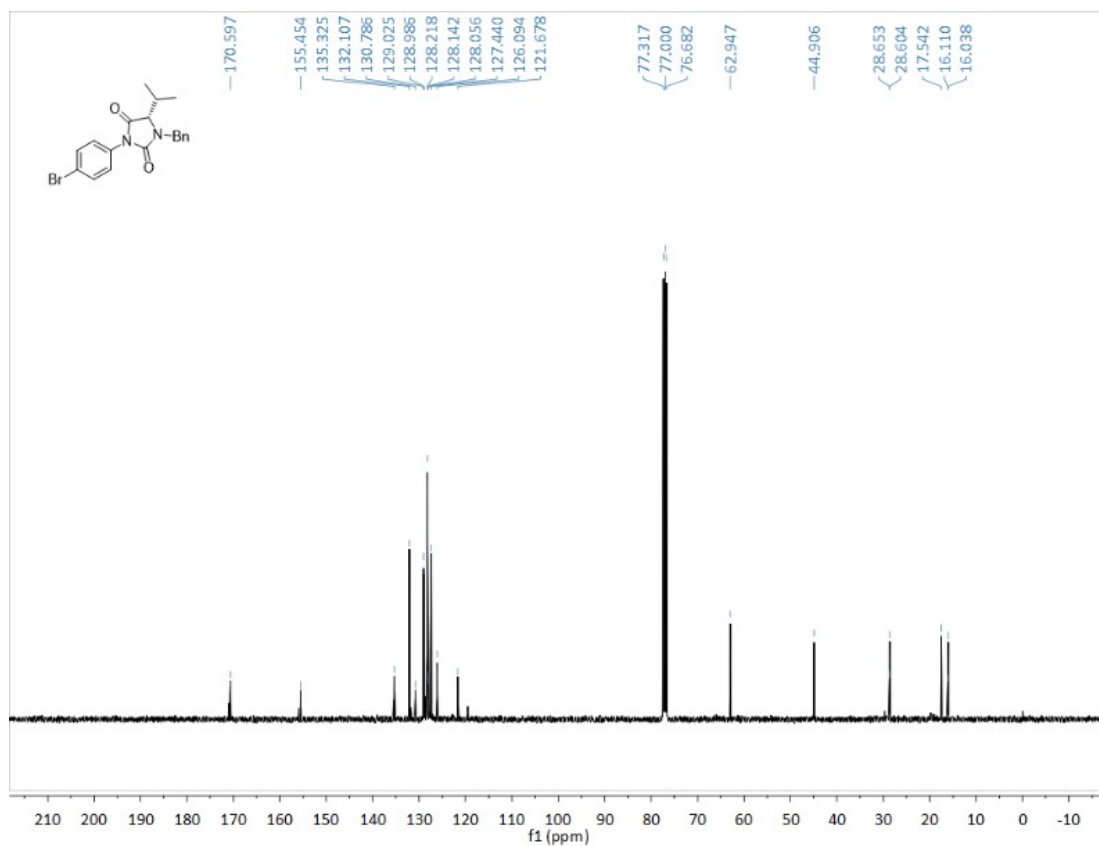

$^1\text{H}$  NMR (400 MHz,  $\text{CDCl}_3$ ) of compound **7g**

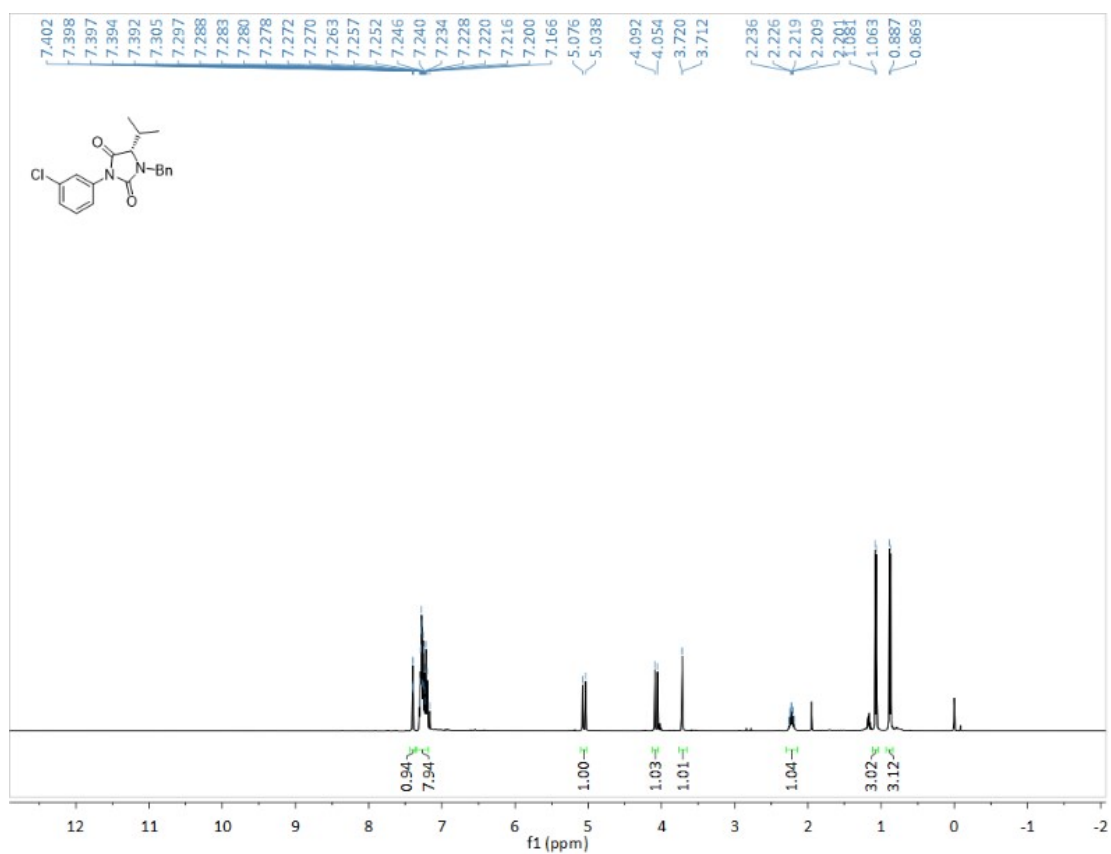

$^{13}\text{C}$  NMR (101 MHz,  $\text{CDCl}_3$ ) of compound **7g**

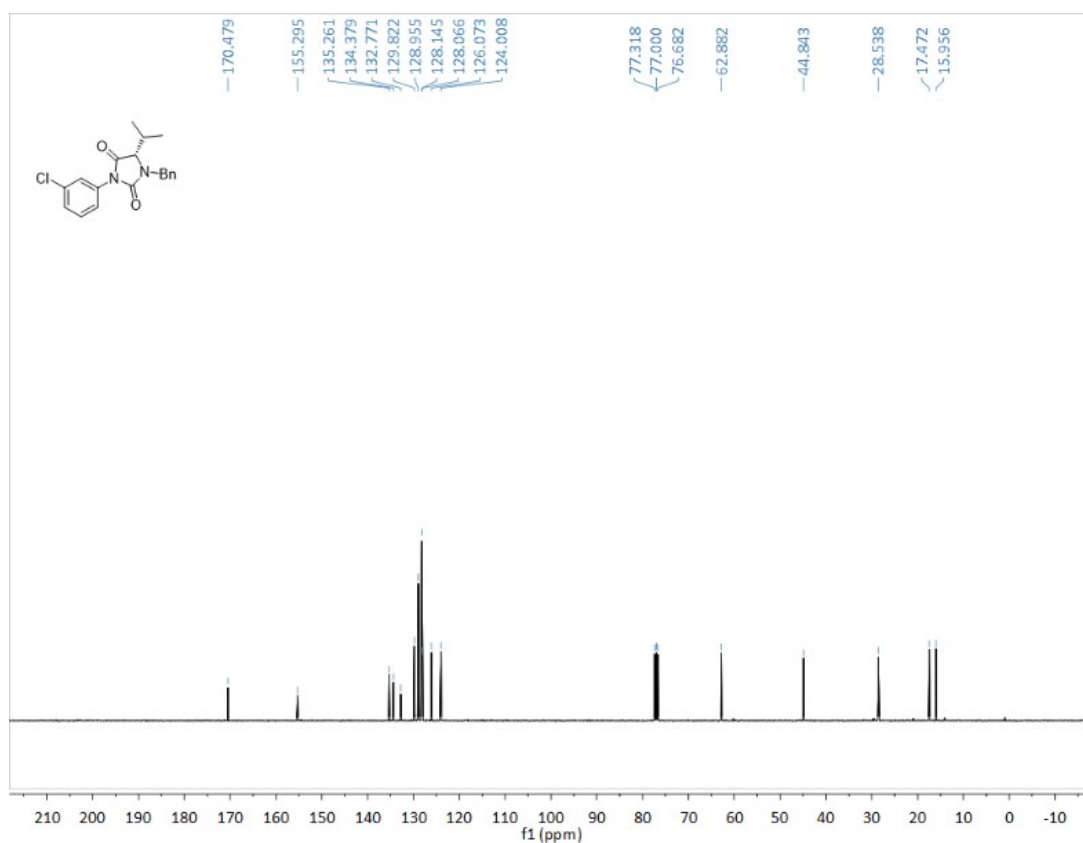

$^1\text{H}$  NMR (400 MHz,  $\text{CDCl}_3$ ) of compound **7h**

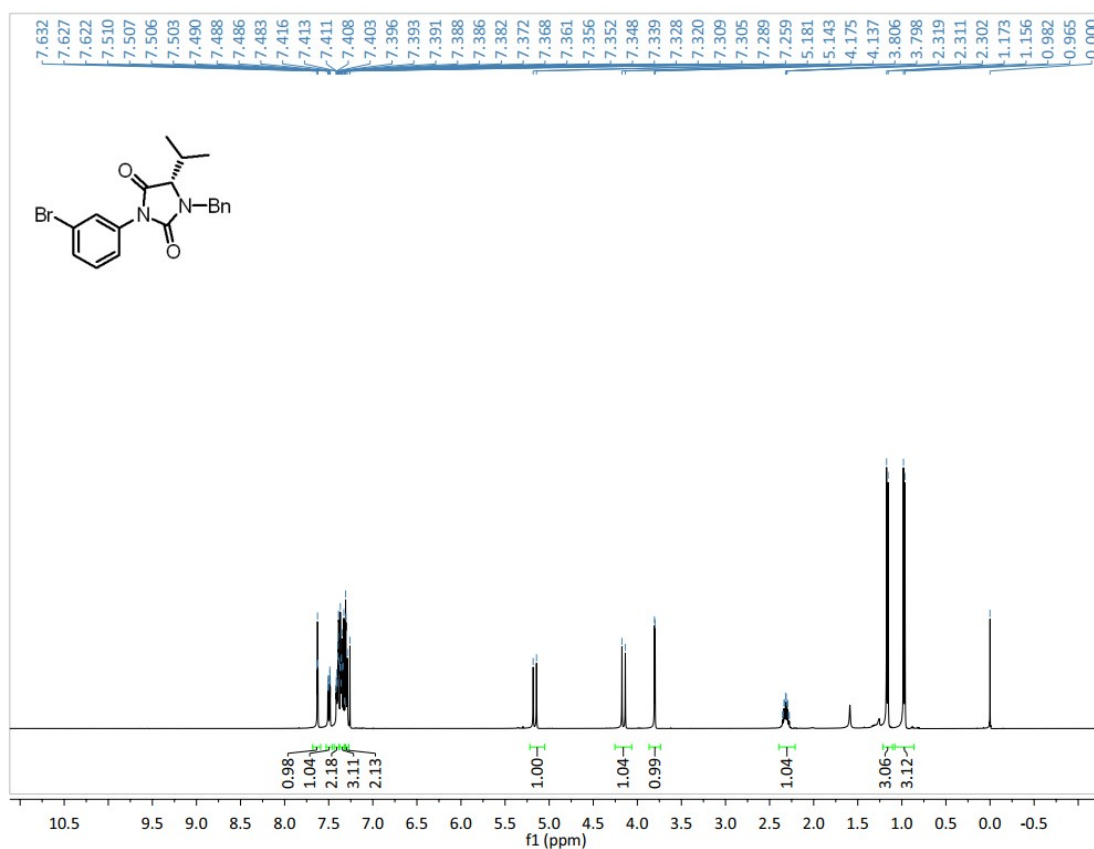

$^{13}\text{C}$  NMR (101 MHz,  $\text{CDCl}_3$ ) of compound **7h**

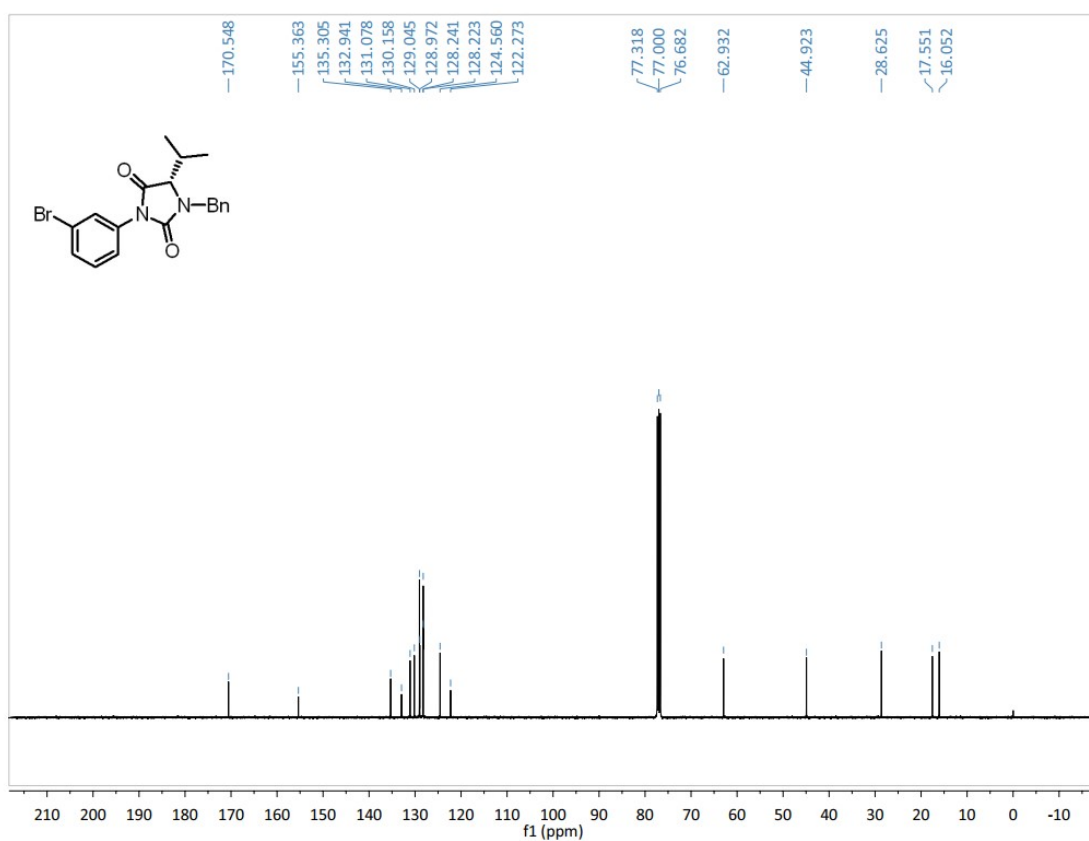

$^1\text{H}$  NMR (400 MHz,  $\text{CDCl}_3$ ) of compound **7i**

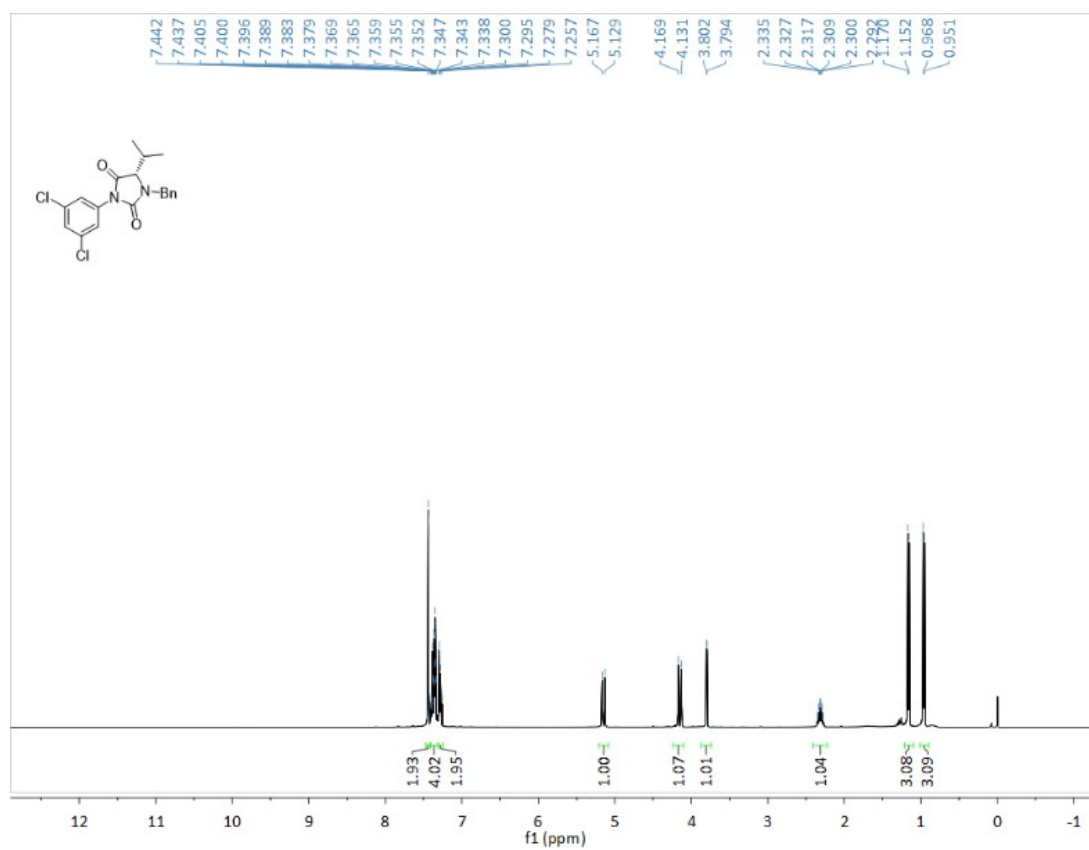

$^{13}\text{C}$  NMR (101 MHz,  $\text{CDCl}_3$ ) of compound **7i**

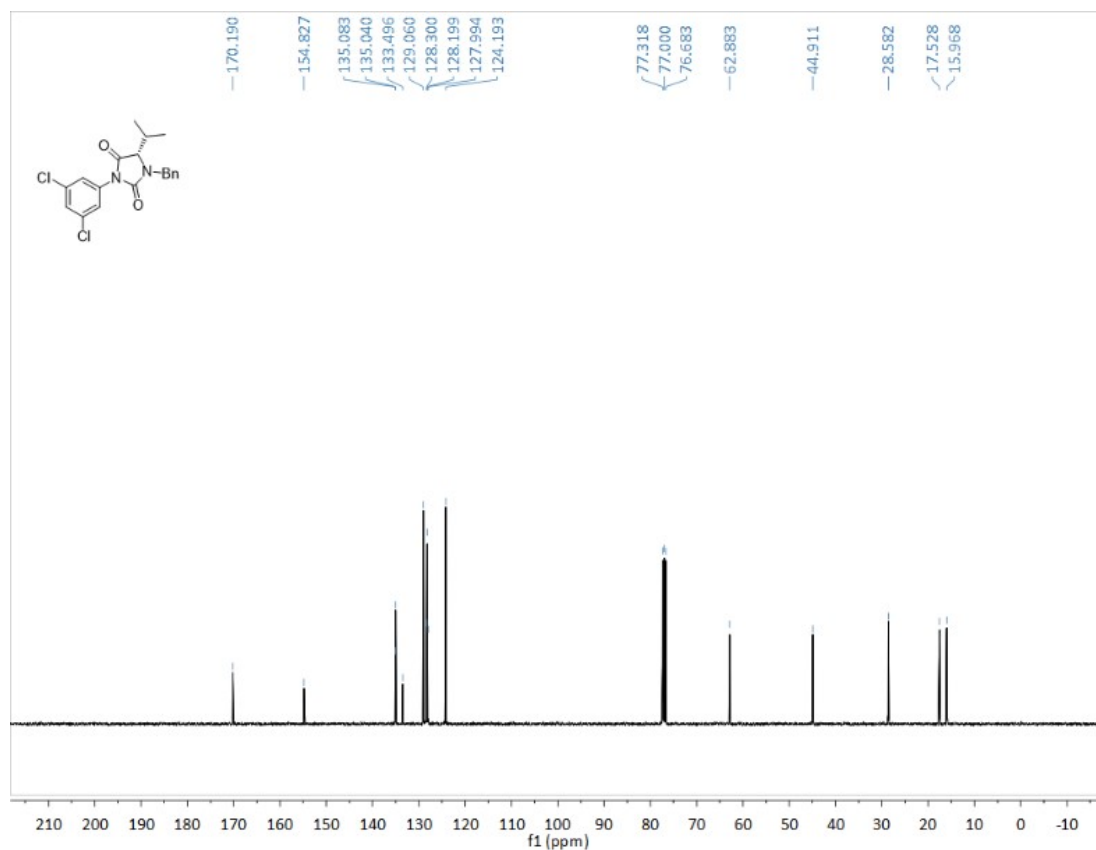

$^1\text{H}$  NMR (400 MHz,  $\text{CDCl}_3$ ) of compound **7j**

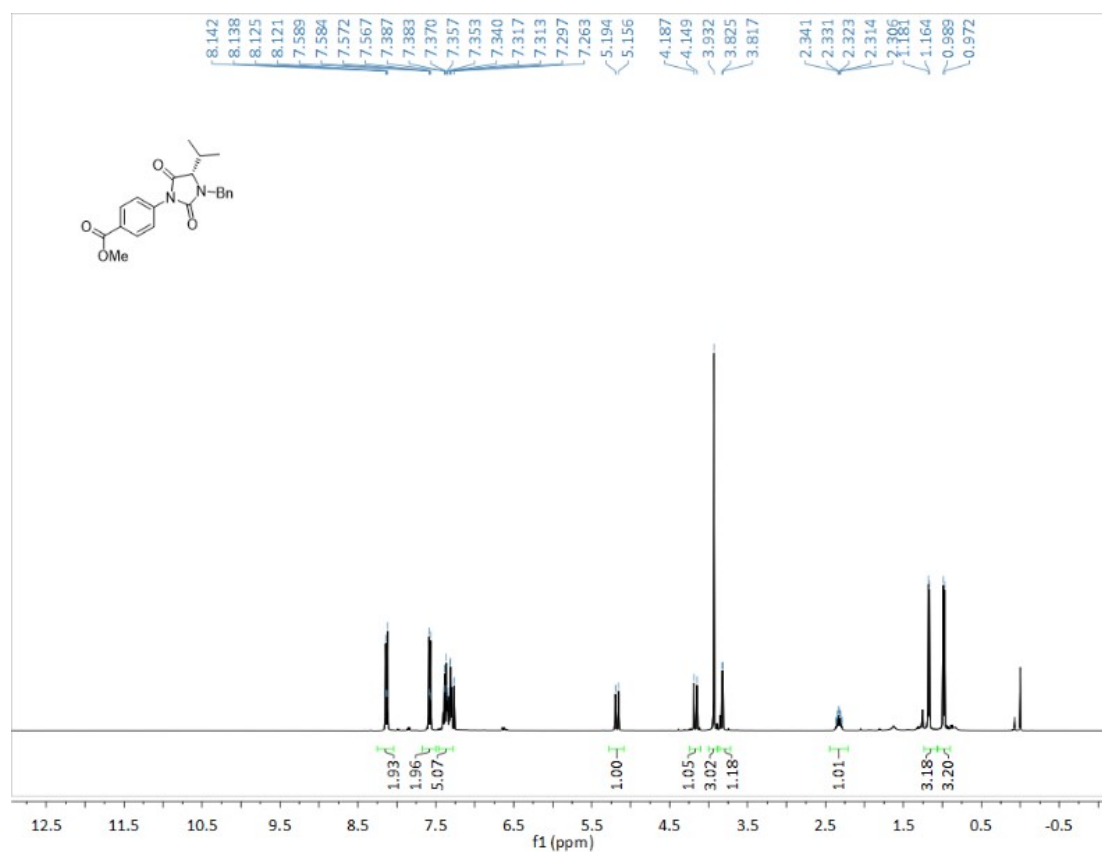

$^{13}\text{C}$  NMR (101 MHz,  $\text{CDCl}_3$ ) of compound **7j**

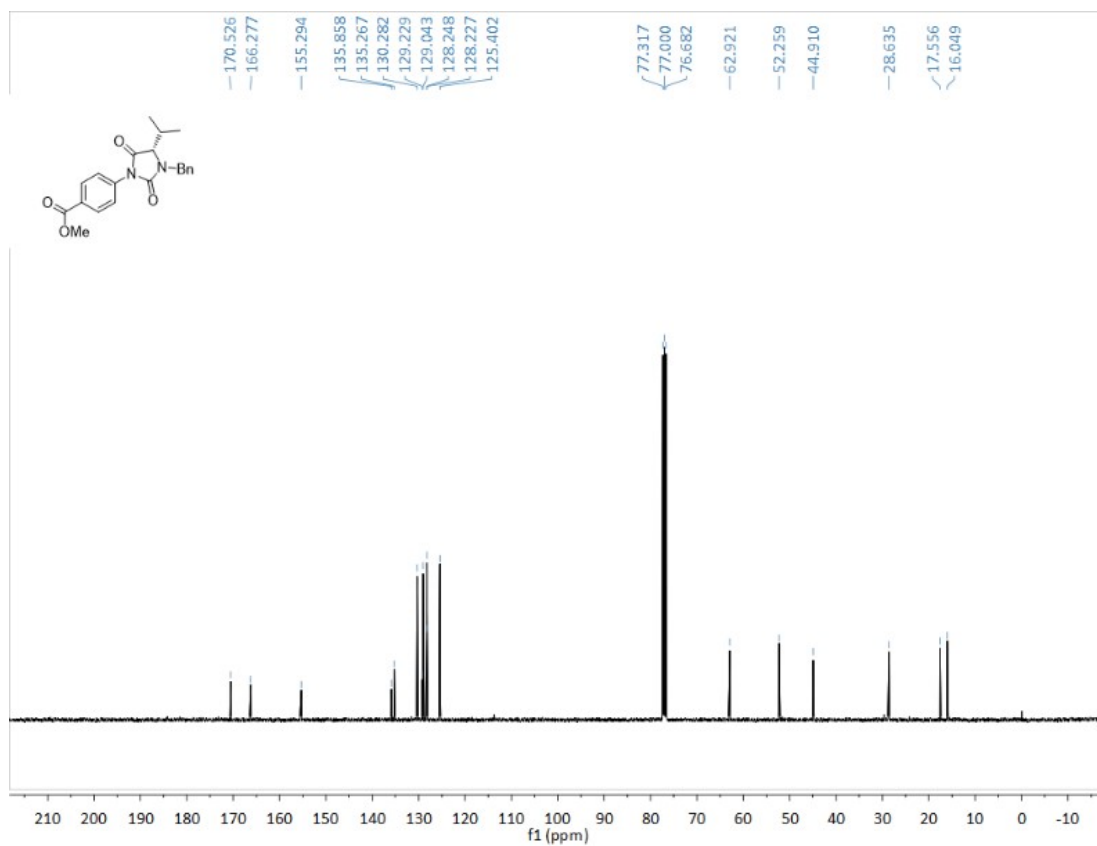

$^1\text{H}$  NMR (400 MHz,  $\text{CDCl}_3$ ) of compound **7k**

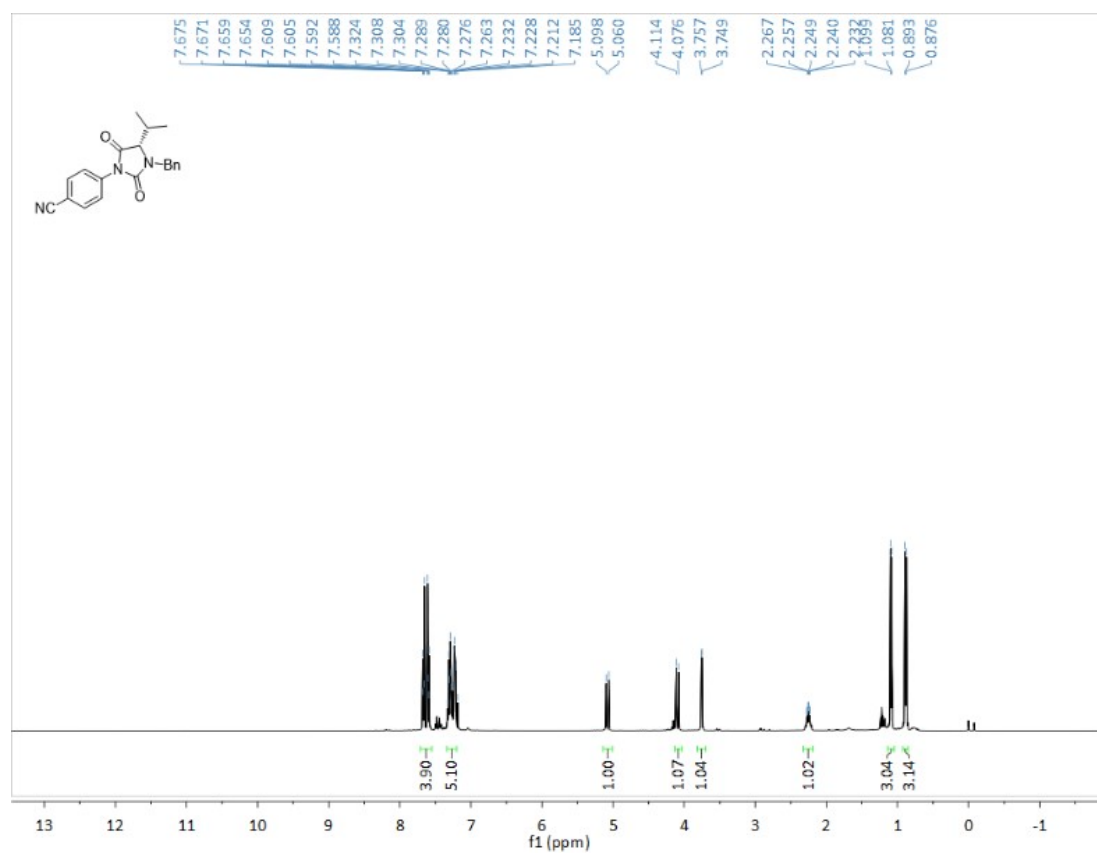



$^{13}\text{C}$  NMR (101 MHz,  $\text{CDCl}_3$ ) of compound **7k**

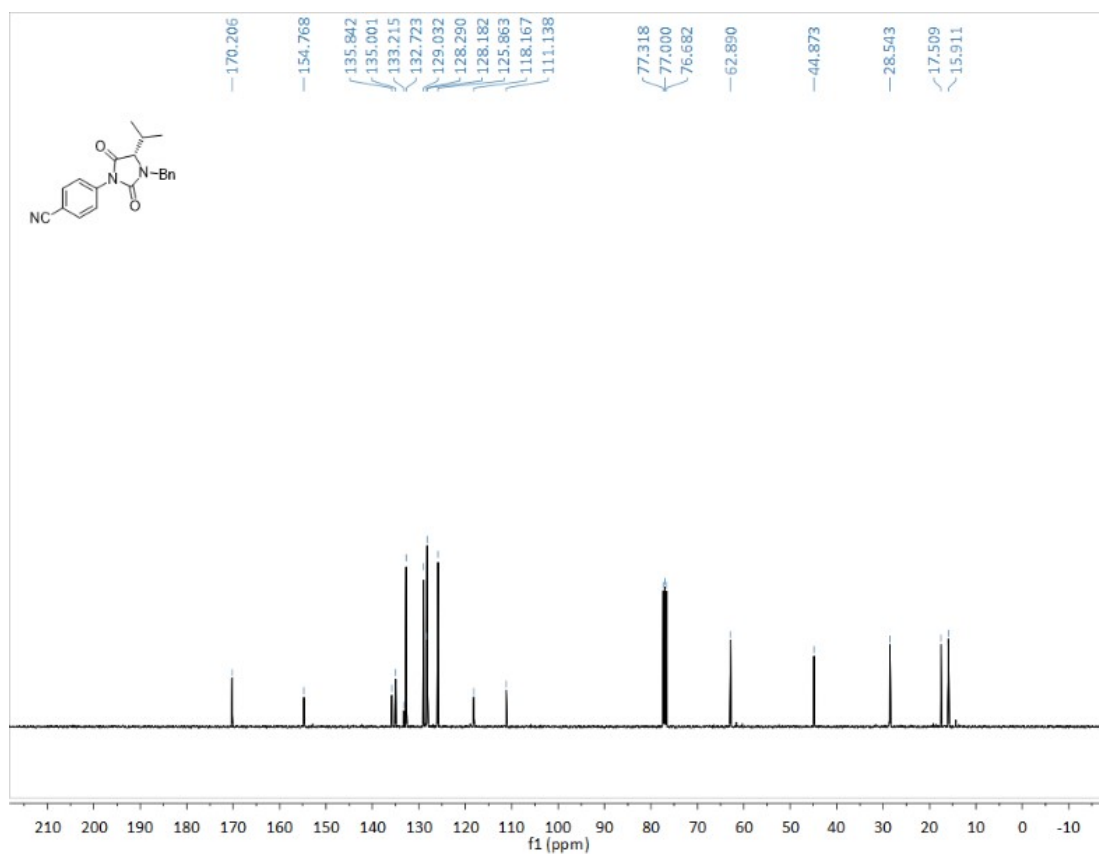

$^1\text{H}$  NMR (400 MHz,  $\text{CDCl}_3$ ) of compound **7l**

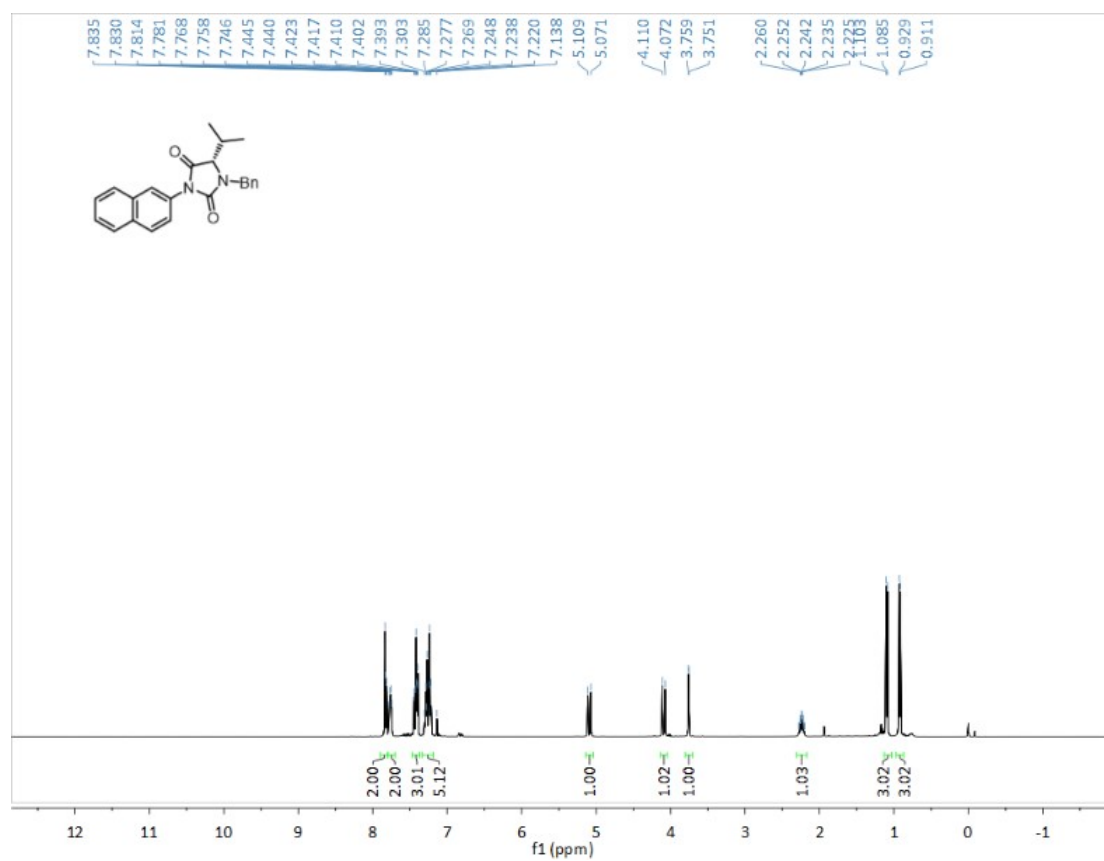

$^{13}\text{C}$  NMR (101 MHz,  $\text{CDCl}_3$ ) of compound **7l**

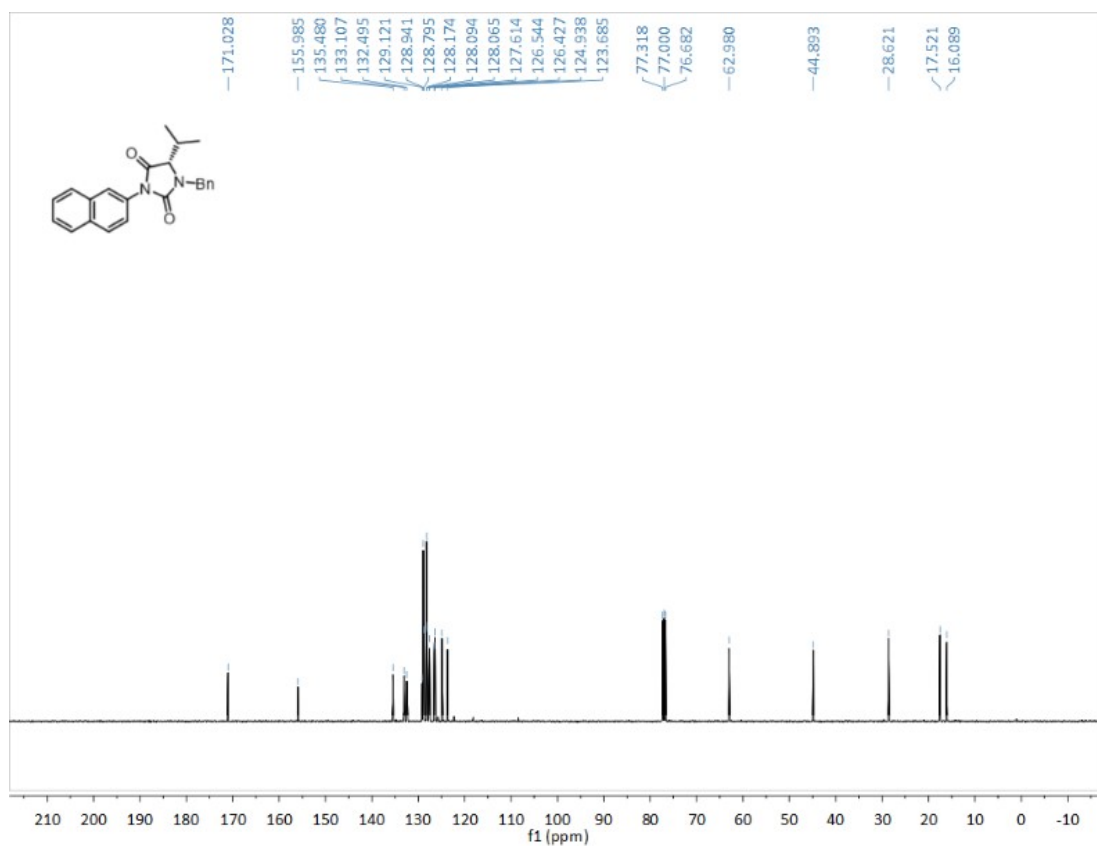

$^1\text{H}$  NMR (400 MHz,  $\text{CDCl}_3$ ) of compound **7m**

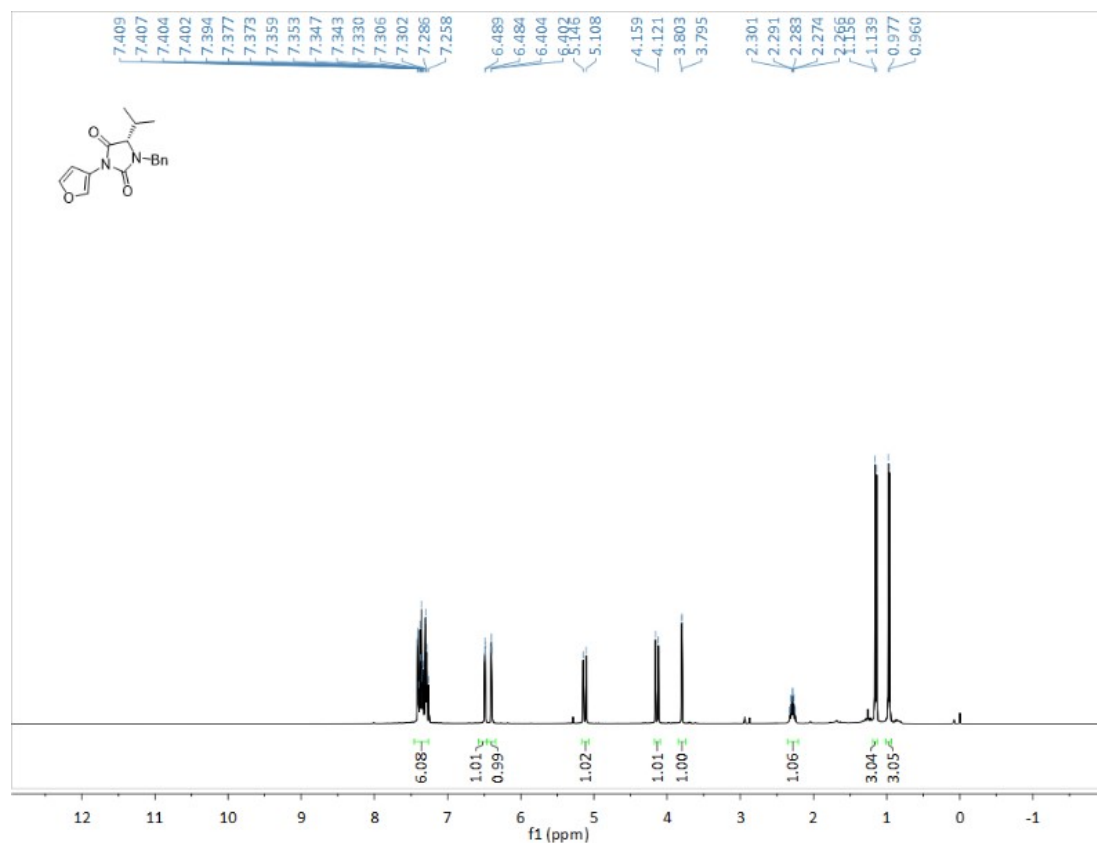

$^{13}\text{C}$  NMR (101 MHz,  $\text{CDCl}_3$ ) of compound **7m**

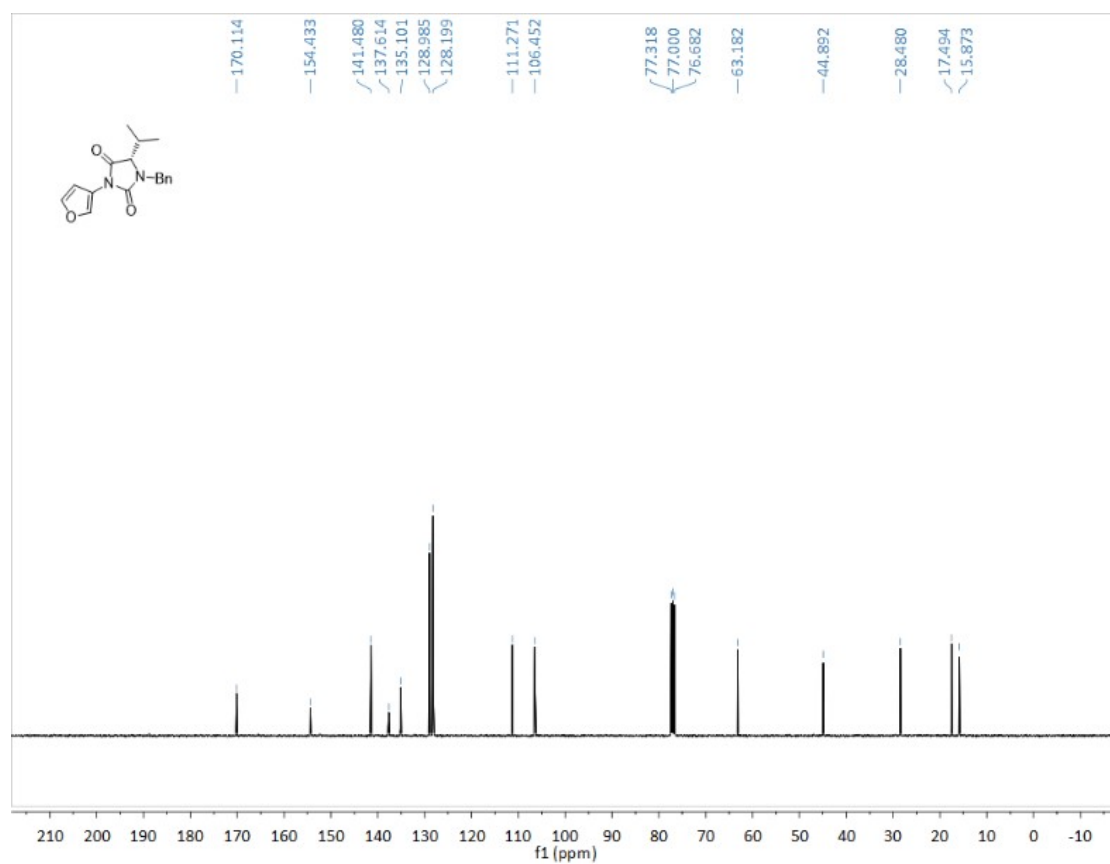

$^1\text{H}$  NMR (400 MHz,  $\text{CDCl}_3$ ) of compound **7n**

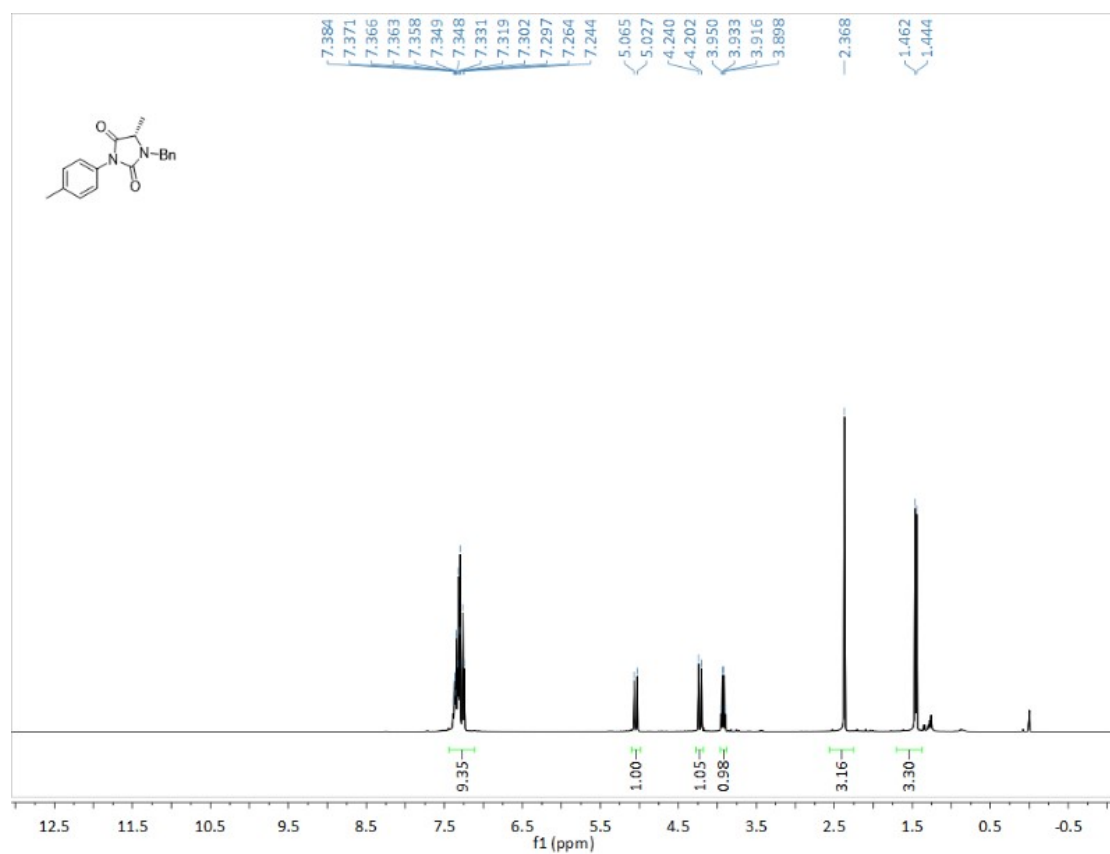

$^{13}\text{C}$  NMR (101 MHz,  $\text{CDCl}_3$ ) of compound **7n**

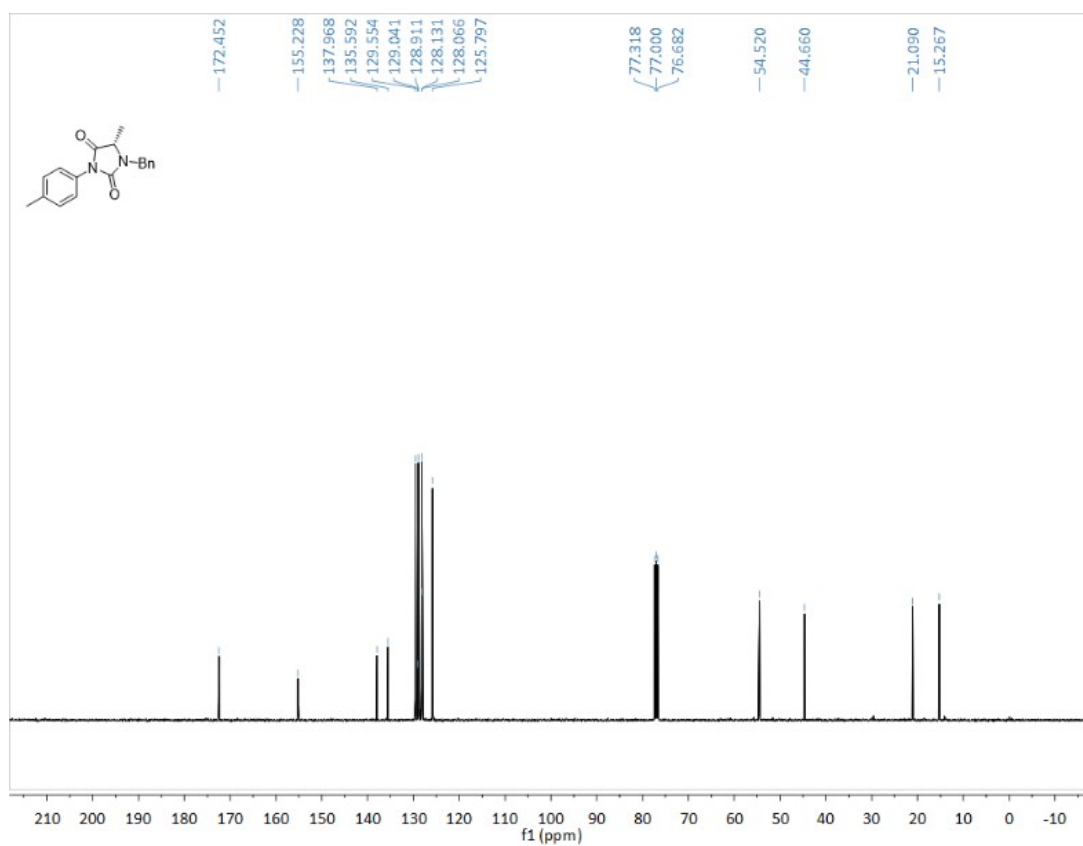

$^1\text{H}$  NMR (400 MHz,  $\text{CDCl}_3$ ) of compound **7o**

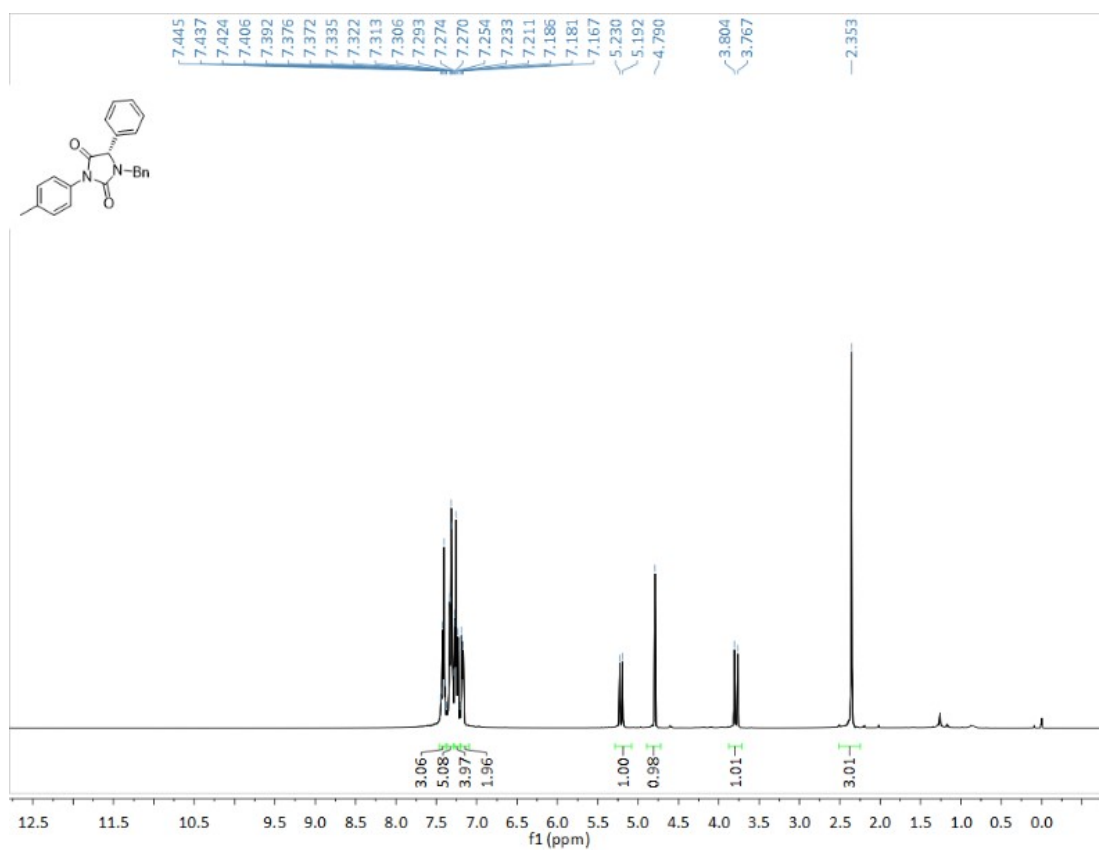

$^{13}\text{C}$  NMR (101 MHz,  $\text{CDCl}_3$ ) of compound **7o**

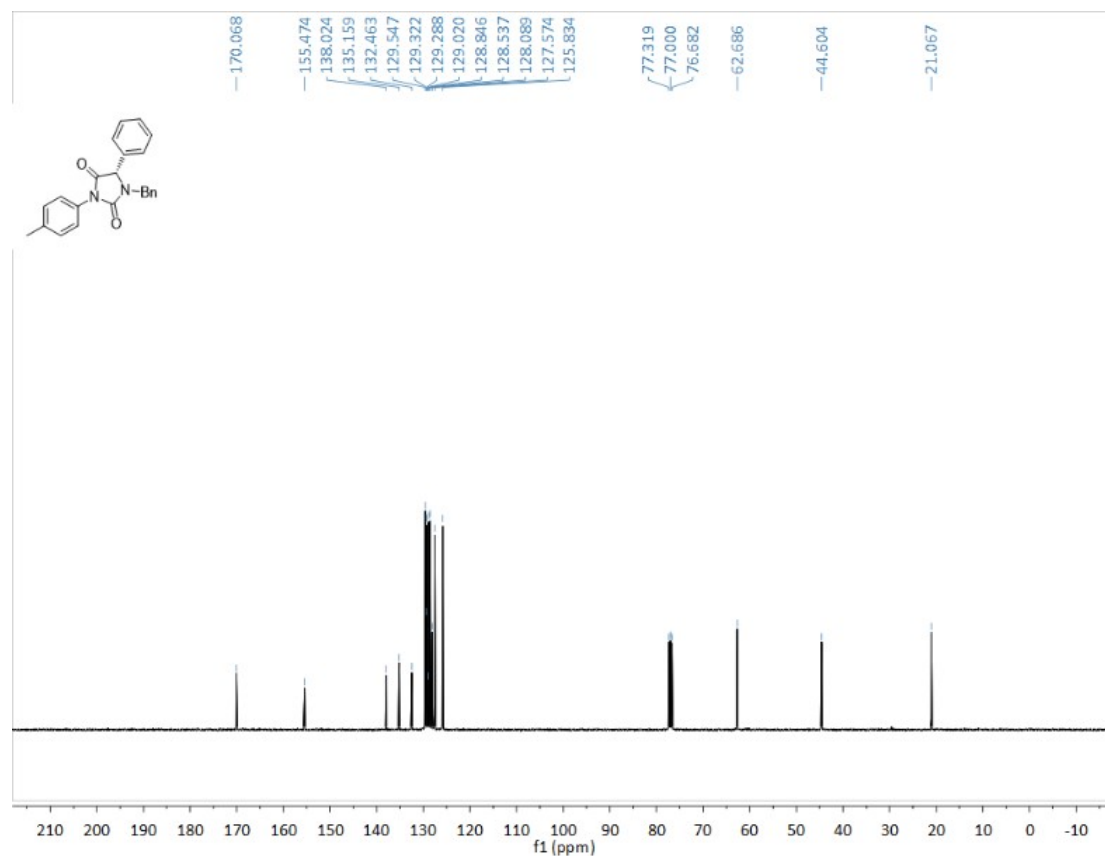

$^1\text{H}$  NMR (400 MHz,  $\text{CDCl}_3$ ) of compound **7p**

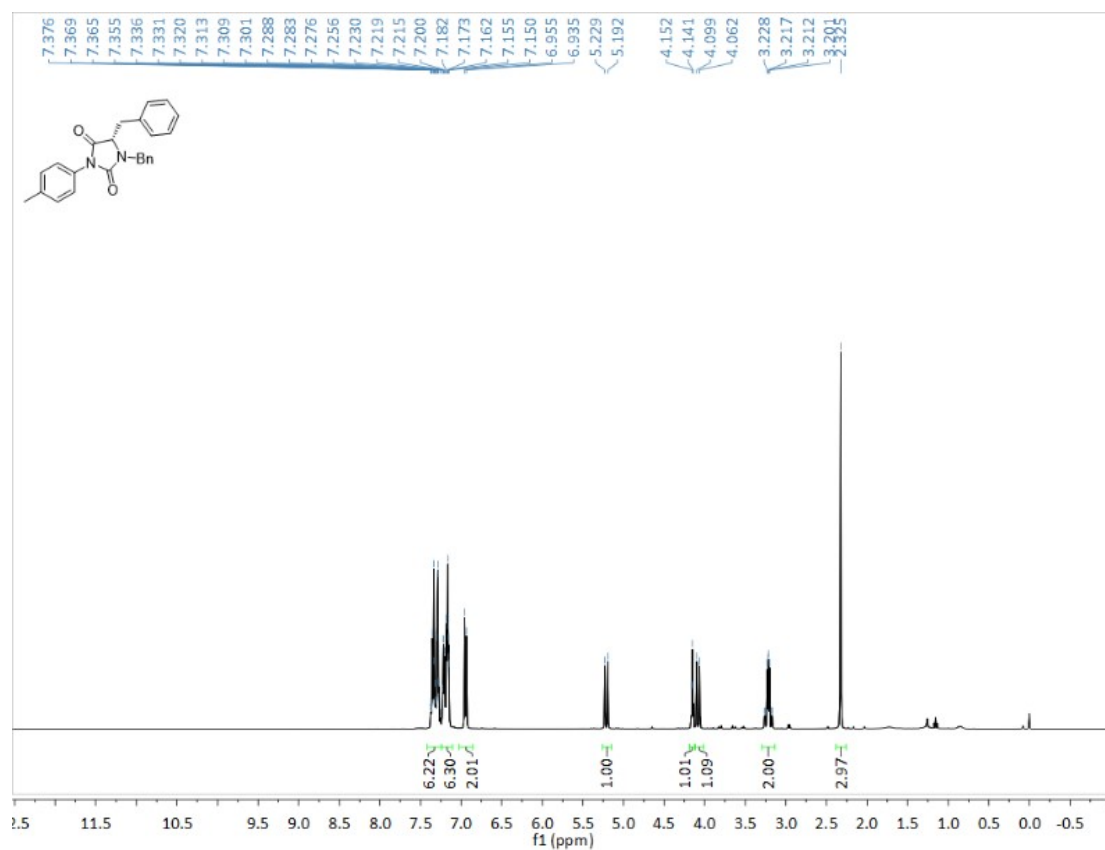

$^{13}\text{C}$  NMR (101 MHz,  $\text{CDCl}_3$ ) of compound **7p**

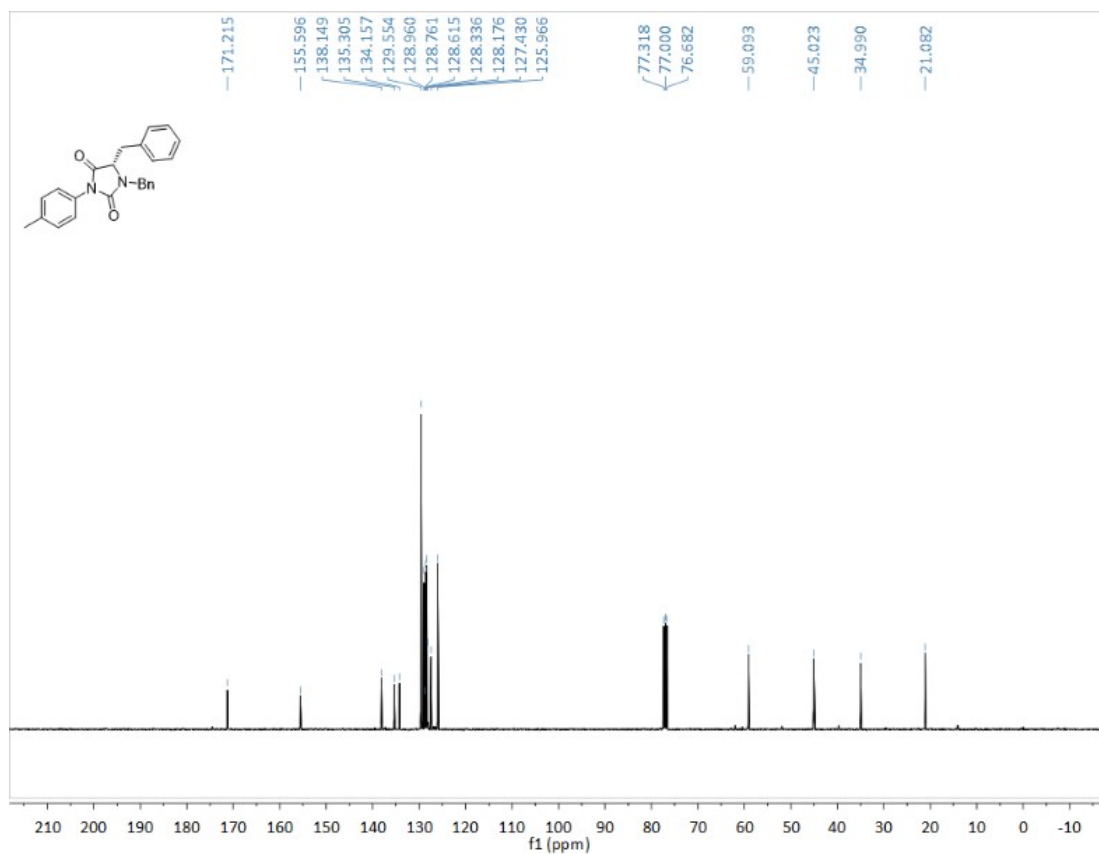

$^1\text{H}$  NMR (400 MHz,  $\text{CDCl}_3$ ) of compound **7q**

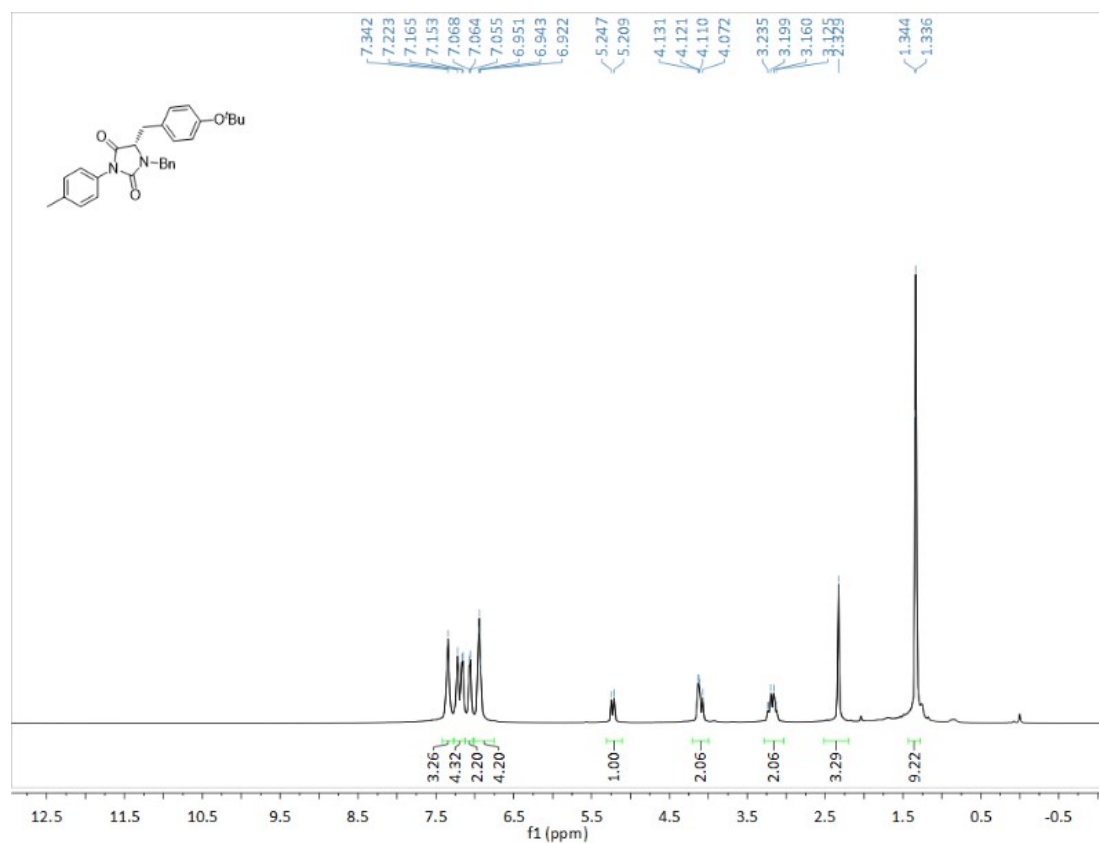

$^{13}\text{C}$  NMR (101 MHz,  $\text{CDCl}_3$ ) of compound **7q**

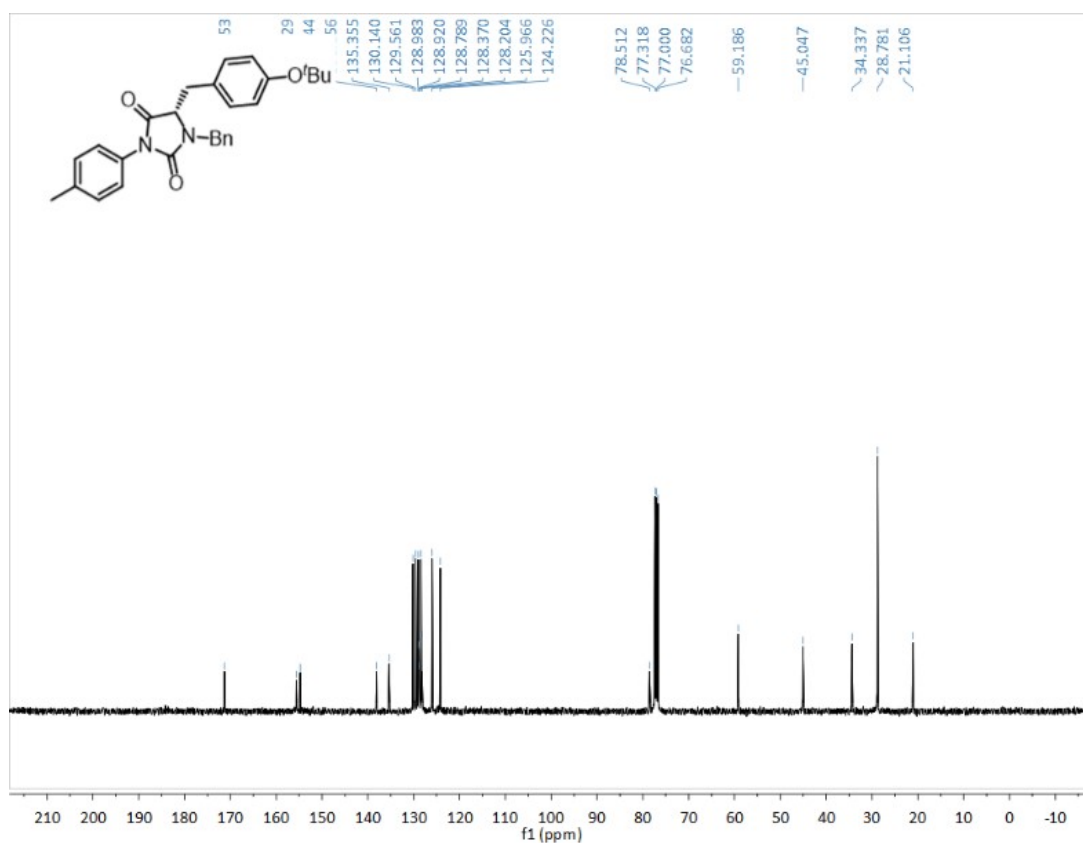

$^1\text{H}$  NMR (400 MHz,  $\text{CDCl}_3$ ) of compound **7r**

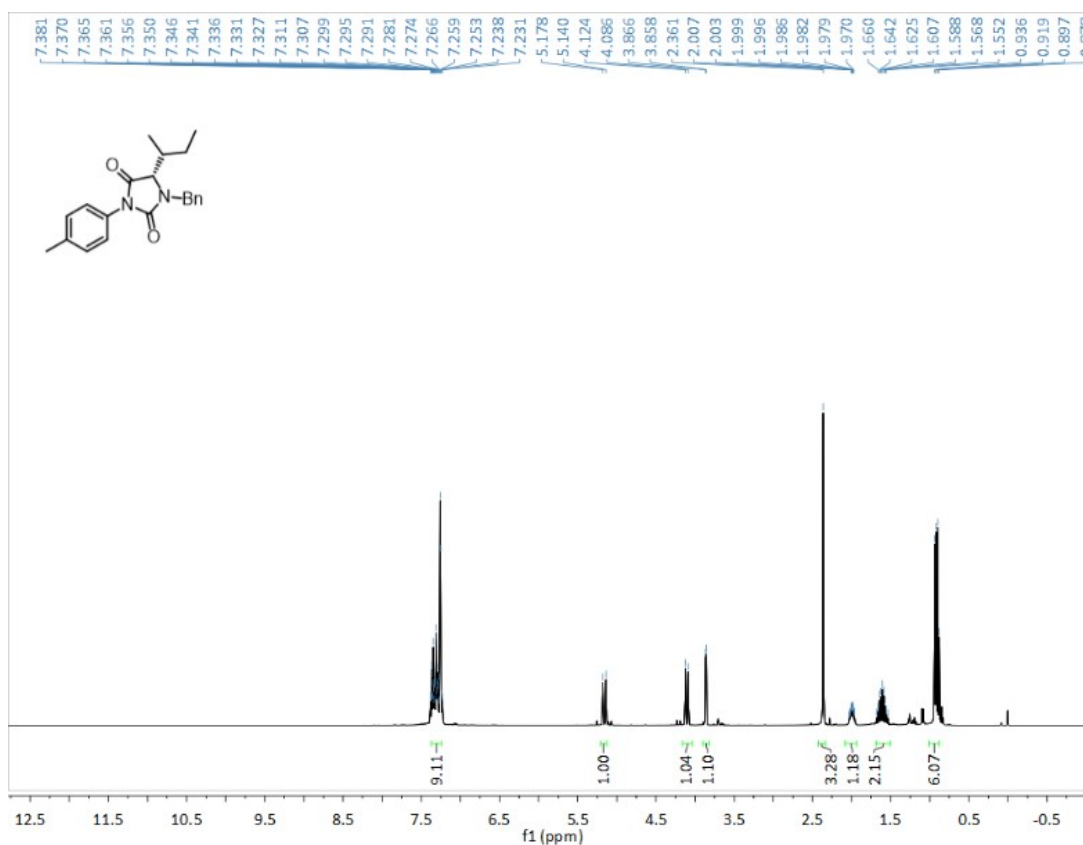

$^{13}\text{C}$  NMR (101 MHz,  $\text{CDCl}_3$ ) of compound **7r**

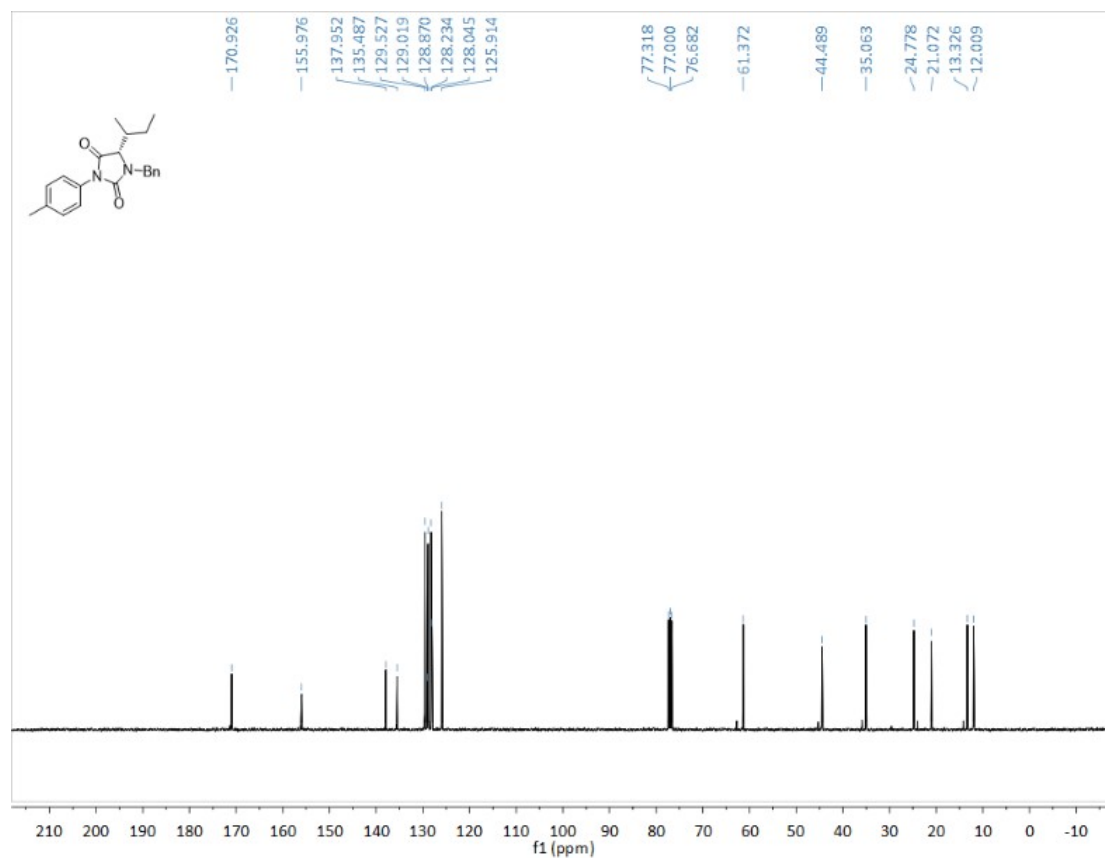

$^1\text{H}$  NMR (400 MHz,  $\text{CDCl}_3$ ) of compound **7s**

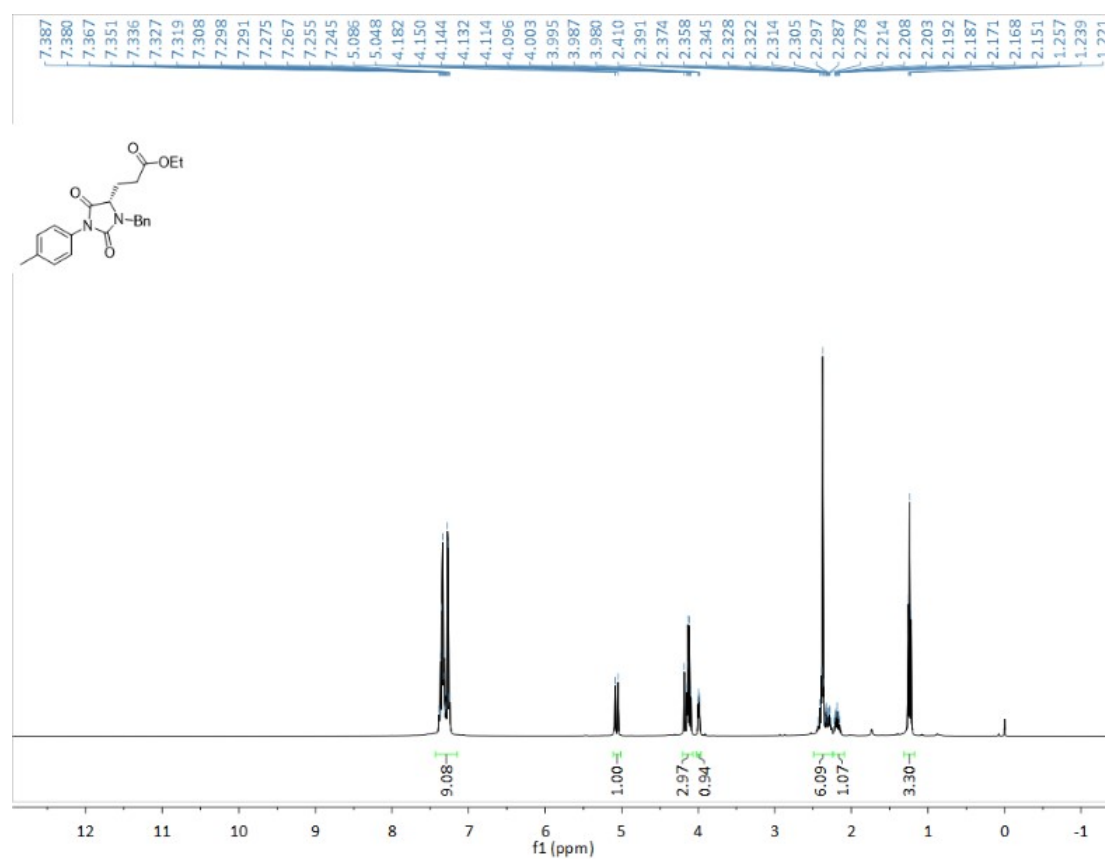



$^{13}\text{C}$  NMR (101 MHz,  $\text{CDCl}_3$ ) of compound **7s**

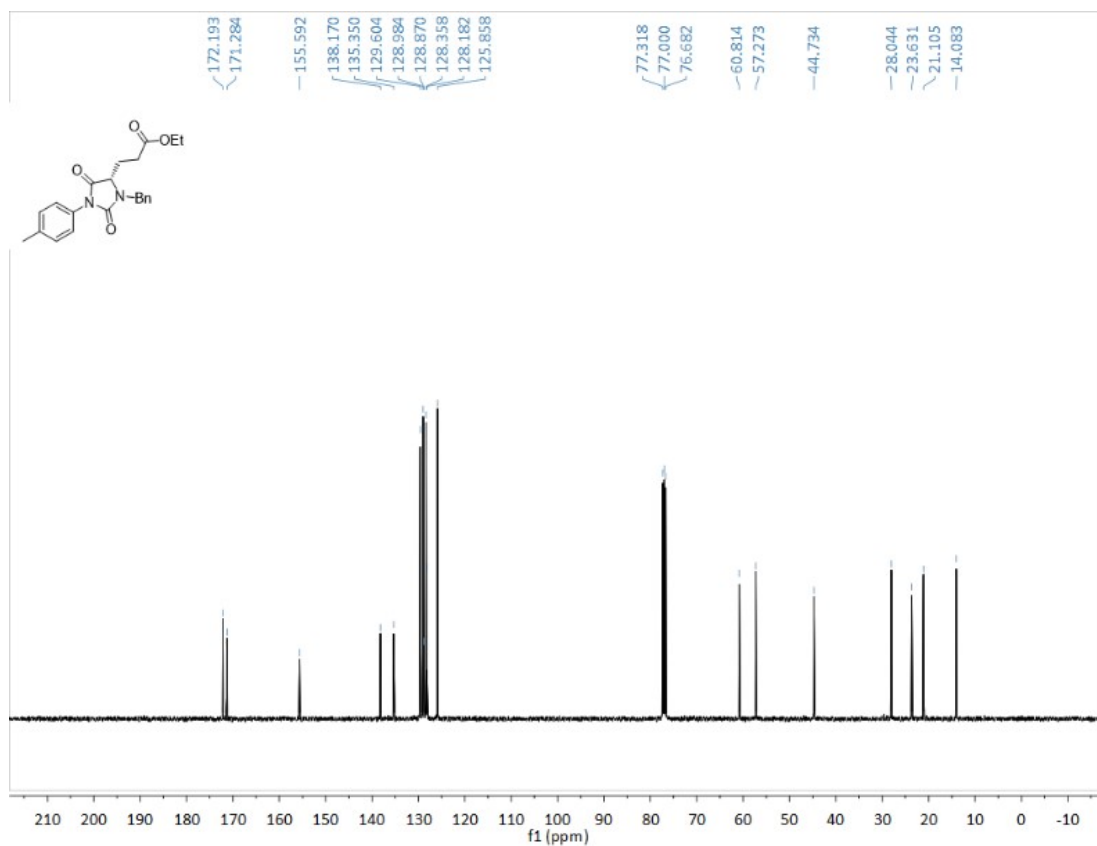

$^1\text{H}$  NMR (400 MHz,  $\text{CDCl}_3$ ) of compound **7t**

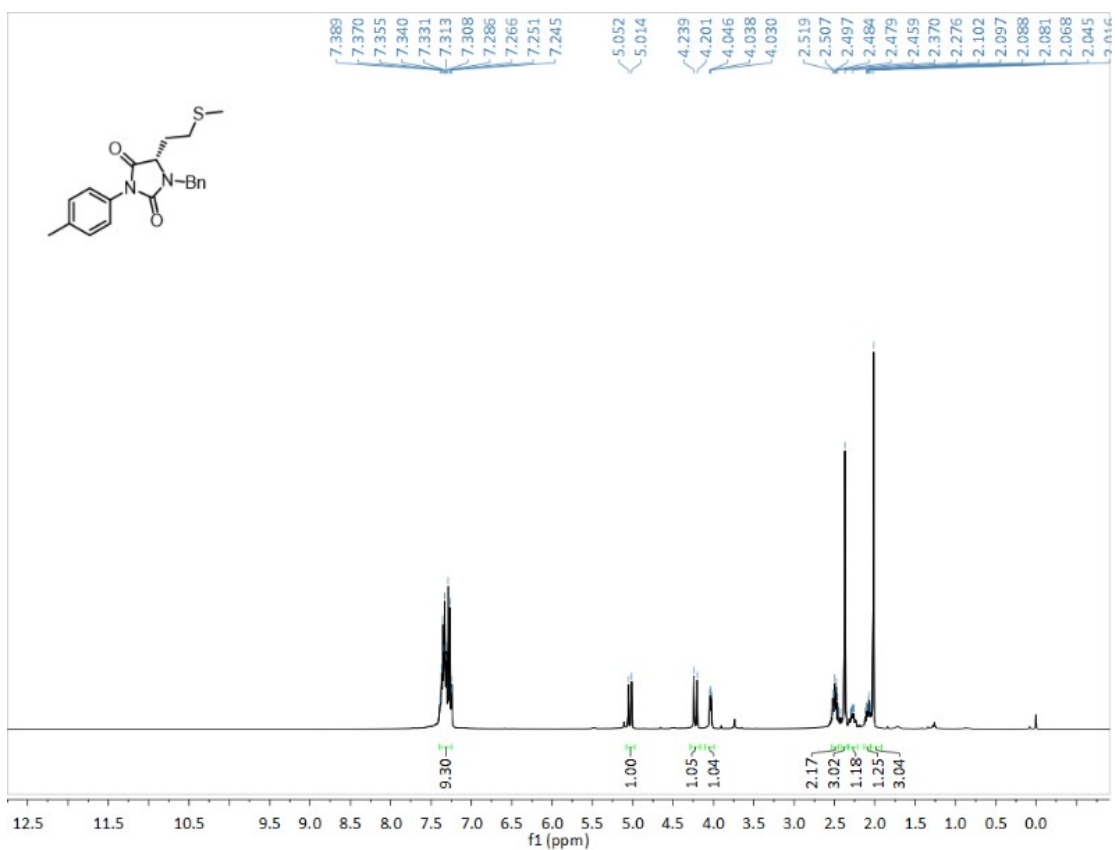

$^{13}\text{C}$  NMR (101 MHz,  $\text{CDCl}_3$ ) of compound **7t**

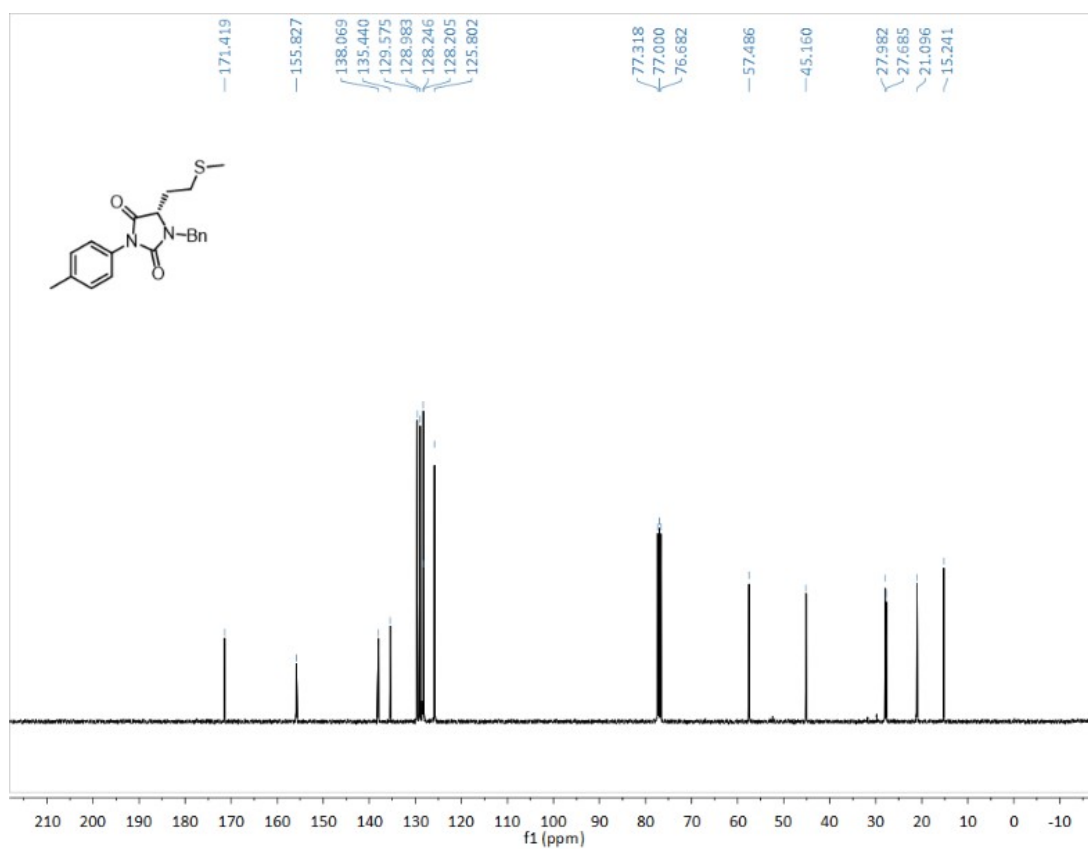

Supplement: d4qo02155j1.pdf [file d4qo02155j1.pdf]
